# Supplementary material for: Rational design of substituted maleimide dyes with tunable fluorescence and solvafluorochromism
Source: PubMed Central journal article supplement (PMC5885783; doi:10.1039/c8cc00772a), 2018-03-15
Supplement: CC-054-C8CC00772A-s001.pdf [file CC-054-C8CC00772A-s001.pdf]

# Electronic Supplementary Information

## For

# Rational Design of Substituted Maleimide Dyes with Tunable Fluorescence and Solvafluorochromism

*Yujie Xie,<sup>a</sup> Jon Husband,<sup>a</sup> Miquel Torrent-Sucarrat,<sup>b,c</sup> Huan Yang,<sup>d</sup>  
Weisheng Liu<sup>d</sup> and Rachel K. O'Reilly,<sup>a,e\*</sup>*

<sup>a</sup> Department of Chemistry, University of Warwick, Gibbet Hill Road, Coventry, CV4 7AL, UK.

<sup>b</sup> Department of Organic Chemistry I, Universidad del País Vasco (UPV/EHU), and Donostia International Physics Center (DIPC), Manuel Lardizabal Ibilbidea 3, 20018 Donostia, Spain.

<sup>c</sup> Ikerbasque, Basque Foundation for Science, María Díaz de Haro 3, 6º, 48013 Bilbao, Spain.

<sup>d</sup> Key Laboratory of Nonferrous Metals Chemistry and Resources Utilization of Gansu Province and State Key Laboratory of Applied Organic Chemistry, Lanzhou University, Lanzhou 730000, P. R. China

<sup>e</sup> School of Chemistry, University of Birmingham, Edgbaston, BT15 2TT, UK. E-mail: r.oreilly@bham.ac.uk

# Contents

|                                                                                        |     |
|----------------------------------------------------------------------------------------|-----|
| <b>1. Materials and apparatus</b> .....                                                | S3  |
| <b>2. Chemical structures of maleimides and synthetic protocols</b> .....              | S4  |
| <b>Chemical structures of maleimides</b> .....                                         | S4  |
| <b>Experimental procedure for di-halogen maleimides preparation</b> .                  | S5  |
| <b>General procedure of aminomaleimides synthesis</b> SError! Bookmark<br>not defined. |     |
| <b>General procedure for alkoxymaleimides synthesis</b> .....                          | S8  |
| <b>General procedure for thioaminomaleimide synthesis:</b> .....                       | S10 |
| <b>3. Fluorophore characterization</b> .....                                           | S15 |
| <b>4. UV-Vis Spectrum of maleimides</b> .....                                          | S17 |
| <b>5. Solvatochromic determination</b> .....                                           | S19 |
| <b>6. Photographs in different solvents under UV light</b> .....                       | S21 |
| <b>7. DSE effect of second thiol substituted amino maleimides</b> .....                | S22 |
| <b>8. NMR spectra of substituted maleimides</b> .....                                  | S23 |
| <b>9. Computational Details</b> .....                                                  | S44 |
| <b>10. References</b> .....                                                            | S67 |

## 1. MATERIALS AND APPARATUS

All chemicals and reagents were purchased from either: Sigma Aldrich, Fisher Chemicals, Acros Chemicals or Alfa Aesar and used as received. Dithiolmaleimides was synthesized according to a previous paper.<sup>1</sup> Solvents were purchased from Fisher Scientific and used as received. Dry solvents were used directly from a drying and degassing solvent tower delivery system.

NMR spectra were recorded on a Bruker Avance 300, a Bruker Avance III HD 400 or a Bruker Avance III HD 500 spectrometer at 298k and 300, 400 and 500 MHz, respectively. Shifts are quoted in  $\delta$  in parts per million and quoted relative to the internal standard trimethylsilane (TMS). High Resolution Mass Spectra (HR-MS) were conducted on a Bruker UHR-Q-ToF MaXis spectrometer with electrospray ionization. Infrared spectra were recorded (neat) on a PerkinElmer 100 FT-IR, UV-Vis spectroscopy was carried out on a Perkin Elmer Lambda 365 UV/vis spectrometer or an Agilent Cary 60 UV-Vis Spectrometer at room temperature. Fluorescence spectra were recorded using an Agilent Cary Eclipse Fluorescence spectrophotometer. Quartz cells with four polished sides (Starna) were used for fluorescence and UV-vis measurements. Fluorescence lifetime and absolute fluorescence quantum yield were performed on an Edinburgh Instruments FLS920 steady-state spectrometer fitted with an integrating sphere. Experiments were carried out in solution using 1 cm path length quartz cuvettes with four transparent polished faces.

## 2. CHEMICAL STRUCTURES OF MALEIMIDES AND SYNTHETIC PROTOCOLS

### Chemical structures of maleimides

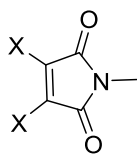

**1 (a-b)**

- a. X=Cl
- b. X=Br
- c. X=I

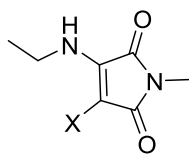

**2 (a-c)**

- a. X=Cl
- b. X=Br
- c. X=I

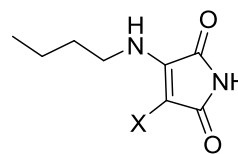

**2 (d-e)**

- d. X=Cl
- e. X=Br

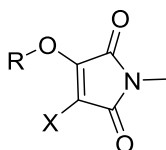

**3 (a-f)**

- a. X=Cl R=CH<sub>2</sub>CH<sub>3</sub>
- b. X=Br R=CH<sub>2</sub>CH<sub>3</sub>
- c. X=Cl R=CH<sub>2</sub>Ph
- d. X=Br R=CH<sub>2</sub>Ph
- e. X=Cl R=Ph
- f. X=Br R=Ph

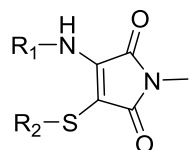

**4 (a-g)**

- a. R<sub>1</sub>=CH<sub>2</sub>CH<sub>3</sub> R<sub>2</sub>=(CH<sub>2</sub>)<sub>3</sub>CH<sub>3</sub>
- b. R<sub>1</sub>=CH<sub>2</sub>CH<sub>3</sub> R<sub>2</sub>=(CH<sub>2</sub>)<sub>17</sub>CH<sub>3</sub>
- c. R<sub>1</sub>=CH<sub>2</sub>CH<sub>3</sub> R<sub>2</sub>=Ph
- d. R<sub>1</sub>=CH<sub>2</sub>CH<sub>3</sub> R<sub>2</sub>=PhCH<sub>3</sub>
- e. R<sub>1</sub>=CH<sub>2</sub>CH<sub>3</sub> R<sub>2</sub>=CH<sub>2</sub>Ph
- f. R<sub>1</sub>=(CH<sub>2</sub>)<sub>3</sub>CH<sub>3</sub> R<sub>2</sub>=Ph
- g. R<sub>1</sub>=Ph R<sub>2</sub>=Ph

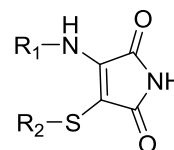

**4 (h-j)**

- h. R<sub>1</sub>=(CH<sub>2</sub>)<sub>3</sub>CH<sub>3</sub> R<sub>2</sub>=Ph
- i. R<sub>1</sub>=CH<sub>2</sub>CH<sub>3</sub> R<sub>2</sub>=(CH<sub>2</sub>)<sub>3</sub>CH<sub>3</sub>
- j. R<sub>1</sub>=(CH<sub>2</sub>)<sub>3</sub>CH<sub>3</sub> R<sub>2</sub>=CH<sub>2</sub>Ph

## Experimental procedure for di-halogen maleimides preparation

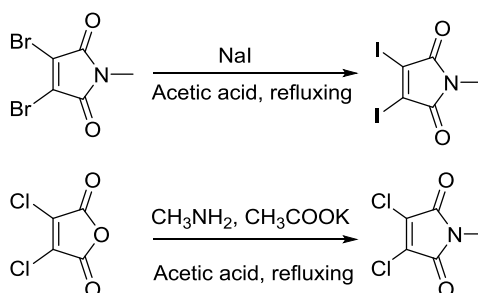

### 3,4-diiodo-1-methyl-1H-pyrrole-2,5-dione (1c):

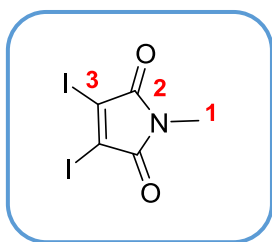

This compound was prepared by the method from the previous literature.<sup>2</sup> 3,4-dibromo-N-methylmaleimide (0.5 g, 1.859 mmol) and sodium iodide (1.115 g, 7.437 mmol) in acetic acid (20 ml) was heated at refluxing temperature for 2 h. Then the solution was added to water. The obtained yellow precipitate was filtered, washing with water and drying at 60 °C to obtain the 3,4-diiodo-1-methyl-1H-pyrrole-2,5-dione (0.527 g, 78.3%). Matches literature data.<sup>2</sup>

TLC conditions:  $R_f = 0.53$  (petroleum ether: ethyl acetate= 4:1), Yield =78.3%. <sup>1</sup>H NMR (400 MHz, CDCl<sub>3</sub>, ppm)  $\delta = 3.15$  (1H, s, H1). <sup>13</sup>C NMR (101 MHz, CDCl<sub>3</sub>, ppm)  $\delta = 166.2$  (C2), 117.1 (C3), 26.0 (C1). HR-MS (MaXis)  $m/z$  found 358.8141 (M+Na)<sup>+</sup>, calculated 385.8145; FTIR (neat)  $\nu_{\text{max}} / \text{cm}^{-1}$  1695 and 1560 (C=O of maleimide), 1426 and 1361 (C=C of maleimide).

### 3,4-dichloro-1-methyl-1H-pyrrole-2,5-dione (1a):

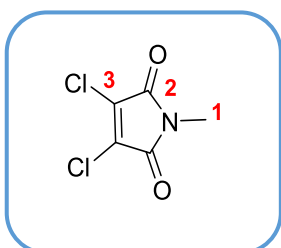

This compound was prepared by the method from the previous literature.<sup>3</sup> 3,4-dichloromaleic anhydride (1 g, 5.98 mmol), methylamine hydrochloride (0.605 g, 8.97 mmol), and potassium acetate (1.24 g, 8.97 mmol) were added to a solution of acetic acid (10 ml), and stirred for 4 hrs under reflux. The reaction become yellow, and was cooled to 25-30 °C, and poured slowly onto chilled sodium bicarbonate solution (1 M, 50 ml) until no effervesce was observed, followed by stirring for 1 hour. The solids were filtered, washed with *n*-hexane (2 x 30 ml) and dried under vacuum to obtain 3,4-dichloro-1-methyl-1H-pyrrole-2,5-dione (0.732 g, 68%). Matches literature data.<sup>3</sup>

TLC conditions:  $R_f = 0.61$  (petroleum ether: ethyl acetate= 4:1), Yield =68.0%.  $^1\text{H NMR}$  (400 MHz,  $\text{CDCl}_3$ )  $\delta = 3.12$  (1H, s, H1);  $^{13}\text{C NMR}$  (101 MHz,  $\text{CDCl}_3$ , ppm)  $\delta = 162.8$  (C2), 133.51 (C3), 25.1 (C1); FTIR (neat)  $\nu_{\text{max}} / \text{cm}^{-1}$  1708 and 1617 (C=O of maleimide), 1436 and 1381 (C=C of maleimide).

### General procedure of aminomaleimides synthesis

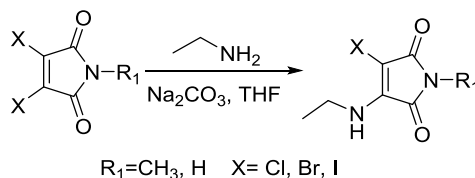

Reactions were performed according to the protocol established by a previous paper.<sup>4</sup> All reactions were performed in THF (20 mL) at room temperature with 2,3-dibromomaleimide/ 2,3-dibromomethylmaleimide (1 eq.), sodium carbonate (2.5 eq.) and a small excess of amine (1.05-1.1 eq.). Consumption of 2,3-dibromomaleimide was monitored by TLC, and was complete within 30 min to 2 h. The solvent was then evaporated under reduced pressure and the residue was taken up with 150 mL of  $\text{CH}_2\text{Cl}_2$ . The resultant mixture was washed with water ( $2 \times 150$  mL), dried with sodium sulfate and purified *via* column chromatography on silica gel with petroleum ether/ethyl acetate.

### 3-chloro-4-(ethylamino)-1-methyl-1H-pyrrole-2,5-dione (2a):

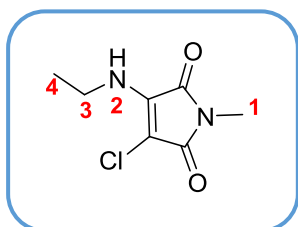

TLC conditions:  $R_f = 0.60$  (petroleum ether: ethyl acetate= 2:1), Yield =60.5%.  $^1\text{H NMR}$  (400 MHz,  $\text{CDCl}_3$ , ppm)  $\delta = 5.30$  (1H, s, H2), 3.76 – 3.58 (2H, m, H3), 3.00 (3H, s, H1), 1.30 (3H, t,  $^3J_{\text{H-H}} = 7.2$  Hz, H4);  $^{13}\text{C NMR}$  (101 MHz,  $\text{CDCl}_3$ , ppm)  $\delta = 38.1$  (C3), 24.2 (C1), 16.1 (C4); HR-MS (MaXis)  $m/z$  found 211.0247 ( $\text{M}+\text{Na}$ )<sup>+</sup>, calculated 211.0245; FTIR (neat)  $\nu_{\text{max}} / \text{cm}^{-1}$  3344 (H-N of amine), 1694 and 1629 (C=O of maleimide), 1436 and 1372 (C=C of maleimide).

### 3-bromo-4-(ethylamino)-1-methyl-1H-pyrrole-2,5-dione (2b):

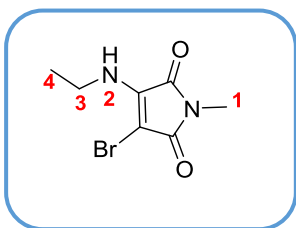

TLC conditions:  $R_f = 0.60$  (petroleum ether: ethyl acetate= 2:1) Yield =54.3%.  $^1\text{H NMR}$  (400 MHz,  $\text{CDCl}_3$ , ppm)  $\delta = 5.35$  (1H, s, H2), 3.78 – 3.63 (2H, m, H3), 3.02 (3H, s, H1), 1.29 (3H, t,  $^3J_{\text{H-H}} = 7.2$  Hz, H4);  $^{13}\text{C NMR}$  (101 MHz,  $\text{CDCl}_3$ , ppm)  $\delta = 38.0$  (C3), 24.4 (C1), 15.8 (C4); HR-MS (MaXis)  $m/z$  found 256.9720

(M+Na)<sup>+</sup>, calculated 256.9719; FTIR (neat)  $\nu_{\max}$  / cm<sup>-1</sup> 3332 (H-N of amine), 1707 and 1655 (C=O of maleimide), 1449 and 1372 (C=C of maleimide).

### 3-iodo-4-(ethylamino)-1-methyl-1H-pyrrole-2,5-dione (2c):

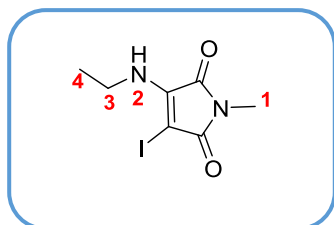

TLC conditions:  $R_f$  = 0.60 (petroleum ether: ethyl acetate= 2:1); Yield = 32.1%; <sup>1</sup>H NMR (400 MHz, CDCl<sub>3</sub>, ppm)  $\delta$ =5.35 (1H, s, H2), 3.78 – 3.63 (2H, m, H3), 3.02 (3H, s, H1), 1.29 (3H, t, <sup>3</sup>J<sub>H-H</sub> 7 Hz, H4). <sup>13</sup>C NMR (101 MHz, CDCl<sub>3</sub>, ppm)  $\delta$ =38.0 (C3), 24.4 (C1), 15.8 (C4); HR-MS (MaXis)

m/z found 302.9604 (M+Na)<sup>+</sup>, calculated 302.9601. FTIR (neat)  $\nu_{\max}$  / cm<sup>-1</sup> 3332 (H-N of amine), 1604 (C=O of maleimide), 1449 (C=C of maleimide).

### 3-(butylamino)-4-chloro-1-methyl-1H-pyrrole-2,5-dione (2d):

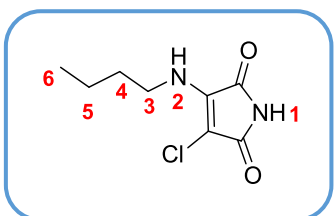

TLC conditions:  $R_f$  = 0.50 (petroleum ether: ethyl acetate= 2:1), Yield = 58.7%. <sup>1</sup>H NMR (400 MHz, CDCl<sub>3</sub>, ppm)  $\delta$ =7.08 (1H, s, H1), 5.31 (1H, s, H2), 3.62 (2H, td, <sup>3</sup>J<sub>H-H</sub> = 14, 7 Hz, H3), 1.74 – 1.53 (2H, m, <sup>3</sup>J<sub>H-H</sub> = 7 Hz, H4), 1.48 – 1.34 (2H, sex, <sup>3</sup>J<sub>H-H</sub> = 7 Hz, H5), 0.97 (3H, t, <sup>3</sup>J<sub>H-H</sub> = 7 Hz, H6). <sup>13</sup>C

NMR (101 MHz, CDCl<sub>3</sub>, ppm)  $\delta$ =42.8 (C3), 32.8 (C4), 19.6 (C5), 13.6 (C6); HR-MS (MaXis) m/z found 225.0404 (M+Na)<sup>+</sup>, calculated 225.0401; FTIR (neat)  $\nu_{\max}$  / cm<sup>-1</sup> 3319 (H-N of amine), 3138 (H-N of maleimide) 1772 and 1707 (C=O of maleimide), 1404 and 1359 (C=C of maleimide).

### 3-bromo-4-(butylamino)-1H-pyrrole-2,5-dione (2e):

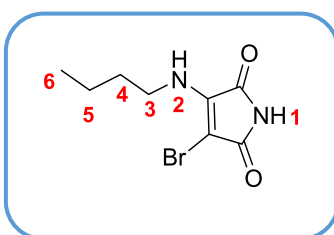

TLC conditions:  $R_f$  = 0.50 (petroleum ether: ethyl acetate= 2:1), Yield = 69.2%; <sup>1</sup>H NMR (400 MHz, CDCl<sub>3</sub>, ppm)  $\delta$ =7.17 (1H, s, H1), 5.41 (1H, s, H2), 3.65 (2H, dd, J = 7 Hz, H3), 1.70 – 1.58 (2H, quin, <sup>3</sup>J<sub>H-H</sub> = 7 Hz, H4), 1.42 (2H, sex, <sup>3</sup>J<sub>H-H</sub> = 7 Hz, H5), 0.97 (3H, t, <sup>3</sup>J<sub>H-H</sub> = 7 Hz, H6). <sup>13</sup>C NMR

(101 MHz, CDCl<sub>3</sub>)  $\delta$ =42.9 (C3), 32.7 (C4), 19.5 (C5), 13.7 (C6); HR-MS (MaXis) m/z found 268.9898 (M+Na)<sup>+</sup>, calculated 268.9896. FTIR (neat)  $\nu_{\max}$  / cm<sup>-1</sup> 3344 (H-N of amine), 3138 (H-N of maleimide) 1617 and 1707 (C=O of maleimide), 1462 and 1333 (C=C of maleimide);

## General procedure for alkoxy maleimides synthesis

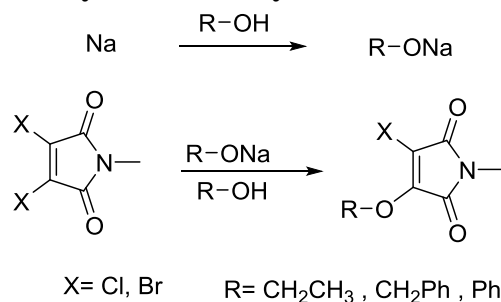

Reactions were performed according to the protocol established by a previous paper.<sup>5</sup> Sodium alkoxide solution was freshly prepared by the addition of sodium (2 mmol, 1 equiv) to the desired alcohol. This solution was then added dropwise to a cooled solution of the maleimide (2 mmol, 1 equiv) in the same alcohol (10 mL). This was kept at 0 °C in an ice bath. Consumption of 2, 3-dibromo/chloro maleimide was monitored by TLC, and was complete within 30 min to 1 h. Then the reaction mixture was concentrated *in vacuo* and separated between ethyl acetate and aqueous ammonium chloride solution. The aqueous layer was washed with ethyl acetate (50 mL×3), then the combined organic extracts washed with water (50 mL×3), brine, and dried with Na<sub>2</sub>SO<sub>4</sub>. Concentration *in vacuo*, followed by purification *via* column chromatography on silica gel with petroleum ether/ethyl acetate, afforded the products.

### 3-chloro-4-ethoxy-1-methyl-1H-pyrrole-2,5-dione (3a):

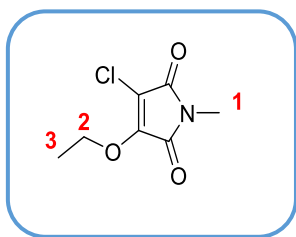

TLC conditions: R<sub>f</sub> = 0.38 (petroleum ether: ethyl acetate = 4:1). Yield = 55.1%. <sup>1</sup>H NMR (400 MHz, CDCl<sub>3</sub>, ppm) δ = 4.72 (2H, q, <sup>3</sup>J<sub>H-H</sub> = 7 Hz, H<sub>2</sub>), 3.05 (3H, s, H<sub>1</sub>), 1.49 (3H, t, <sup>3</sup>J<sub>H-H</sub> = 7 Hz, H<sub>3</sub>). <sup>13</sup>C NMR (101 MHz, CDCl<sub>3</sub>, ppm) δ = 68.8 (C<sub>2</sub>), 23.9 (C<sub>1</sub>), 15.1 (C<sub>3</sub>). HR-MS (MaXis) m/z found 212.0084 (M+Na)<sup>+</sup>, calculated 212.0085; FTIR (neat) ν<sub>max</sub> / cm<sup>-1</sup> 1707 and 1655 (C=O of maleimide), 1436 and 1384 (C=C of maleimide), 1255 (C-O of alcohol).

### 3-bromo-4-ethoxy-1-methyl-1H-pyrrole-2,5-dione (3b):

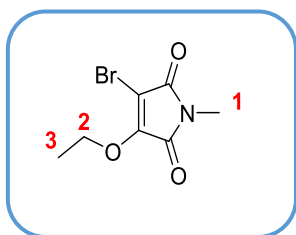

TLC conditions: R<sub>f</sub> = 0.38 (petroleum ether: ethyl acetate = 4:1). Yield = 42.5%. <sup>1</sup>H NMR (400 MHz, CDCl<sub>3</sub>, ppm) δ = 4.70 (2H, q, <sup>3</sup>J<sub>H-H</sub> = 7 Hz, H<sub>2</sub>), 3.03 (3H, s, H<sub>1</sub>), 1.47 (3H, t, <sup>3</sup>J<sub>H-H</sub> = 7 Hz, H<sub>3</sub>); <sup>13</sup>C NMR (101 MHz, CDCl<sub>3</sub>) δ 68.7 (C<sub>2</sub>), 24.1 (C<sub>1</sub>), 15.4



(C3); FTIR (neat)  $\nu_{\max} / \text{cm}^{-1}$  1720 and 1640 (C=O of maleimide), 1436 and 1382 (C=C of maleimide), 1268 (C-O of alcohol).

### 3-(benzyloxy)-4-chloro-1-methyl-1H-pyrrole-2,5-dione (3c):

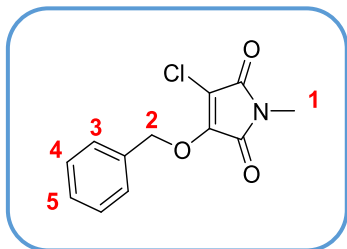

TLC conditions:  $R_f = 0.41$  (petroleum ether: ethyl acetate= 4:1). Yield = 43.7%;  $^1\text{H NMR}$  (400 MHz, DMSO, ppm)  $\delta=7.60 - 7.39$  (5H, m, H3), 5.71 (2H, s, H2), 2.94 (3H, s, H3);  $^{13}\text{C NMR}$  (101 MHz, DMSO, ppm)  $\delta=131.24 - 125.94$  (m, C3), 73.83 (C2), 24.42 (C1); HR-MS (MaXis)  $m/z$  found 274.0243, calc. 274.0241 ( $[\text{M}+\text{Na}]^+100\%$ ); FTIR (neat)

$\nu_{\max} / \text{cm}^{-1}$  1720 and 1642 (C=O of maleimide), 1449 and 1397 (C=C of maleimide), 1255 (C-O of alcohol), 752 and 701 (C-H of aromatic).

### 3-(benzyloxy)-4-bromo-1-methyl-1H-pyrrole-2,5-dione (3d):

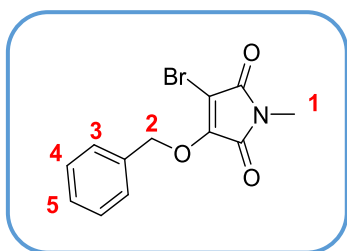

TLC conditions:  $R_f = 0.41$  (petroleum ether: ethyl acetate= 4:1). Yield = 32.1%;  $^1\text{H NMR}$  (400 MHz, DMSO, ppm)  $\delta=7.55 - 7.35$  (5H, m, H3), 5.69 (2H, s, H2), 2.90 (3H, s, H3);  $^{13}\text{C NMR}$  (101 MHz, DMSO, ppm)  $\delta=130.4 - 126.2$  (m, C3), 73.8 (C2), 24.5 (C1); HR-MS (MaXis)  $m/z$  found 317.9731, calc. 317.9736 ( $[\text{M}+\text{Na}]^+100\%$ ); FTIR (neat)  $\nu_{\max} / \text{cm}^{-1}$  1707 and 1642 (C=O of maleimide), 1423 and 1382 (C=C of maleimide), 1255 (C-O of alcohol), 740 and 688 (C-H of aromatic);

### 3-chloro-1-methyl-4-phenoxy-1H-pyrrole-2,5-dione (3e):

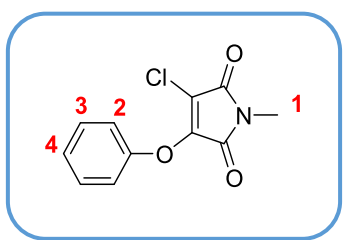

TLC conditions:  $R_f = 0.41$  (petroleum ether: ethyl acetate= 4:1); Yield = 55.1%;  $^1\text{H NMR}$  (400 MHz, MeOD, ppm)  $\delta=7.43$  (2H, t,  $J = 8$  Hz, H2), 7.28 (2H, t,  $J = 7$  Hz, H3), 7.23 (1H, d,  $J = 8$  Hz.), 3.03 (3H, s, H1).  $^{13}\text{C NMR}$  (101 MHz, MeOD, ppm)  $\delta=129.43$  (C2), 125.47 (C3), 118.70 (C4),

22.87 (C1); HR-MS (MaXis)  $m/z$  found 260.0085 ( $[\text{M}+\text{Na}]^+$ ), calculated 260.0085; FTIR (neat)  $\nu_{\max} / \text{cm}^{-1}$  1720 (C=O of maleimide), 1433 and 1392 (C=C of maleimide), 1270 (C-O of alcohol), 774 and 695 (C-H of aromatic).

### 3-bromo-1-methyl-4-phenoxy-1H-pyrrole-2,5-dione (3f):

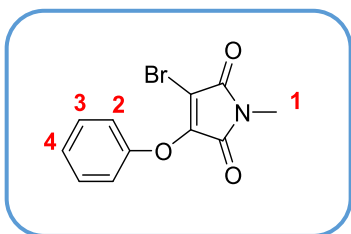

TLC conditions:  $R_f = 0.41$  (petroleum ether: ethyl acetate= 4:1); Yield =51.0%.  $^1\text{H NMR}$  (400 MHz, DMSO, ppm)  $\delta=7.43$  (2H, t,  $J = 7.5$  Hz, H2), 7.28 (3H, dd,  $J = 14, 7$  Hz, H2,3), 2.93 (3H, s, H1);  $^{13}\text{C NMR}$  (101 MHz, DMSO, ppm)  $\delta=130.2$  (C2), 125.9 (C3), 119.1 (C4), 24.7 (C1). HR-MS (MaXis)  $m/z$  found 303.9586 ( $\text{M}+\text{Na}$ ) $^+$ , calculated 303.9580; FTIR (neat)  $\nu_{\text{max}} / \text{cm}^{-1}$  1720 (C=O of maleimide), 1436 and 1359 (C=C of maleimide), 1165 (C-O of alcohol), 830 and 714 (C-H of aromatic).

### General procedure for thioaminomaleimide synthesis:

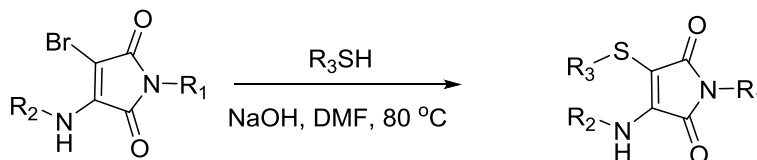

Aminobromomaleimide (2 mmol, 1 equiv.) was dissolved in DMF (30 mL) followed by addition of NaOH (3 mmol, 1.5 equiv). The mixture was stirred for 5 minutes and then thiol (2 mmol, 1 equiv.) was added dropwise. Upon complete addition, the solution was allowed to warm to 80 °C and left to stir for 20 hours. Then the reaction mixture was concentrated *in vacuo* and dissolved in ethyl acetate. The organic solution washed with water, brine and dried over anhydrous  $\text{Na}_2\text{SO}_4$ . The solution was filtered and concentrated *in vacuo*, and the crude product was purified by column chromatography (petroleum ether: ethyl acetate = 10:1-3:1) to yield the yellow product.

### 3-(butylthio)-4-(ethylamino)-1-methyl-1H-pyrrole-2,5-dione (4a):

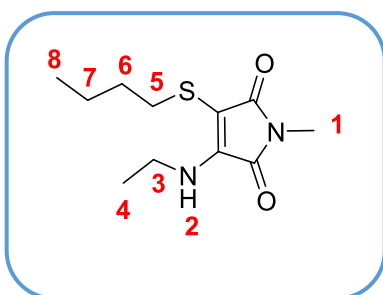

TLC conditions:  $R_f = 0.63$  (petroleum ether: ethyl acetate= 2:1); Yield =36.8%;  $^1\text{H NMR}$  (400 MHz,  $\text{CDCl}_3$ , ppm)  $\delta=5.54$  (1H, s, H2), 3.88 – 3.79 (2H, m, H3), 3.01 (3H, s, H1), 2.71 – 2.65 (2H, t,  $^3J_{\text{H-H}} = 7$  Hz, H5), 1.61 – 1.51 (2H, quin,  $^3J_{\text{H-H}} = 7$  Hz, H6), 1.41 (2H, sex,  $^3J_{\text{H-H}} = 7$  Hz, H7), 1.30 (3H, t,  $^3J_{\text{H-H}} = 7$  Hz, H4), 0.91 (3H, t,  $^3J_{\text{H-H}} = 7$  Hz, H8);  $^{13}\text{C NMR}$  (101 MHz,  $\text{CDCl}_3$ , ppm)  $\delta=38.4$  (C3), 35.7 (C5), 31.9 (C6), 24.1 (C1), 21.8 (C7), 15.4 (C4), 13.6 (C8); HR-MS (MaXis)  $m/z$  found 265.0983, calc. 265.0981 ( $[\text{M}+\text{Na}]^+$ , 100%); FTIR (neat)  $\nu_{\text{max}} / \text{cm}^{-1}$  3307 (H-N of amine), 1708 and 1617 (C=O of maleimide), 1436 and 1371 (C=C of maleimide).

### 3-(ethylamino)-1-methyl-4-(octadecanethio)-1H-pyrrole-2,5-dione (4b):

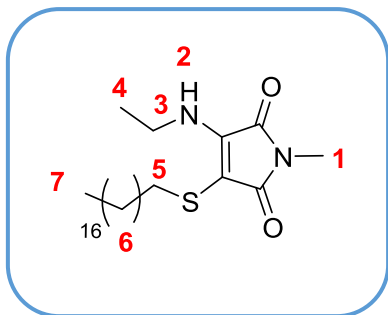

TLC conditions:  $R_f = 0.39$  (petroleum ether: ethyl acetate= 2:1); Yield =18.2 %;  $^1\text{H}$  NMR (400 MHz,  $\text{CDCl}_3$ , ppm)  $\delta=5.53$  (1H, s, H2), 3.82 (2H, p,  $^3J_{\text{H-H}} = 7$  Hz, H3), 3.00 (3H, s, H1), 2.69 – 2.64 (2H, m, H5), 1.32 – 1.19 (34H, m, H6+H4), 0.88 (3H, t,  $J = 7$  Hz, H7);  $^{13}\text{C}$  NMR (1 MHz,  $\text{CDCl}_3$ , ppm)  $\delta=38.5$  (C3), 36.2 (C5), 31.9- 29.8 (C6), 24.2 (C4), 22.9 (C6), 15.3 (C7), 14.0 (C1); HR-MS (MaXis)  $m/z$  found 461.3171, calc. 461.3172 ( $[\text{M}+\text{Na}]^+$  100%); FTIR (neat)  $\nu_{\text{max}} / \text{cm}^{-1}$  3320 (H-N of amine), 1700 and 1621 (C=O of maleimide), 1463 and 1391 (C=C of maleimide).

### 3-(ethylamino)-1-methyl-4-(phenylthio)-1H-pyrrole-2,5-dione (4c):

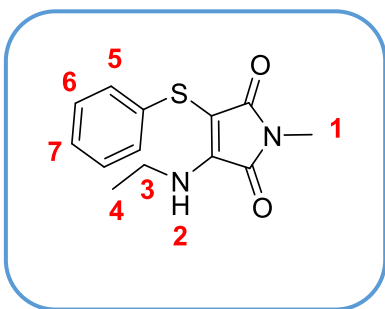

TLC conditions:  $R_f = 0.42$  (petroleum ether: ethyl acetate= 2:1); Yield =50.9%;  $^1\text{H}$  NMR (400 MHz,  $\text{CD}_3\text{CN}$ , ppm)  $\delta= 7.30$  (2H, dd,  $^3J_{\text{H-H}} = 10, 4$  Hz, H5), 7.23 (2H, dd,  $^3J_{\text{H-H}} = 5, 3$  Hz, H6), 7.19 – 7.14 (1H, m, H7), 3.70 (2H, p,  $^3J_{\text{H-H}} = 7$  Hz, H3), 2.96 (3H, s, H1), 1.16 (t,  $^3J_{\text{H-H}} = 3\text{H}, 7$  Hz, H4).  $^{13}\text{C}$  NMR (101 MHz,  $\text{CD}_3\text{CN}$ , ppm)  $\delta=129.6$  (C5), 126.0 (C6), 125.8 (C7), 38.3 (C3), 24.1 (C1), 15.4 (C4). HR-MS (MaXis)  $m/z$  found 285.0667, calc. 285.0668 ( $[\text{M}+\text{Na}]^+$  100%); FTIR (neat)  $\nu_{\text{max}} / \text{cm}^{-1}$  3313 (H-N of amine), 1696 and 1614 (C=O of maleimide), 1437 and 1390 (C=C of maleimide), 792 and 683 (C-H of aromatic).

### 3-(ethylamino)-1-methyl-4-(o-tolylthio)-1H-pyrrole-2,5-dione (4d):

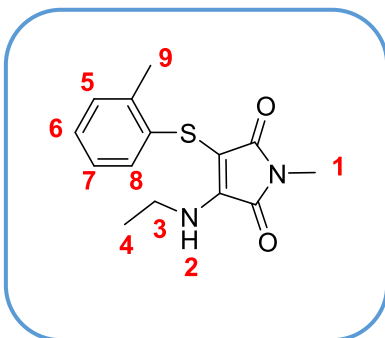

TLC conditions:  $R_f = 0.47$  (petroleum ether: ethyl acetate= 2:1); Yield =55.6%;  $^1\text{H}$  NMR (400 MHz,  $\text{CD}_3\text{CN}$ , ppm)  $\delta=7.17$  (1H, t,  $^3J_{\text{H-H}} = 8$  Hz, H5), 7.12 (1H, d,  $^3J_{\text{H-H}} = 7.5$  Hz, H6), 7.06 (2H, t,  $^3J_{\text{H-H}} = 6$  Hz, H7, H8), 3.65 (2H, p,  $^3J_{\text{H-H}} = 7$  Hz, H3), 2.97 (3H, s, H1), 2.38 (3H, s, H9), 1.13 (1H, t,  $^3J_{\text{H-H}} = 7$  Hz, H4);  $^{13}\text{C}$  NMR (101 MHz,  $\text{CD}_3\text{CN}$ , ppm)  $\delta =130.6$  (C5), 127.1 (C7), 125.4 (C6), 125.2 (C8), 38.3 (C3), 24.1 (C1), 19.3 (C9), 15.4 (C4); HR-MS (MaXis)  $m/z$  found 299.0827, calc. 299.0825 ( $[\text{M}+\text{Na}]^+$  100%); FTIR (neat)  $\nu_{\text{max}} / \text{cm}^{-1}$  3327 (H-N of amine),

1703 and 1602 (C=O of maleimide), 1436 and 1383 (C=C of maleimide), 797 and 744 (C-H of aromatic).

### 3-(benzylthio)-4-(ethylamino)-1-methyl-1H-pyrrole-2,5-dione (4e):

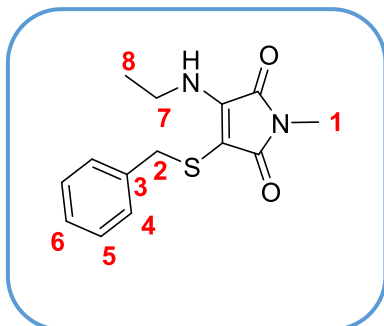

TLC conditions:  $R_f = 0.39$  (petroleum ether: ethyl acetate= 2:1); Yield =11.9%;  $^1\text{H}$  NMR (400 MHz, DMSO)  $\delta$  7.23 (5H, ddd,  $J = 26, 16, 7$  Hz, H 4-6), 3.78 (2H, s, H3), 3.27 (2H, dd,  $J = 13, 6$  Hz, H7), 2.88 (3H, s, H1), 0.90 (3H, t,  $J = 7$  Hz, H8);  $^{13}\text{C}$  NMR (101 MHz, DMSO, ppm)  $\delta$  129.2 (C4), 128.7, 127.3 (C5, C6), 37.8 (C7), 24.1 (C1), 15.0 (C8); HR-MS (MaXis)  $m/z$  found 299.0825, calc. 299.0825 ( $[\text{M}+\text{Na}]^+$ , 100%); FTIR (neat)  $\nu_{\text{max}} / \text{cm}^{-1}$  3306 (H-N of amine), 1707 and 1604 (C=O of maleimide), 1345 (C=C of maleimide, 757 and 641 (C-H of aromatic).

### 3-(butylamino)-1-methyl-4-(phenylthio)-1H-pyrrole-2,5-dione (4f):

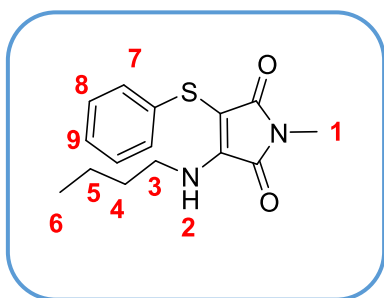

TLC conditions:  $R_f = 0.23$  (petroleum ether: ethyl acetate= 2:1). Yield =42.3%.  $^1\text{H}$  NMR (400 MHz, DMSO, ppm)  $\delta$ =7.28 (2H, t,  $J = 7$  Hz, H7), 7.13 (3H, dd,  $J = 14, 7$  Hz, H8-9), 3.52 (2H, d,  $J = 6$  Hz, H3), 2.91 (3H, s, H1), 1.52 – 1.33 (2H, m, H4), 1.17 (2H, dd,  $J = 14, 7$  Hz, H5), 0.71 (3H, t,  $J = 7$  Hz, H6);  $^{13}\text{C}$  NMR (101 MHz, DMSO)  $\delta$  129.5 (C7), 125.4 (C8), 125.3 (C9), 42.6 (C3), 32.2 (C4), 24.5 (C1), 19.6 (C5), 13.9 (C6); HR-MS (MaXis)  $m/z$  found 289.1015, calc. 289.1016 ( $[\text{M}+\text{Na}]^+$ , 100%); FTIR (neat)  $\nu_{\text{max}} / \text{cm}^{-1}$  3332 (H-N of amine), 1681 and 1604 (C=O of maleimide), 1436 and 1384 (C=C of maleimide), 740 and 688 (C-H of aromatic).

### 1-methyl-3-(phenylamino)-4-(phenylthio)-1H-pyrrole-2,5-dione (4g):

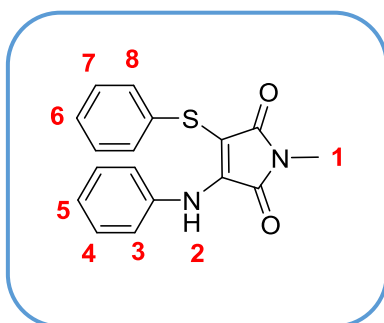

TLC conditions:  $R_f = 0.44$  (petroleum ether: ethyl acetate= 2:1); Yield =44.2%;  $^1\text{H}$  NMR (400 MHz, DMSO, ppm)  $\delta$ = 10.10 (1H, s, H2), 7.18 – 6.99 (8H, m, H4-8), 6.91 (H2, d,  $J = 7$  Hz, H3), 2.97 (3H, s, H1);  $^{13}\text{C}$  NMR (101 MHz, DMSO, ppm)  $\delta$  129.1 (C5), 128.0 (C8), 126.3 (C4), 125.8 (C7), 125.5 (C5), 124.8 (C6), 24.6

(C1); HR-MS (MaXis)  $m/z$  found 333.0678, calc. 333.0668 ( $[M+Na]^+$  100%); FTIR (neat)  $\nu_{\max} / \text{cm}^{-1}$  3281 (H-N of amine), 1694 and 1604 (C=O of maleimide), 1449 (C=C of maleimide), 740 and 688 (C-H of aromatic).

### 3-(butylamino)-4-(phenylthio)-1H-pyrrole-2,5-dione (4h):

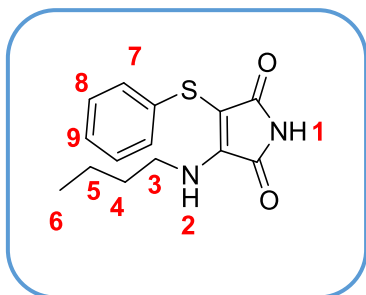

TLC conditions:  $R_f = 0.23$  (petroleum ether: ethyl acetate= 2:1); Yield = 50.1%;  $^1\text{H}$  NMR (400 MHz, DMSO, ppm)  $\delta=10.75$  (1H, s, H1), 8.32 (1H, s, H2), 7.29 (2H, t,  $^3J_{\text{H-H}} = 7$  Hz, H7), 7.18 – 7.06 (3H, m, H8, H9), 3.51 (2H, d,  $^3J_{\text{H-H}} = 7$  Hz, H3), 1.49 – 1.33 (2H, m, H4), 1.22 – 1.08 (2H, m, H5), 0.72 (3H, t,  $^3J_{\text{H-H}} = 7$  Hz, H6);  $^{13}\text{C}$  NMR (101 MHz, DMSO, ppm)  $\delta$  129.5 (C7), 125.3 (C8, C9), 42.4 (C3), 32.2 (C4), 19.6 (C5), 13.9 (C6); HR-MS (MaXis)  $m/z$  found 299.0872, calc. 299.0825 ( $[M+Na]^+$  100%); FTIR (neat)  $\nu_{\max} / \text{cm}^{-1}$  3216 (H-N of amine), 1720 and 1617 (C=O of maleimide), 1345 (C=C of maleimide), 740 and 688 (C-H of aromatic).

### 3-(butylthio)-4-(ethylamino)-1H-pyrrole-2,5-dione (4i):

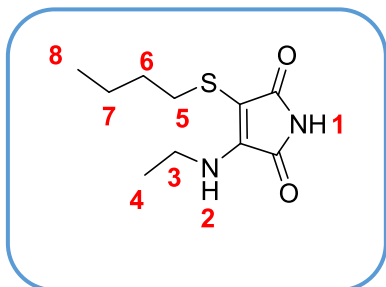

TLC conditions:  $R_f = 0.39$  (petroleum ether: ethyl acetate= 2:1); Yield = 18.9%;  $^1\text{H}$  NMR (400 MHz,  $\text{CDCl}_3$ , ppm)  $\delta=7.2$  (1H, s, H1), 5.5 (1H, s, H2), 3.8 (2H, p,  $^3J_{\text{H-H}} = 7$  Hz, H3), 2.7 – 2.5 (2H, m, H5), 1.6 – 1.5 (2H, m, H6), 1.4 – 1.3 (2H, m, H7), 1.2 (3H,  $^3J_{\text{H-H}} = 7$  Hz, H4), 0.8 (3H,  $^3J_{\text{H-H}} = 7$  Hz, H8).  $^{13}\text{C}$  NMR (101 MHz,  $\text{CDCl}_3$ , ppm)  $\delta$  171.1, 166.3 (C=O), 38.4 (C3), 35.6 (C5), 31.9 (C6), 21.9 (C7), 15.4 (C4), 13.6 (C8); HR-MS (MaXis)  $m/z$  found 229.1007, calc. 229.1005 ( $[M+H]^+$  100%) FTIR (neat)  $\nu_{\max} / \text{cm}^{-1}$  3319 (H-N of amine), 3164 (H-N of maleimide), 1707 and 1617 (C=O of maleimide), 1359 (C=C of maleimide).

**3-(benzylamino)-4-(butylthio)-1H-pyrrole-2,5-dione (4j):**

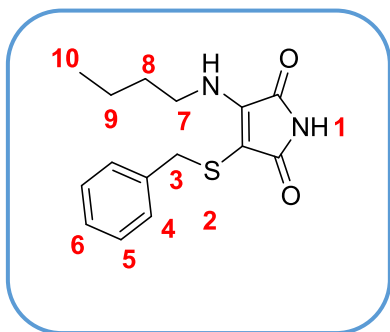

TLC conditions:  $R_f = 0.42$  (petroleum ether: ethyl acetate= 2:1). Yield =26.4%.  $^1\text{H}$  NMR (400 MHz, MeOD, ppm)  $\delta=7.23$  (5H, ddd,  $^3J_{\text{H-H}} = 25, 16, 7$ ; H 4, 5, 6), 3.8 (2H, s, H3), 3.25 (2H, t,  $^3J_{\text{H-H}} = 7$  Hz, H7), 1.49 – 1.19 (4H, m, H8, 9), 0.9 (3H, t,  $^3J_{\text{H-H}} = 7$  Hz, H10);  $^{13}\text{C}$  NMR (101 MHz, MeOD, ppm)  $\delta$  128. 7, 127.8, 126.7 (C6, 5, 4), 42.0 (C7), 39.3 (C8), 31.2 (C9), 19.4 (C10);

HR-MS (MaXis)  $m/z$  found 313.0981, calc. 313.0981 ( $[\text{M}+\text{Na}]^+$  100%); FTIR (neat)  $\nu_{\text{max}}$  /  $\text{cm}^{-1}$  3315 (H-N of amine), 1711 and 1620 (C=O of maleimide), 1359 (C=C of maleimide), 765 and 705 (C-H of aromatic).

### 3. FLUOROPHORE CHARACTERIZATION

Table S1 Structures of substituted maleimides and associated fluorescence properties

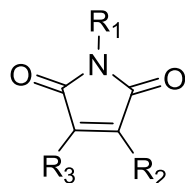

| Sample | R <sub>1</sub>  | R <sub>2</sub>                                    | R <sub>3</sub> | Solvent       | Φ <sub>f</sub> <sup>a</sup><br>% | ε <sub>max</sub><br>M <sup>-1</sup> cm <sup>-1</sup> | λ <sup>b</sup> <sub>abs</sub><br>nm | λ <sup>b</sup> <sub>ex</sub><br>nm | λ <sup>b</sup> <sub>em</sub><br>nm | Δλ <sup>c</sup><br>nm |
|--------|-----------------|---------------------------------------------------|----------------|---------------|----------------------------------|------------------------------------------------------|-------------------------------------|------------------------------------|------------------------------------|-----------------------|
| 2a     | CH <sub>3</sub> | NHCH <sub>2</sub> CH <sub>3</sub>                 | Cl             | Diethyl Ether | 37                               | 3669                                                 | 239, 369                            | 365                                | 475                                | 236,106               |
|        |                 |                                                   |                | Cyclohexane   | 56                               | 3198                                                 | 238, 365                            | 364                                | 482                                | 244,117               |
|        |                 |                                                   |                | Methanol      | 1                                | 3355                                                 | 239, 379                            | 380                                | 550                                | 311, 171              |
|        |                 |                                                   |                | Water         | <0.1                             | 2442                                                 | 241, 398                            | 397                                | 580                                | 339, 182              |
| 2b     | CH <sub>3</sub> | NHCH <sub>2</sub> CH <sub>3</sub>                 | Br             | Diethyl Ether | 30                               | 3733                                                 | 239, 370                            | 371                                | 474                                | 235, 104              |
|        |                 |                                                   |                | Cyclohexane   | 37                               | 3496                                                 | 239, 366                            | 364                                | 472                                | 233, 106              |
|        |                 |                                                   |                | Methanol      | 1                                | 4811                                                 | 241, 384                            | 379                                | 548                                | 307, 164              |
|        |                 |                                                   |                | Water         | <0.1                             | 3645                                                 | 241, 400                            | 397                                | 583                                | 342, 183              |
| 2c     | CH <sub>3</sub> | NHCH <sub>2</sub> CH <sub>3</sub>                 | I              | Diethyl Ether | 8                                | 4419                                                 | 237, 370                            | 368                                | 487                                | 250, 117              |
|        |                 |                                                   |                | Cyclohexane   | 11                               | 3483                                                 | 239, 372                            | 363                                | 472                                | 233, 100              |
|        |                 |                                                   |                | Methanol      | 1                                | 3405                                                 | 238, 388                            | 383                                | 560                                | 322, 172              |
|        |                 |                                                   |                | Water         | <0.1                             | 2925                                                 | 238, 404                            | 396                                | 580                                | 342, 176              |
| 2d     | H               | NH(CH <sub>2</sub> ) <sub>3</sub> CH <sub>3</sub> | Cl             | Diethyl Ether | 42                               | 5073                                                 | 226, 359                            | 355                                | 461                                | 235, 102              |
|        |                 |                                                   |                | Cyclohexane   | 65                               | 4220                                                 | 226, 356                            | 352                                | 442                                | 216, 72               |
|        |                 |                                                   |                | Methanol      | 1                                | 4313                                                 | 229, 374                            | 370                                | 512                                | 283, 142              |
|        |                 |                                                   |                | Water         | <0.1                             | 2867                                                 | 228, 387                            | 387                                | 550                                | 322, 180              |
| 2e     | H               | NH(CH <sub>2</sub> ) <sub>3</sub> CH <sub>3</sub> | Br             | Diethyl Ether | 31                               | 5531                                                 | 226, 358                            | 358                                | 461                                | 235, 103              |
|        |                 |                                                   |                | Cyclohexane   | 47                               | 4489                                                 | 226, 355                            | 351                                | 441                                | 215, 86               |
|        |                 |                                                   |                | Methanol      | 2                                | 4451                                                 | 229, 374                            | 367                                | 513                                | 284, 139              |
|        |                 |                                                   |                | Water         | <0.1                             | 2768                                                 | 228, 387                            | 387                                | 547                                | 319, 160              |
| 3a     | CH <sub>3</sub> | OCH <sub>2</sub> CH <sub>3</sub>                  | Cl             | Diethyl Ether | 12                               | 770                                                  | 230, 335                            | 332                                | 458                                | 228, 123              |
|        |                 |                                                   |                | Cyclohexane   | 24                               | 875                                                  | 237, 330                            | 332                                | 461                                | 224, 131              |
|        |                 |                                                   |                | Methanol      | 2                                | 825                                                  | 236, 333                            | 330                                | 486                                | 250, 153              |
|        |                 |                                                   |                | Water         | <0.1                             | 548                                                  | 236, 342                            | 341                                | 505                                | 269, 163              |
| 3b     | CH <sub>3</sub> | OCH <sub>2</sub> CH <sub>3</sub>                  | Br             | Diethyl Ether | 10                               | 666                                                  | 230, 336                            | 332                                | 458                                | 228, 122              |
|        |                 |                                                   |                | Cyclohexane   | 24                               | 668                                                  | 238, 333                            | 332                                | 461                                | 223, 128              |
|        |                 |                                                   |                | Methanol      | 2                                | 629                                                  | 237, 335                            | 332                                | 486                                | 249, 151              |
|        |                 |                                                   |                | Water         | <0.1                             | 432                                                  | 236, 343                            | 344                                | 501                                | 265, 158              |
| 3c     | CH <sub>3</sub> | OCH <sub>2</sub> Ph                               | Cl             | Diethyl Ether | 12                               | 1267                                                 | 232, 335                            | 334                                | 464                                | 232, 129              |
| 3d     | CH <sub>3</sub> | OCH <sub>2</sub> Ph                               | Br             | Diethyl Ether | 9                                | 907                                                  | 233, 340                            | 329                                | 465                                | 232, 125              |
| 3e     | CH <sub>3</sub> | OPh                                               | Cl             | Diethyl Ether | <0.1                             | 586                                                  | 238, 333                            | --                                 | --                                 | --                    |
| 3f     | CH <sub>3</sub> | OPh                                               | Br             | Diethyl Ether | <0.1                             | 821                                                  | 243, 325                            | --                                 | --                                 | --                    |

| Sample | R <sub>1</sub>  | R <sub>2</sub>                                    | R <sub>3</sub>                                    | Solvent       | $\Phi_f^a$<br>% | $\epsilon_{\max}$<br>M <sup>-1</sup> cm <sup>-1</sup> | $\lambda^{b}_{\text{abs}}$<br>nm | $\lambda^{b}_{\text{ex}}$<br>nm | $\lambda^{b}_{\text{em}}$<br>nm | $\Delta\lambda^c$<br>nm |
|--------|-----------------|---------------------------------------------------|---------------------------------------------------|---------------|-----------------|-------------------------------------------------------|----------------------------------|---------------------------------|---------------------------------|-------------------------|
| 4a     | CH <sub>3</sub> | NHCH <sub>2</sub> CH <sub>3</sub>                 | S(CH <sub>2</sub> ) <sub>3</sub> CH <sub>3</sub>  | Diethyl Ether | 4               | 1917                                                  | 240, 379                         | 377                             | 558                             | 318, 165                |
| 4b     | CH <sub>3</sub> | NHCH <sub>2</sub> CH <sub>3</sub>                 | S(CH <sub>2</sub> ) <sub>17</sub> CH <sub>3</sub> | Diethyl Ether | 6               | 2790                                                  | 232, 383                         | 377                             | 561                             | 329, 160                |
| 4c     | CH <sub>3</sub> | NHCH <sub>2</sub> CH <sub>3</sub>                 | SPh                                               | Diethyl Ether | 12              | 1761                                                  | 230, 370                         | 364                             | 545                             | 315, 160                |
| 4d     | CH <sub>3</sub> | NHCH <sub>2</sub> CH <sub>3</sub>                 | SPhCH <sub>3</sub>                                | Diethyl Ether | 12              | 2595                                                  | 236, 370                         | 367                             | 547                             | 311, 161                |
| 4e     | CH <sub>3</sub> | NHCH <sub>2</sub> CH <sub>3</sub>                 | SCH <sub>2</sub> Ph                               | Diethyl Ether | 4               | 2130                                                  | 238, 381                         | 378                             | 564                             | 326, 164                |
| 4f     | CH <sub>3</sub> | NH(CH <sub>2</sub> ) <sub>3</sub> CH <sub>3</sub> | SPh                                               | Diethyl Ether | 9               | 3898                                                  | 246, 368                         | 359                             | 544                             | 298, 160                |
| 4g     | CH <sub>3</sub> | NHPh                                              | SPh                                               | Diethyl Ether | <0.1            | 4202                                                  | 230, 398                         | --                              | --                              | --                      |
| 4h     | H               | NH(CH <sub>2</sub> ) <sub>3</sub> CH <sub>3</sub> | SPh                                               | Diethyl Ether | 23              | 2685                                                  | 230, 355                         | 355                             | 526                             | 296, 157                |
|        |                 |                                                   |                                                   | Cyclohexane   | 37              | 4743                                                  | 241, 355                         | 347                             | 513                             | 272, 147                |
|        |                 |                                                   |                                                   | Methanol      | <0.1            | 4269                                                  | 241, 370                         | 364                             | 593                             | 352, 223                |
|        |                 |                                                   |                                                   | Water         | --              | --                                                    | --                               | --                              | --                              | --                      |
| 4i     | H               | NHCH <sub>2</sub> CH <sub>3</sub>                 | S(CH <sub>2</sub> ) <sub>3</sub> CH <sub>3</sub>  | Diethyl Ether | 13              | 4363                                                  | 227, 378                         | 369                             | 535                             | 308, 147                |
| 4j     | H               | NHCH <sub>2</sub> CH <sub>3</sub>                 | SCH <sub>2</sub> Ph                               | Diethyl Ether | 17              | 2276                                                  | 224, 370                         | 367                             | 532                             | 308, 152                |

<sup>a</sup> Relative fluorescent quantum yield measured using quinine sulfate as reference ( $\Phi_f = 59\%$ , in 0.105 M HClO<sub>4</sub>).<sup>6</sup>

<sup>b</sup> The absorption, excitation and emission wavelength were recorded at 10  $\mu\text{M}$  in diethyl ether, slit width ex 5 nm, em 5 nm.

<sup>c</sup> Stokes shift in diethyl ether solution (10  $\mu\text{M}$ ).



#### 4. UV-VIS SPECTRUM OF MALEIMIDES

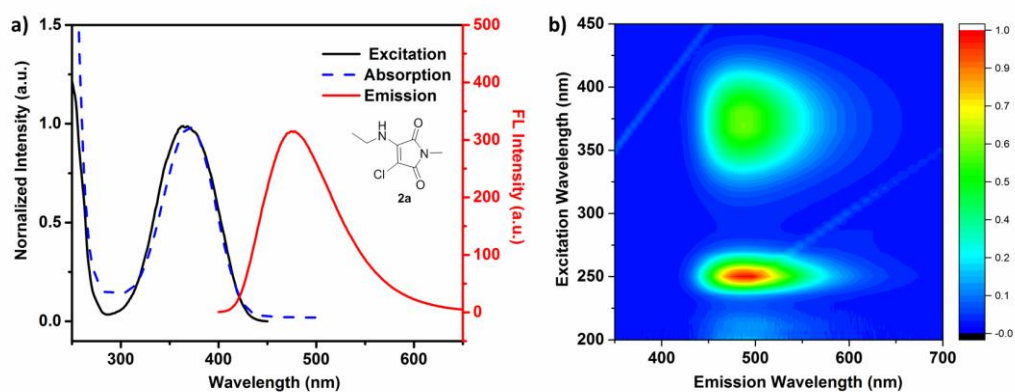

Figure S1. a) Excitation, emission and absorption spectra of **2a** in diethyl ether at 10  $\mu\text{M}$ ; b) 2D excitation-emission spectra (with a 5 nm step) of **2a** in diethyl ether at 10  $\mu\text{M}$ . Peaks at  $\lambda_{\text{ex}} = \lambda_{\text{em}}$  are due to Rayleigh scattering from the sample solution.

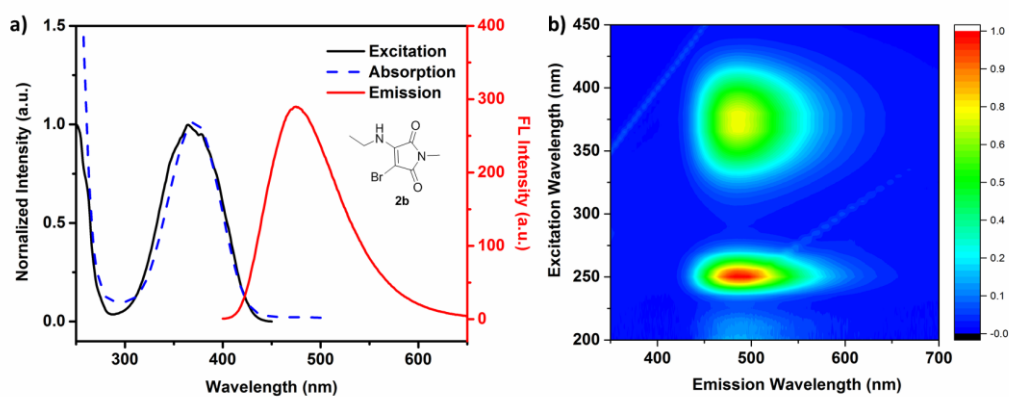

Figure S2. a) Excitation, emission and absorption spectra of **2b** in diethyl ether at 10  $\mu\text{M}$ ; b) 2D excitation-emission spectra (with a 5 nm step) of **2b** in diethyl ether at 10  $\mu\text{M}$ . Peaks at  $\lambda_{\text{ex}} = \lambda_{\text{em}}$  are due to Rayleigh scattering from the sample solution.

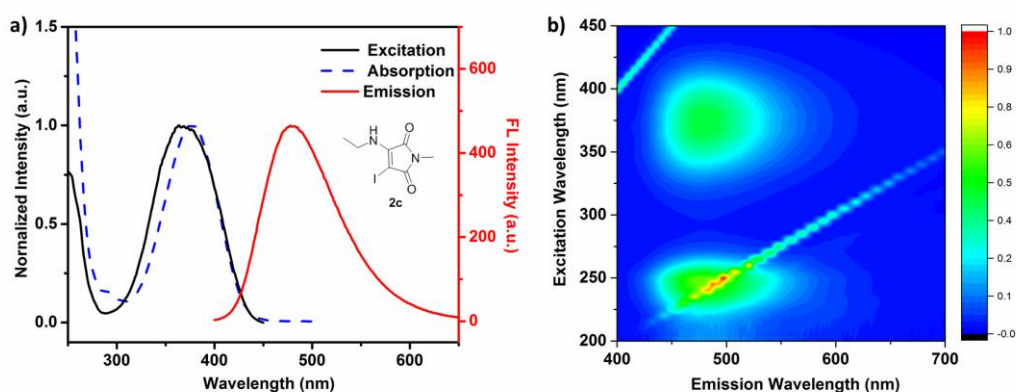

Figure S3. a) Excitation, emission and absorption spectra of **2c** in diethyl ether at 10  $\mu\text{M}$ ; b) 2D excitation-emission spectra (with a 5 nm step) of **2c** in diethyl ether at 10  $\mu\text{M}$ . Peaks at  $\lambda_{\text{ex}} = \lambda_{\text{em}}$  are due to Rayleigh scattering from the sample solution.

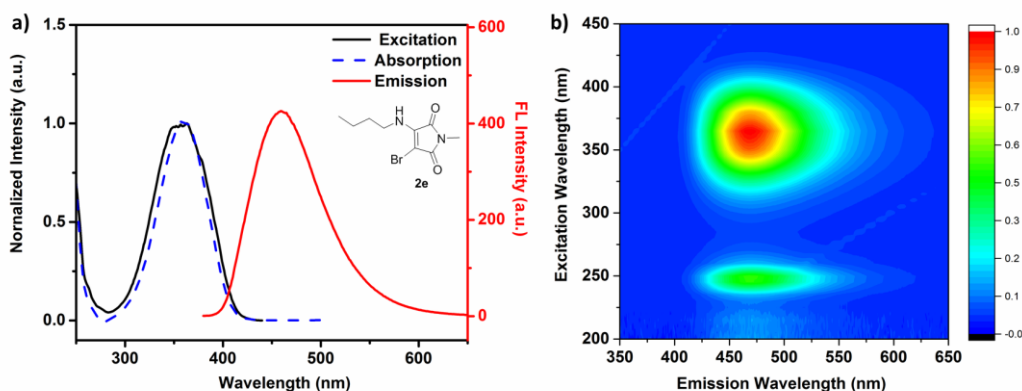

Figure S4. a) Excitation, emission and absorption spectra of **2e** in diethyl ether at 10  $\mu\text{M}$ ; b) 2D excitation-emission spectra (with a 5 nm step) of **2e** in diethyl ether at 10  $\mu\text{M}$ . Peaks at  $\lambda_{\text{ex}} = \lambda_{\text{em}}$  are due to Rayleigh scattering from the sample solution.

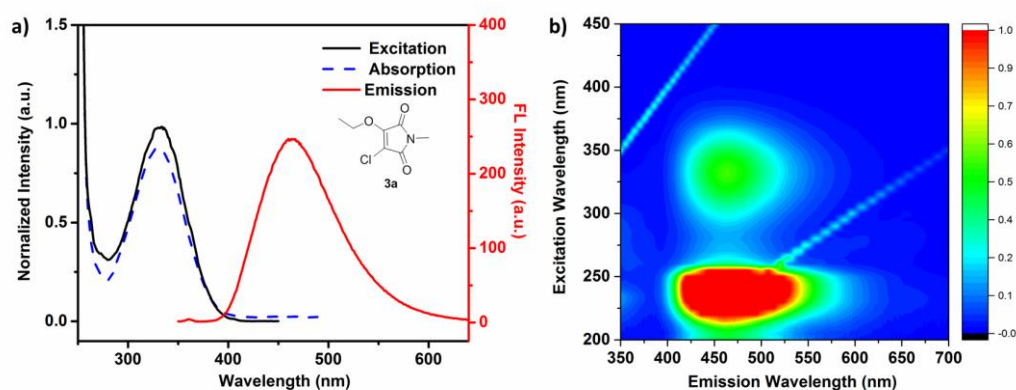

Figure S5. a) Excitation, emission and absorption spectra of **3a** in diethyl ether at 10  $\mu\text{M}$ ; b) 2D excitation-emission spectra (with a 5 nm step) of **3a** in diethyl ether at 10  $\mu\text{M}$ . Peaks at  $\lambda_{\text{ex}} = \lambda_{\text{em}}$  are due to Rayleigh scattering from the sample solution.

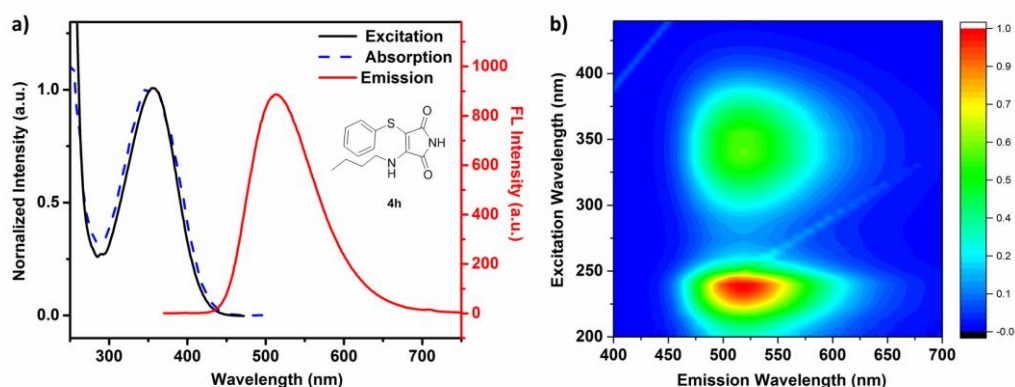

Figure S6. a) Excitation, emission and absorption spectra of **4h** in diethyl ether at 10  $\mu\text{M}$ ; b) 2D excitation-emission spectra (with a 5 nm step) of **4h** in diethyl ether at 10  $\mu\text{M}$ . Peaks at  $\lambda_{\text{ex}} = \lambda_{\text{em}}$  are due to Rayleigh scattering from the sample solution.

## 5. SOLVATOCHROMIC DETERMINATION

The emission spectra of each compound in different solvents was recorded using the corresponding absorption peak as the excitation wavelength. (CH= cyclohexane, DE= diethyl ether, THF=tetrahydrofuran, MeOH=Methanol, DMF= Dimethylformamide,)

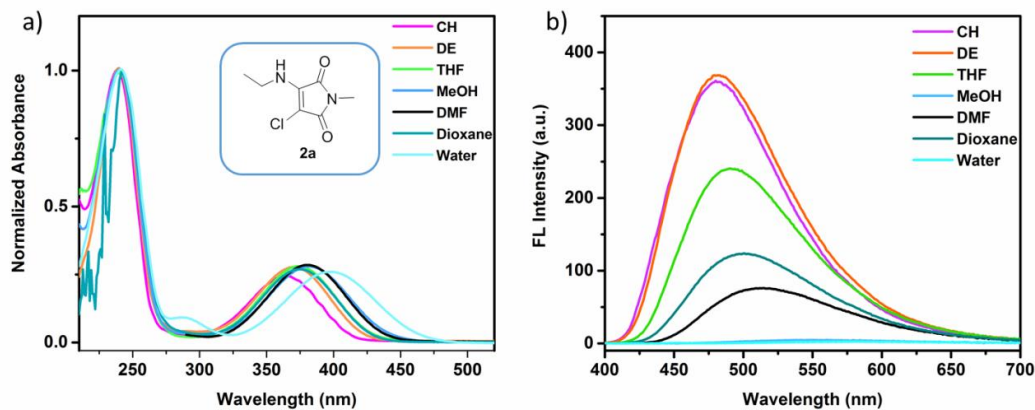

Figure S7. Absorption (a) and emission (b) spectra of **2a** in different solvents at 10  $\mu\text{M}$ .

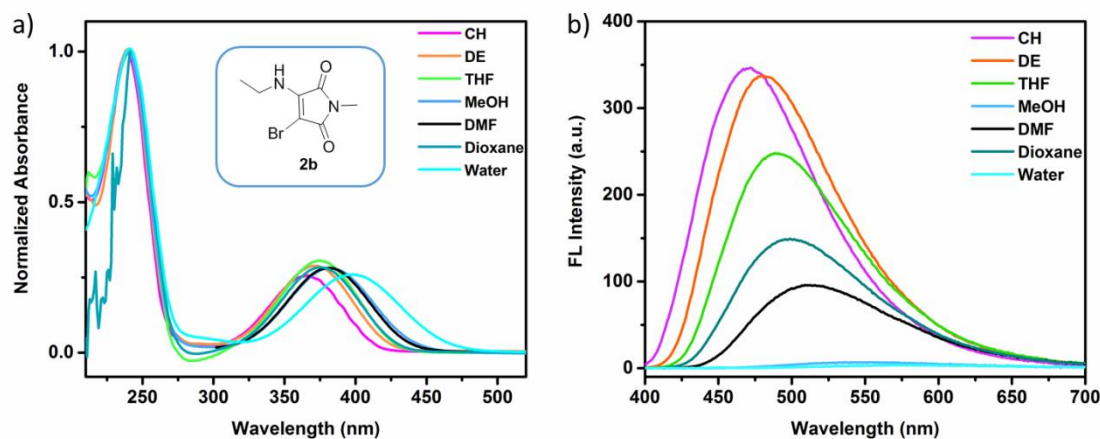

Figure S8. Absorption (a) and emission (b) spectra of **2b** in different solvents at 10  $\mu\text{M}$ .

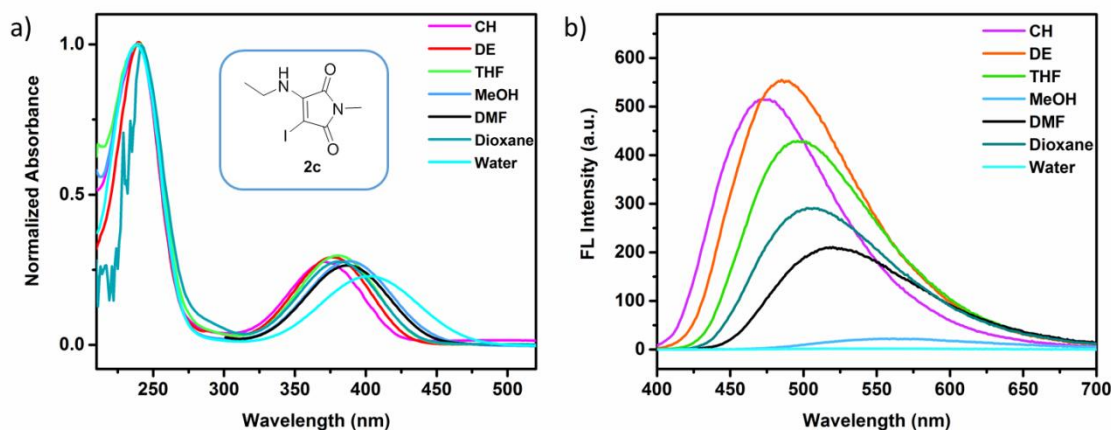

Figure S9. Absorption (a) and emission (b) spectra of **2c** in different solvents at 10  $\mu\text{M}$ .

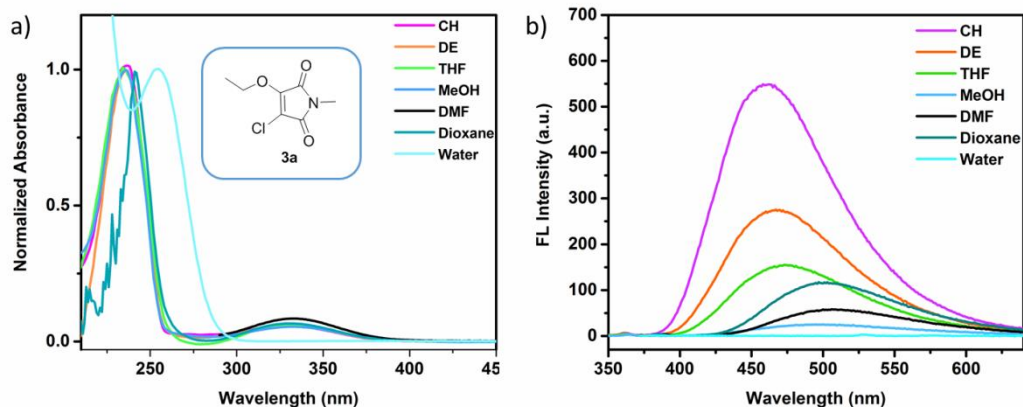

Figure S10. Absorption (a) and emission (b) spectra of **3a** in different solvents at 10  $\mu\text{M}$ .

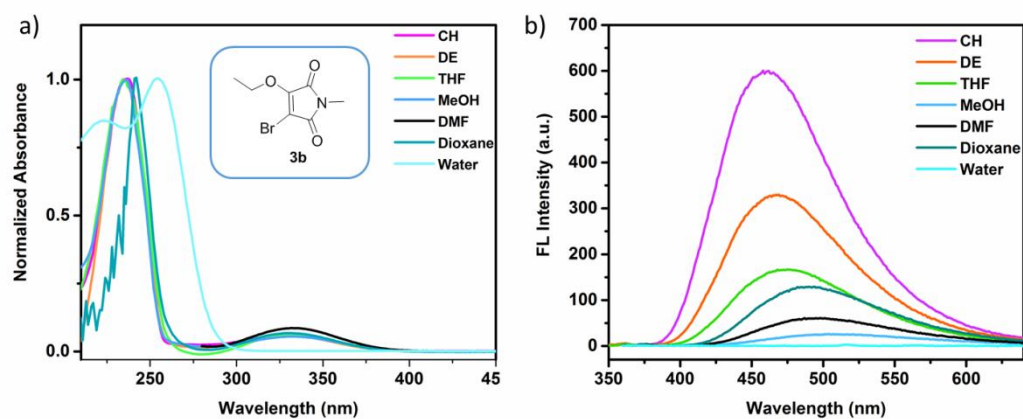

Figure S11. Absorption (a) and emission (b) spectra of **3b** in different solvents at 10  $\mu\text{M}$ .

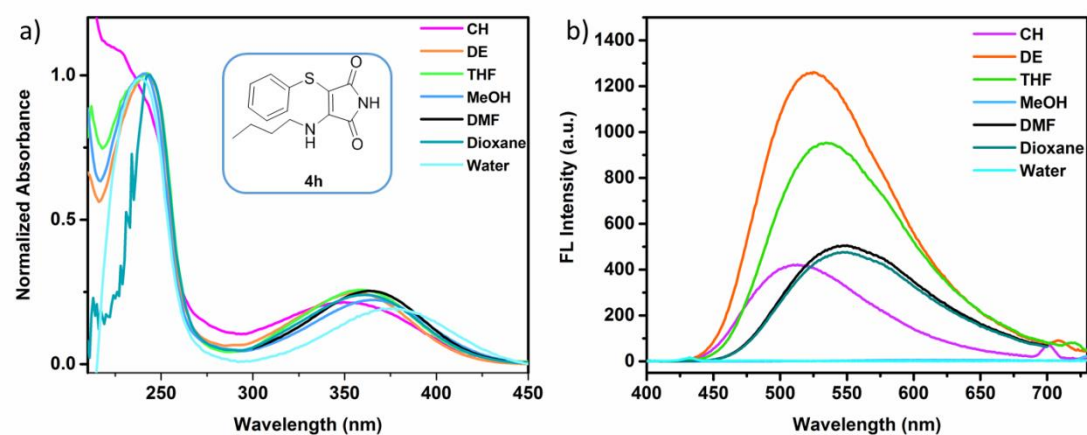

Figure S12. Absorption (a) and emission (b) spectra of **4h** in different solvents at 10  $\mu\text{M}$ .

## 6. PHOTOGRAPHS IN DIFFERENT SOLVENTS UNDER UV LIGHT

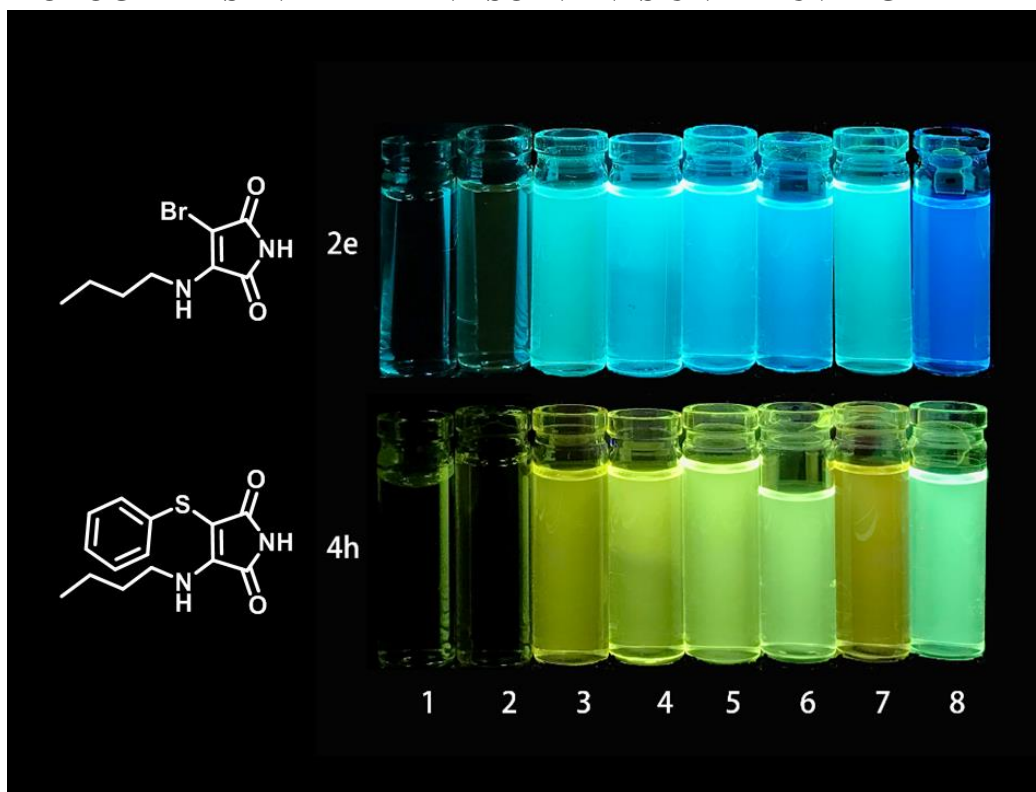

Figure S13. Photographs of ABM (**2e**) and ATM (**4h**) in different solvents under the 365 nm hand-held UV lamp. 1-8: water, methanol, DMF, dioxane, THF, diethyl ether,  $\text{CH}_2\text{Cl}_2$  and cyclohexane.

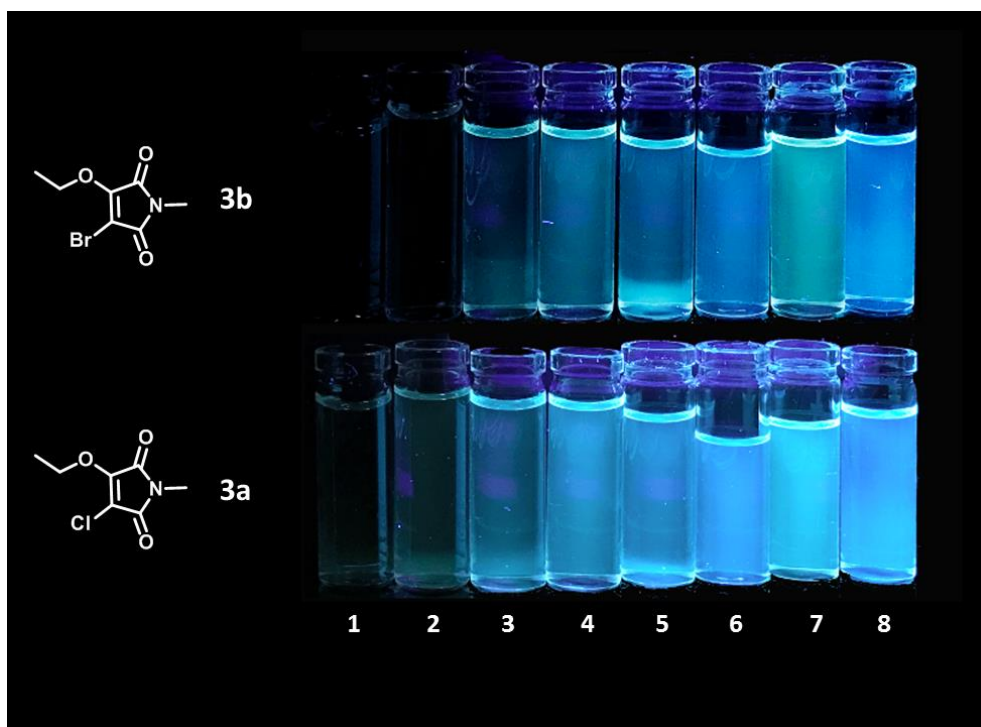

Figure S14. Photographs of OBM (**3b**) and OCM (**3a**) in different solvents under the 365 nm hand-held UV lamp. 1-8: water, methanol, DMF, dioxane, THF, diethyl ether,  $\text{CH}_2\text{Cl}_2$  and cyclohexane.

## 7. DSE EFFECT OF SECOND THIOL SUBSTITUTED AMINO MALEIMIDES

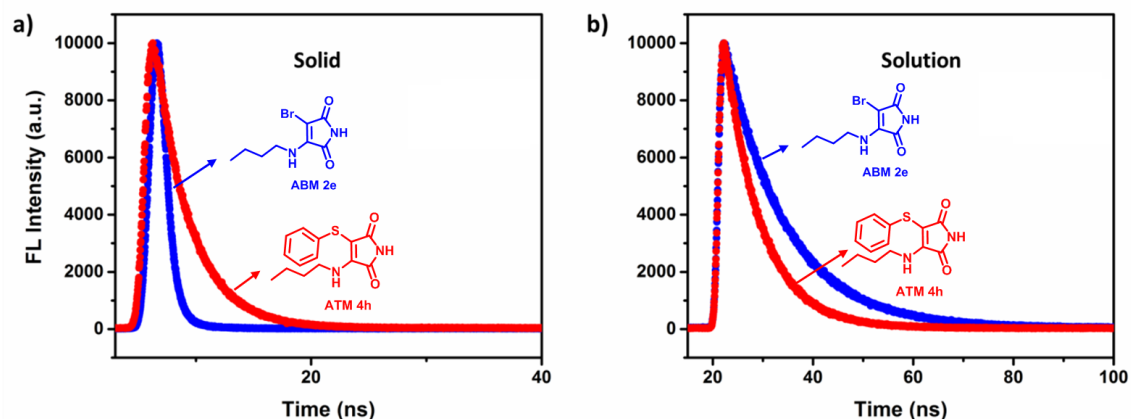

Figure S15. Fluorescent lifetimes of ATM (**4h**) and ABM (**2e**) in solid and solution states (10  $\mu$ M in dioxane).

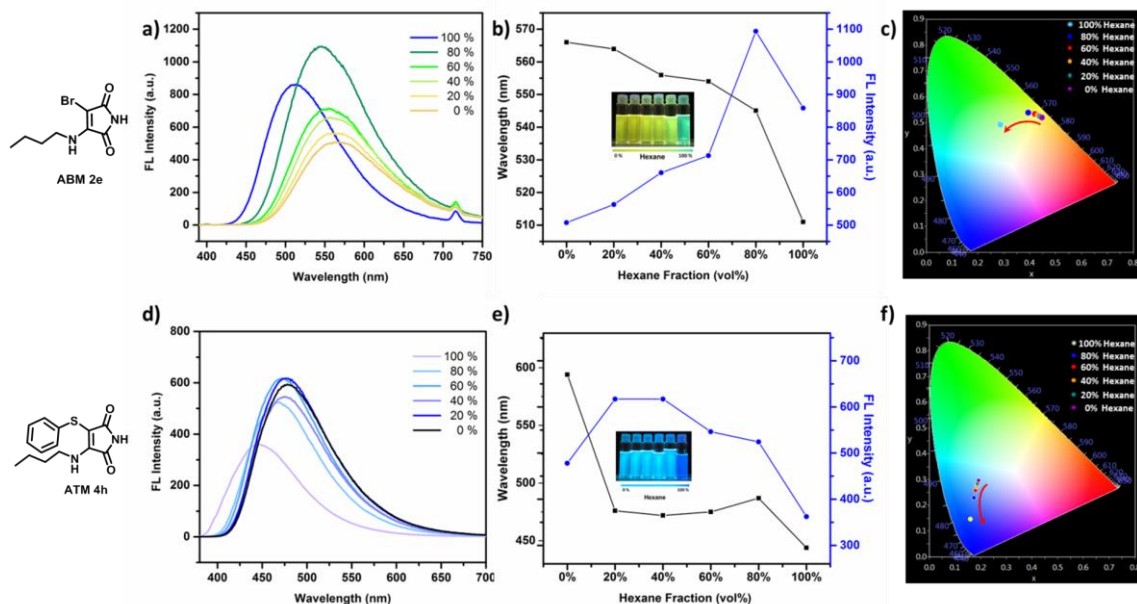

Figure S16. a) Fluorescence spectra of thiophenol substituted aminomaleimide (**4h**) in different ratios of hexane/ $\text{CH}_2\text{Cl}_2$  solution (0-100% hexane); b) Intensity and wavelength changes in different ratios of hexane/ $\text{CH}_2\text{Cl}_2$  solutions; (insert images are **4h** under UV light in the solutions); (20  $\mu$ M,  $\lambda_{\text{ex}}$  358 nm, slit width ex:5 nm, em:5 nm); c) CIE diagram of the fluorescent wavelength shift for **4h** upon changing the solvent quality. d) Fluorescence spectra of aminobromomaleimide (**2e**) in different ratios of hexane/ $\text{CH}_2\text{Cl}_2$  solution (0-100% hexane); e) Intensity and wavelength changes in different ratios of hexane/ $\text{CH}_2\text{Cl}_2$  solutions; (insert images are **2e** under UV light in the solutions); (20  $\mu$ M,  $\lambda_{\text{ex}}$  362 nm, slit width ex:5 nm, em:5 nm); f) CIE diagram of fluorescent wavelength shift for **2e** upon changing the solvent quality.

## 8. NMR SPECTRA OF SUBSTITUTED MALEIMIDES

### 3-chloro-4-(ethylamino)-1-methyl-1H-pyrrole-2,5-dione (2a):

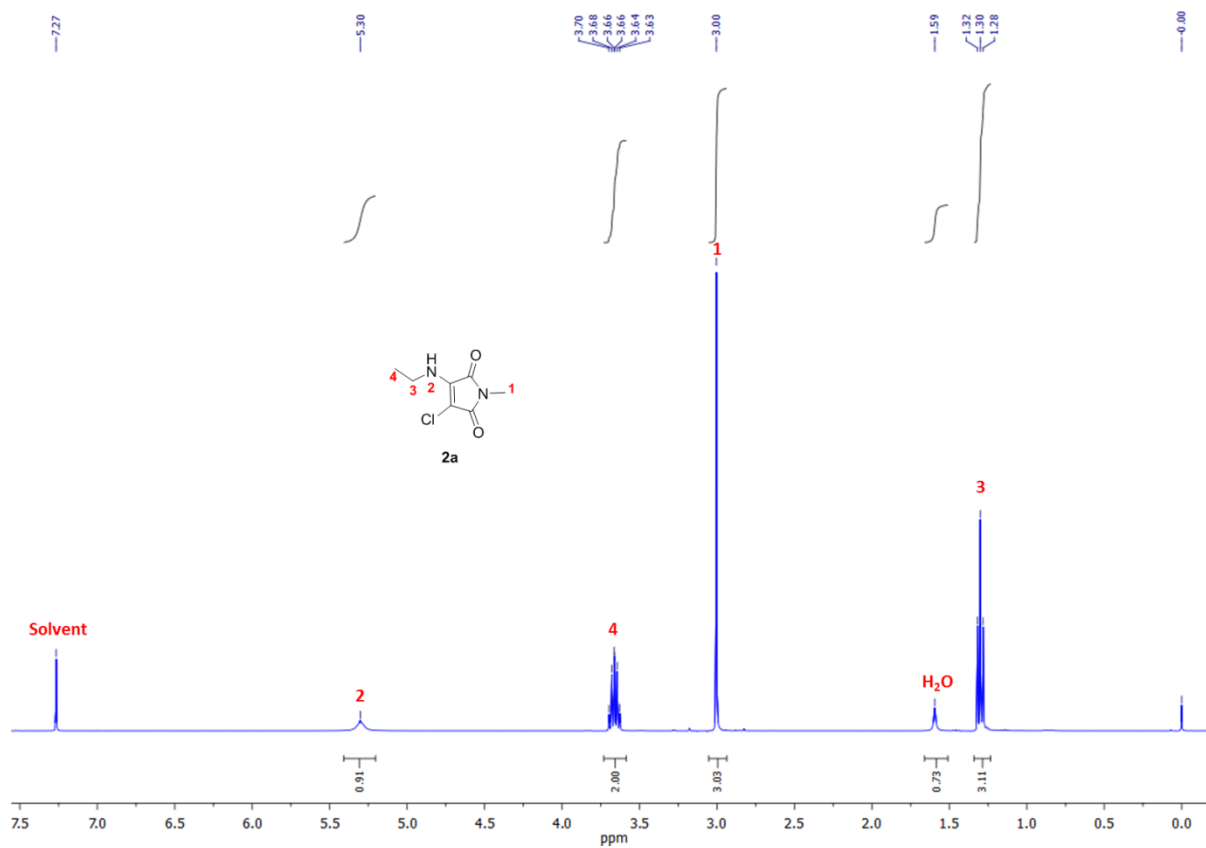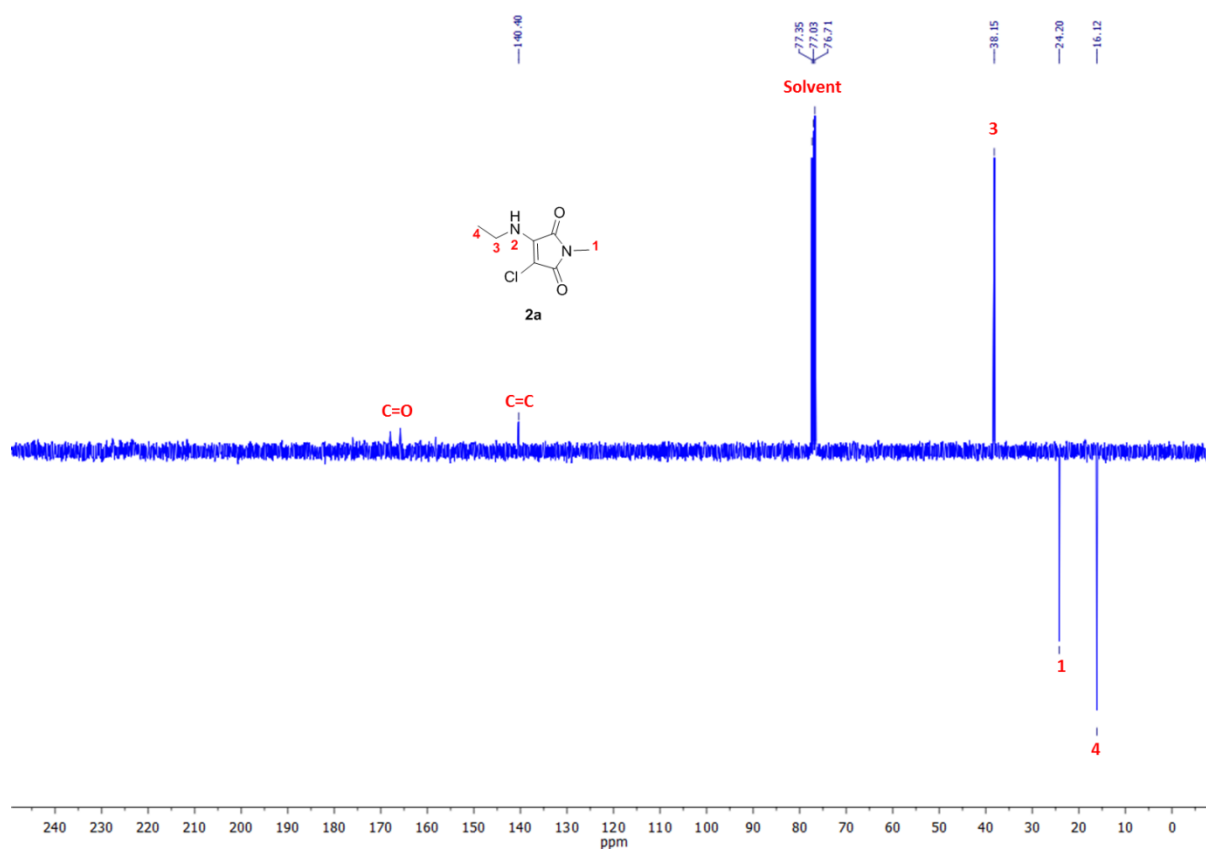

**3-bromo-4-(ethylamino)-1-methyl-1H-pyrrole-2,5-dione (2b):**

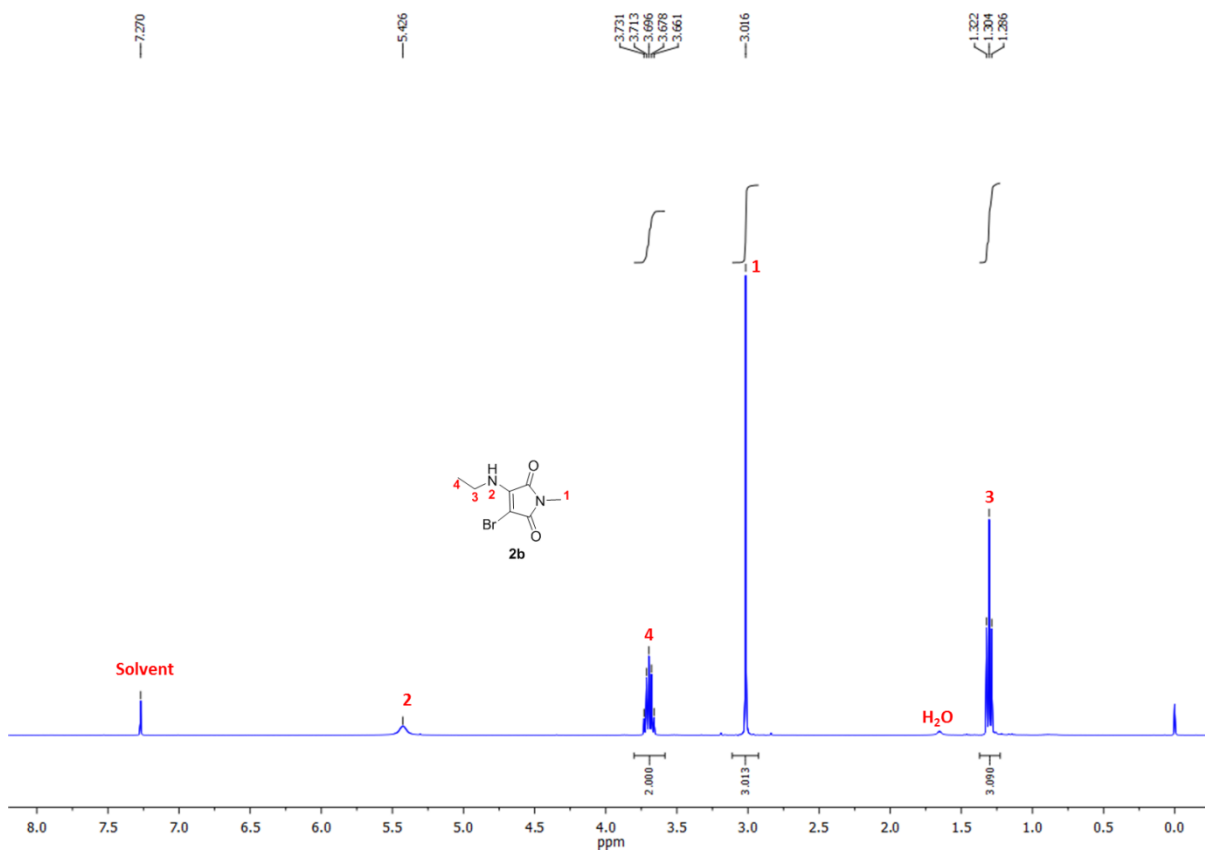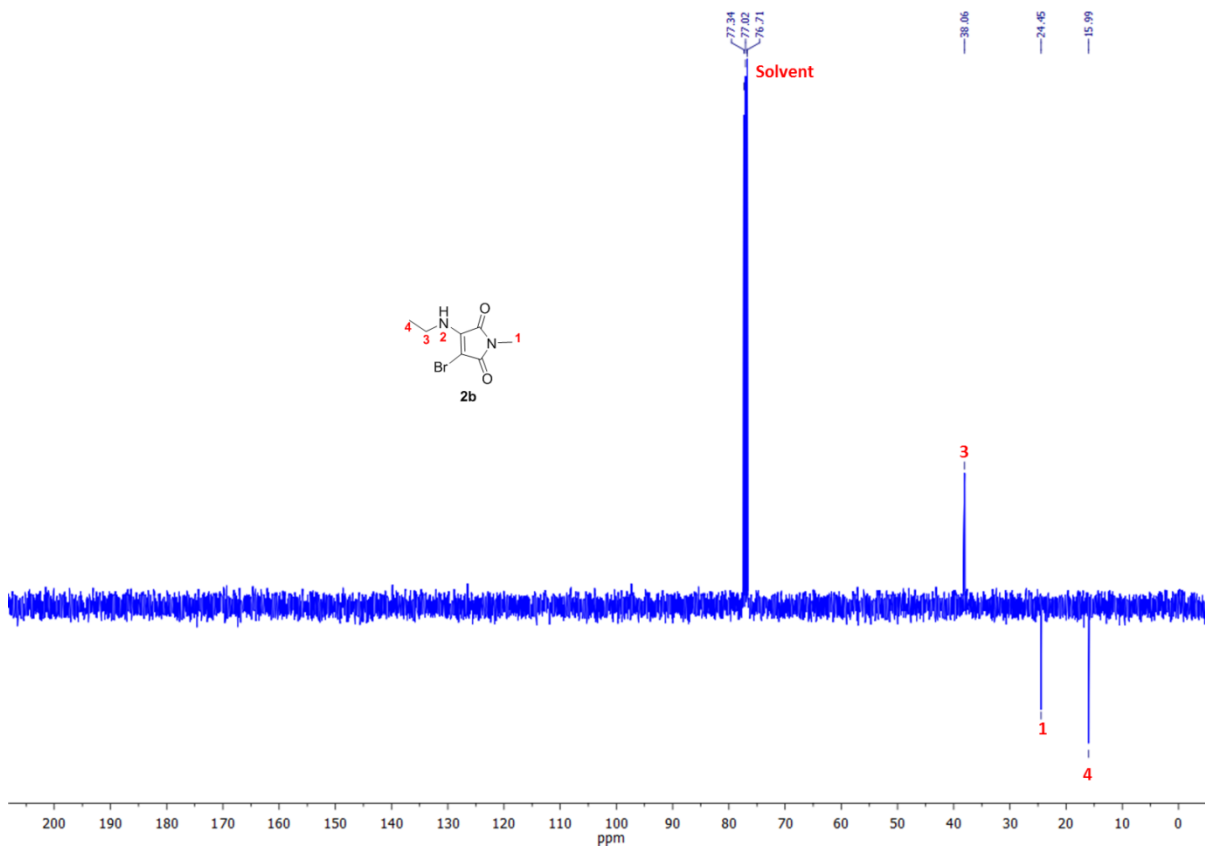



### 3-iodo-4-(ethylamino)-1-methyl-1H-pyrrole-2,5-dione (2c):

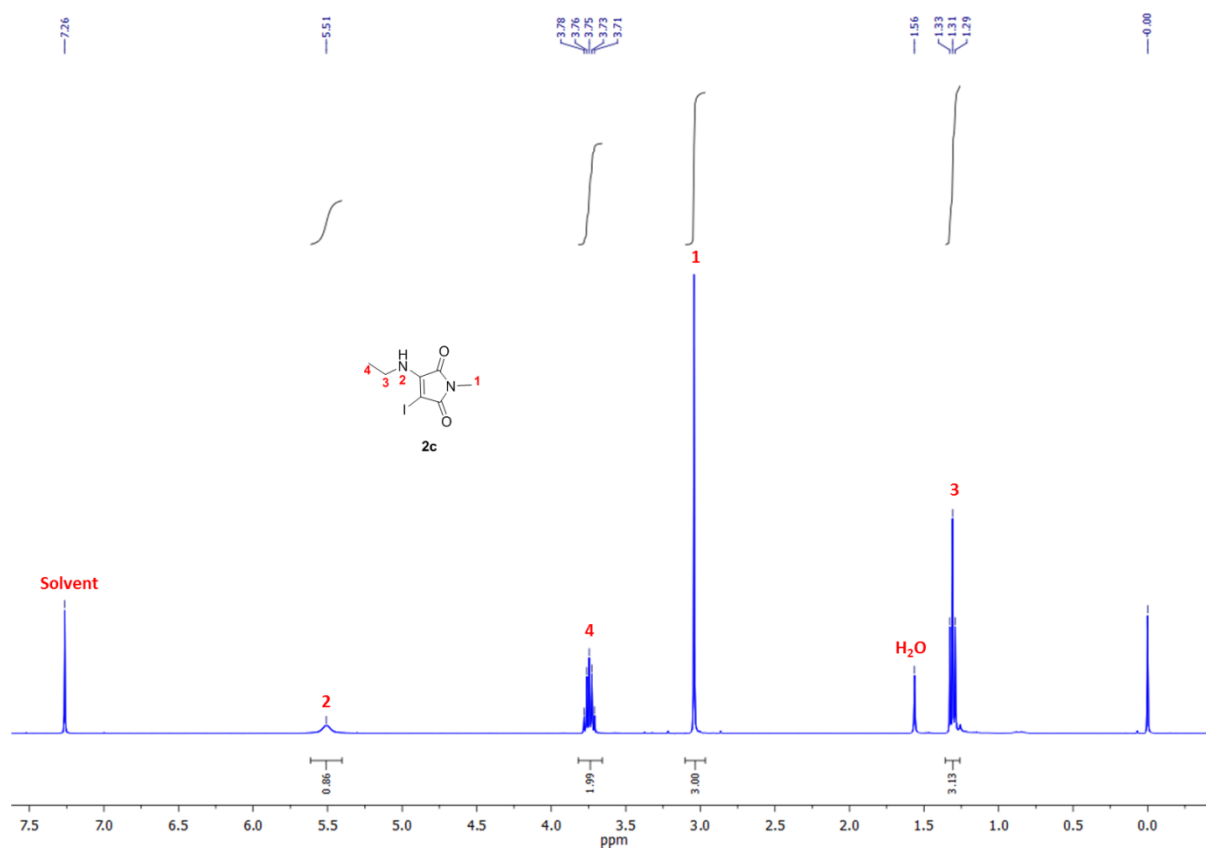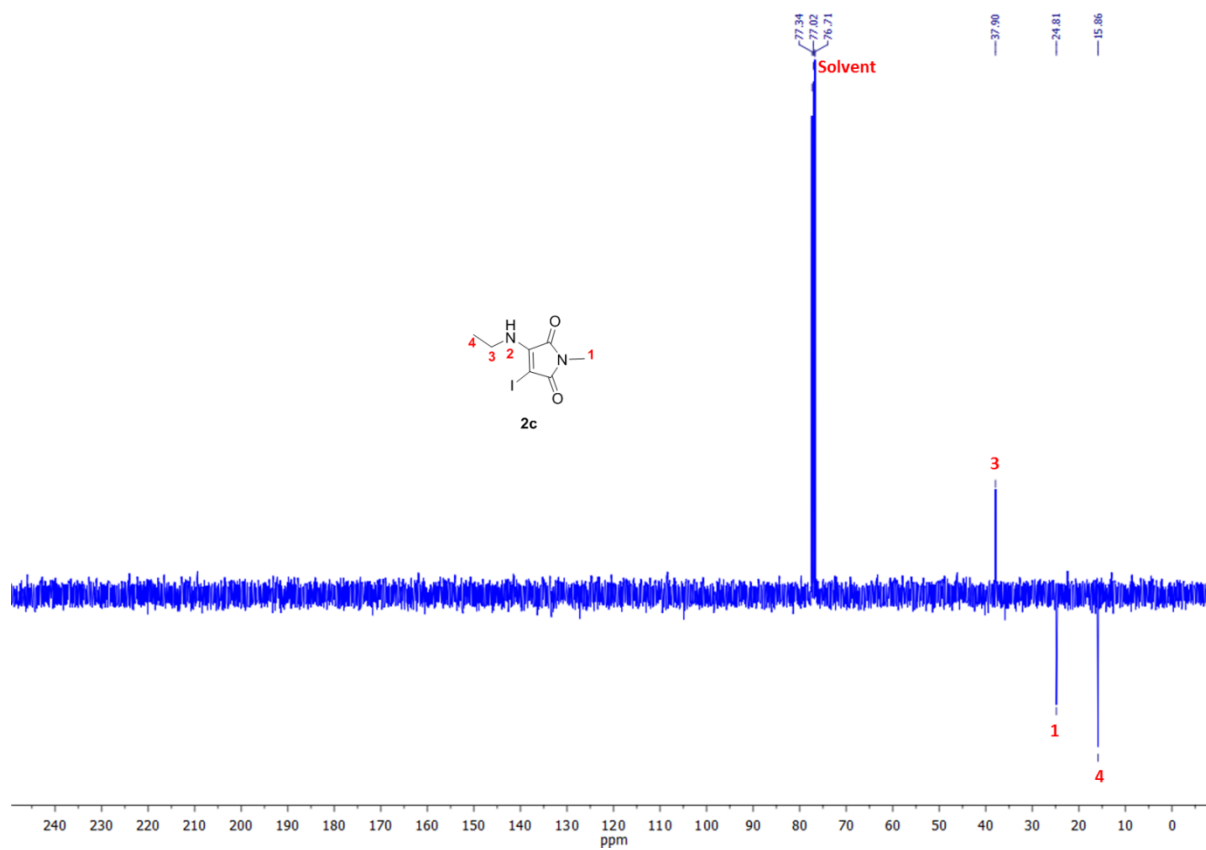

### 3-(butylamino)-4-chloro-1-methyl-1H-pyrrole-2,5-dione (2d):

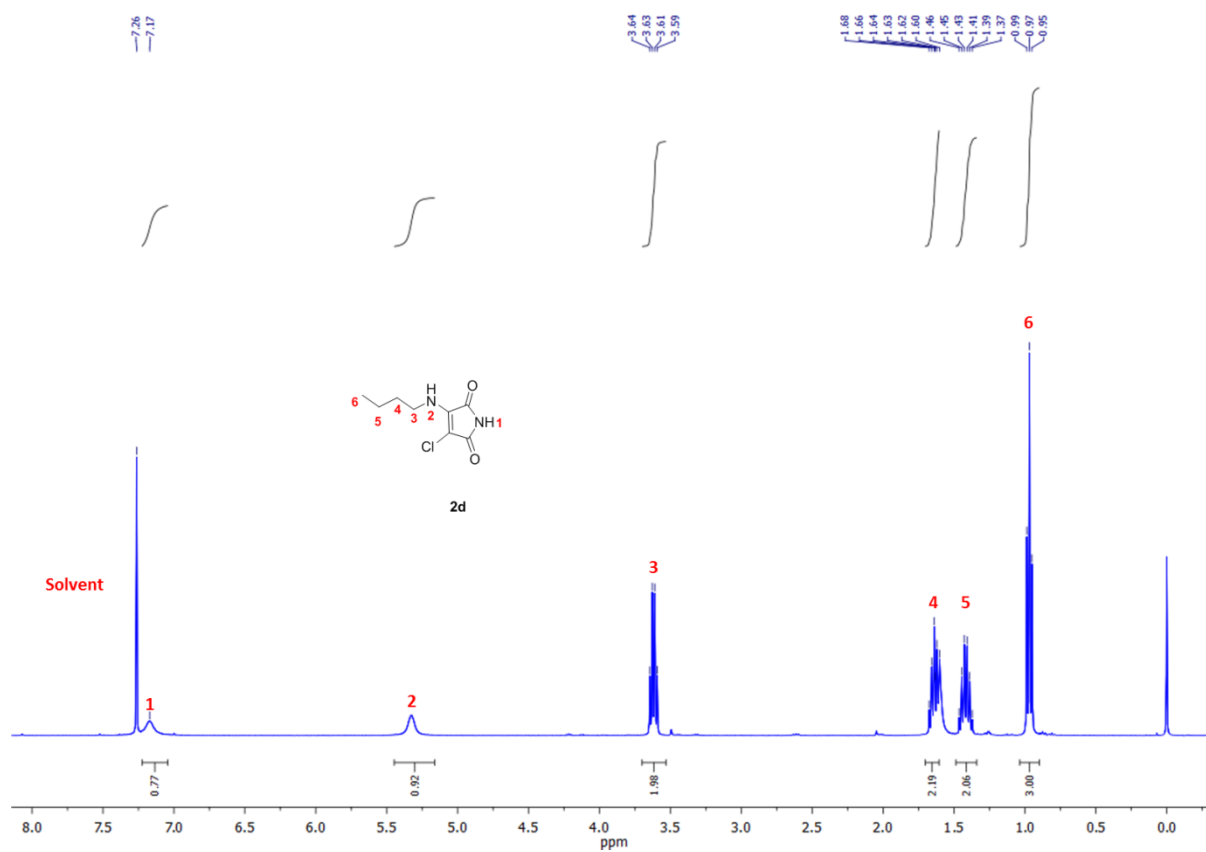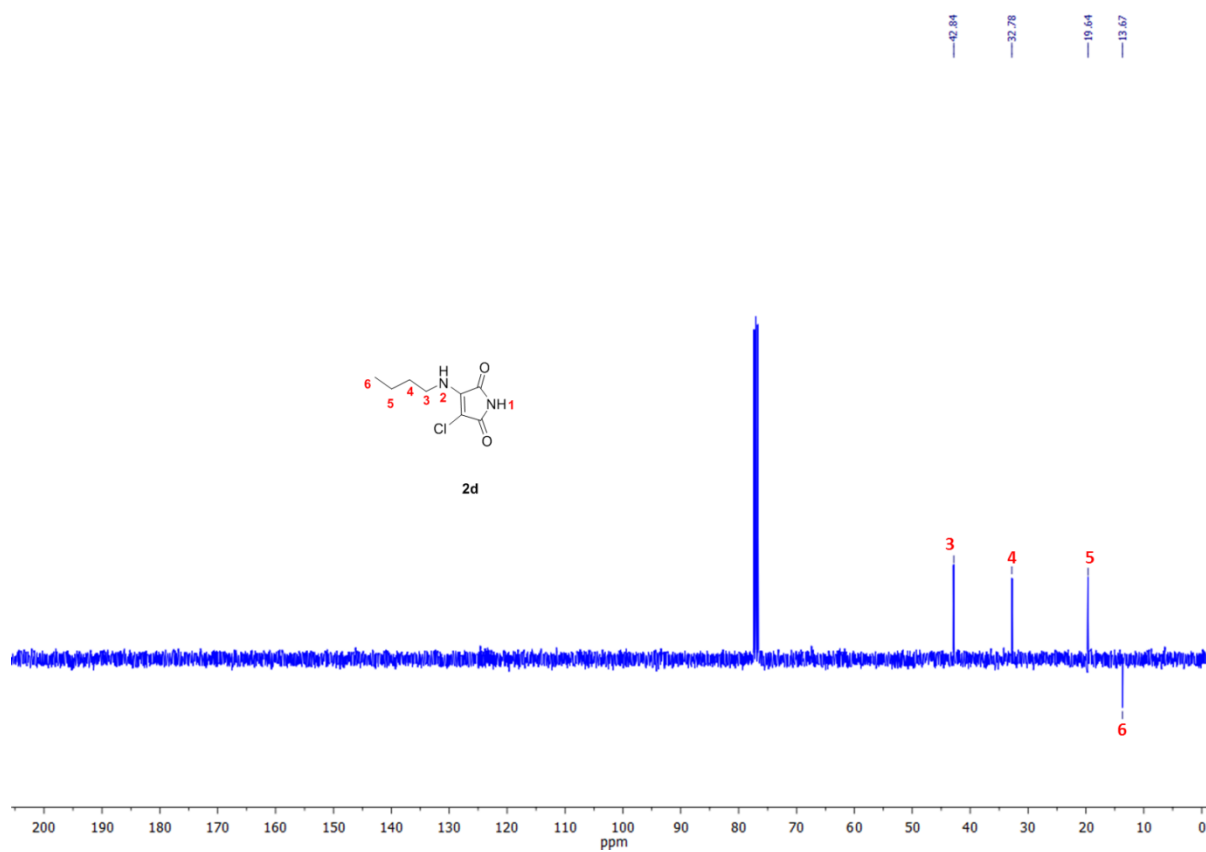

### 3-bromo-4-(butylamino)-1H-pyrrole-2,5-dione (2e)

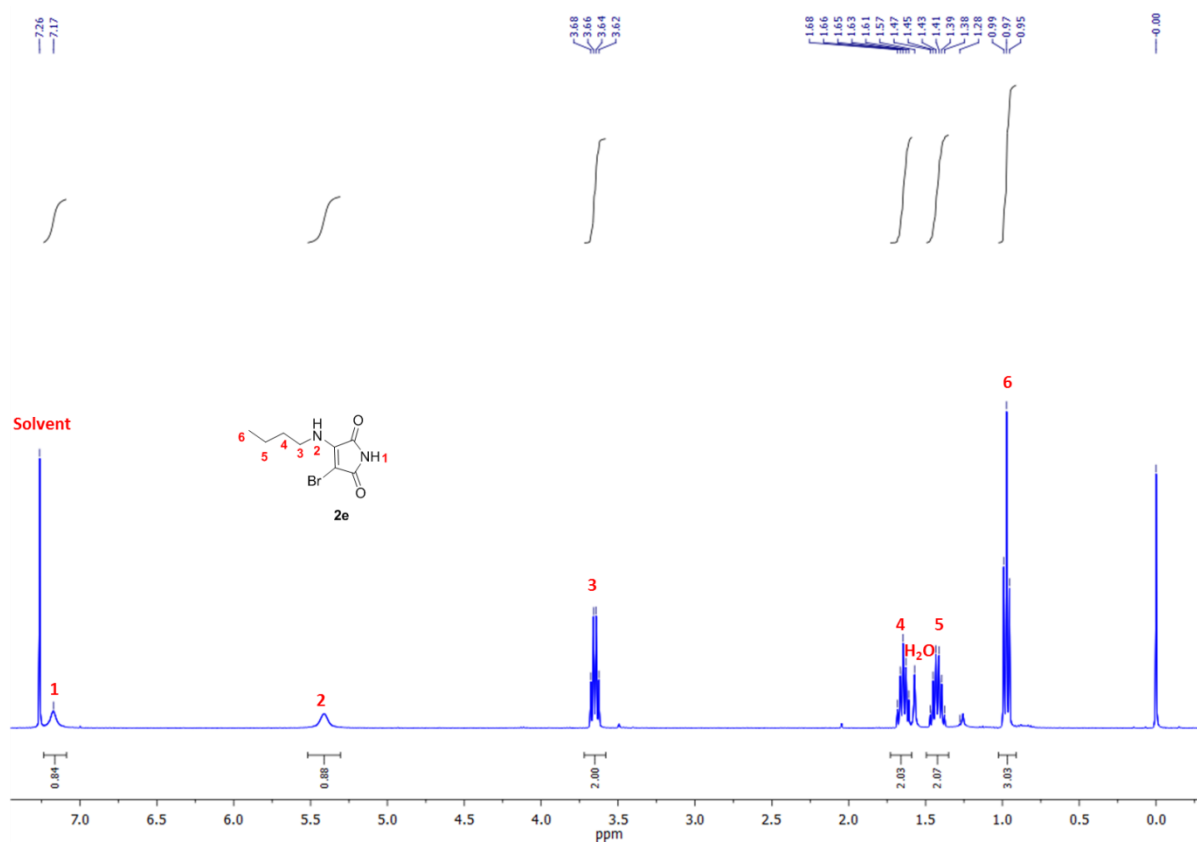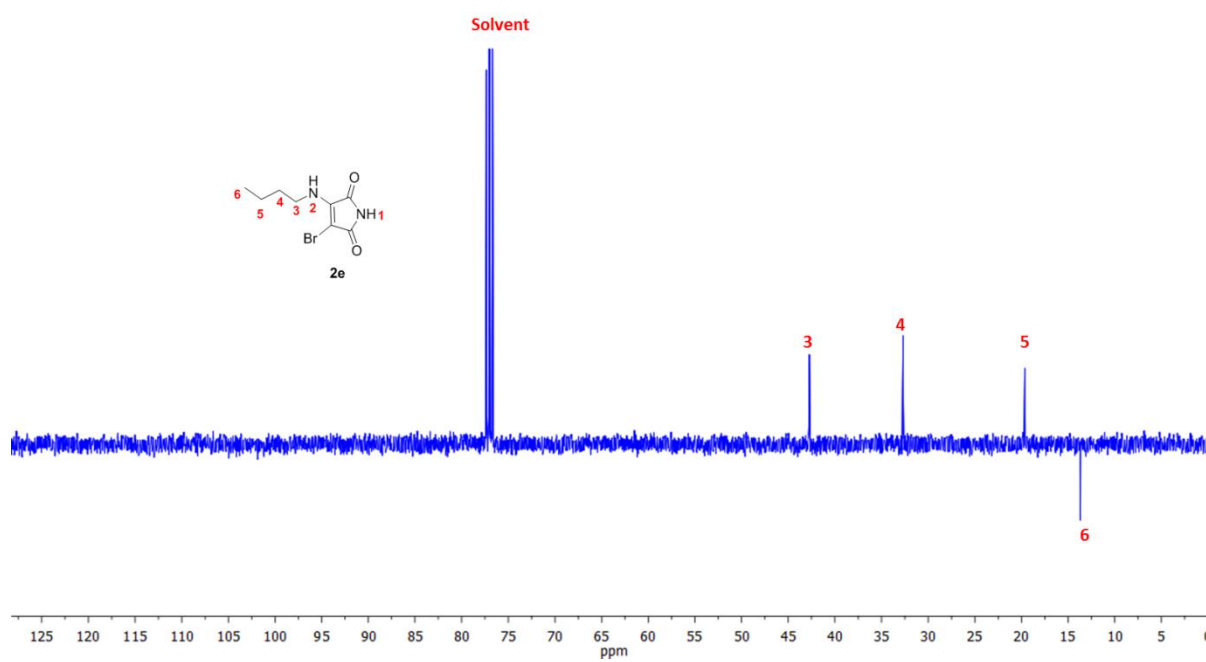

### 3-chloro-4-ethoxy-1-methyl-1H-pyrrole-2,5-dione (3a)

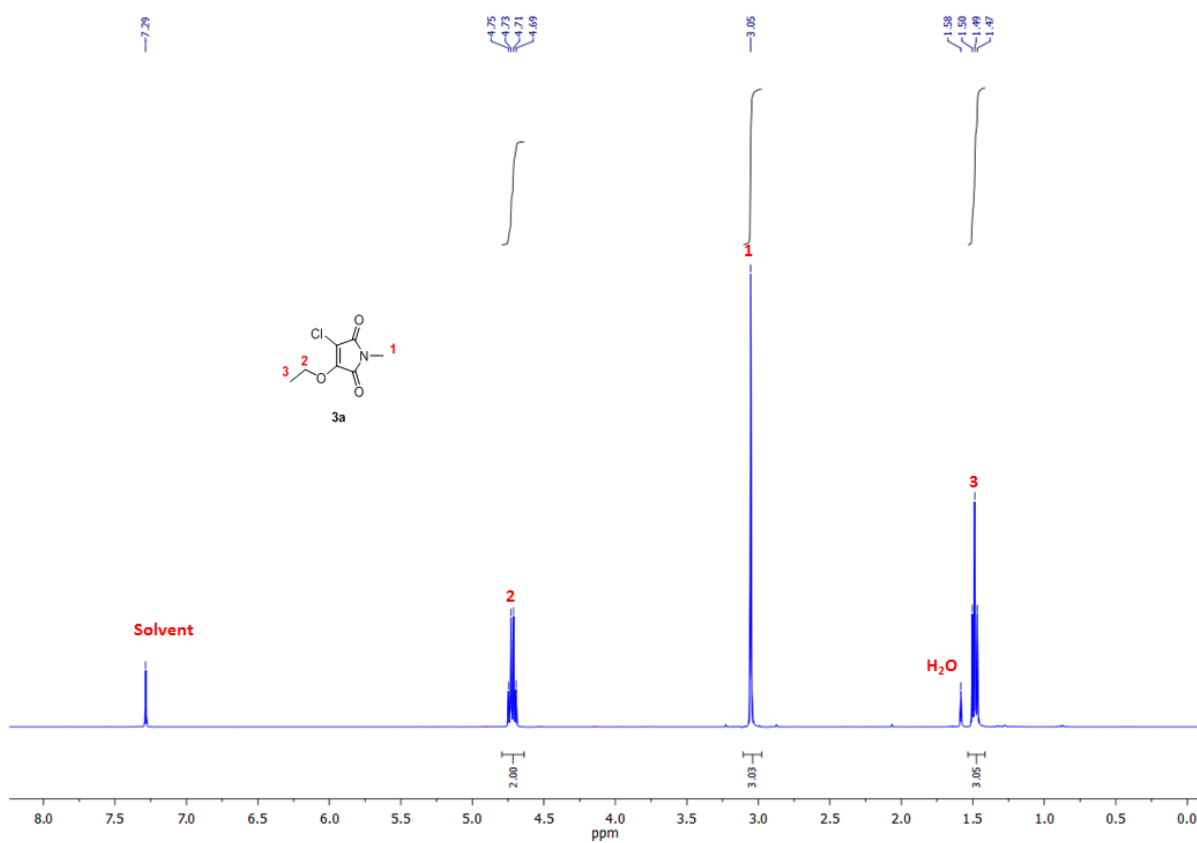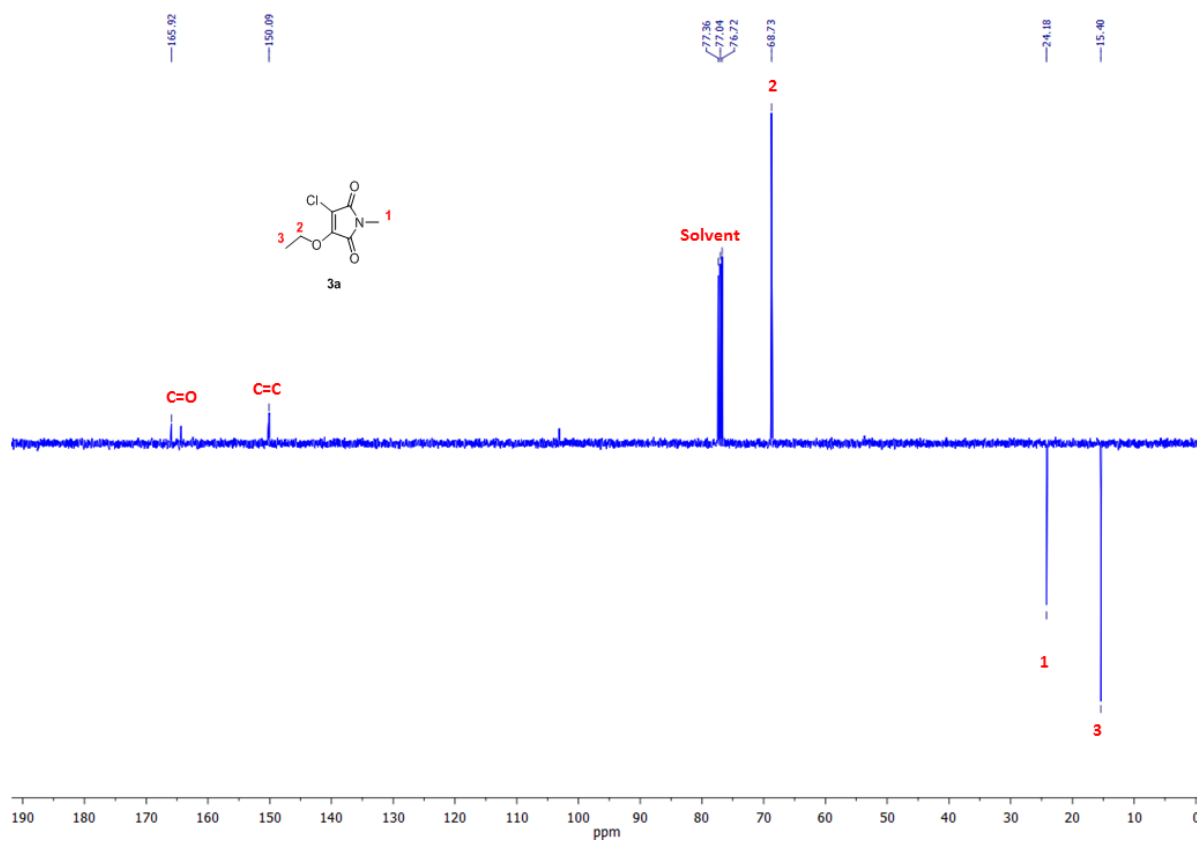

### 3-bromo-4-ethoxy-1-methyl-1H-pyrrole-2, 5-dione (3b)

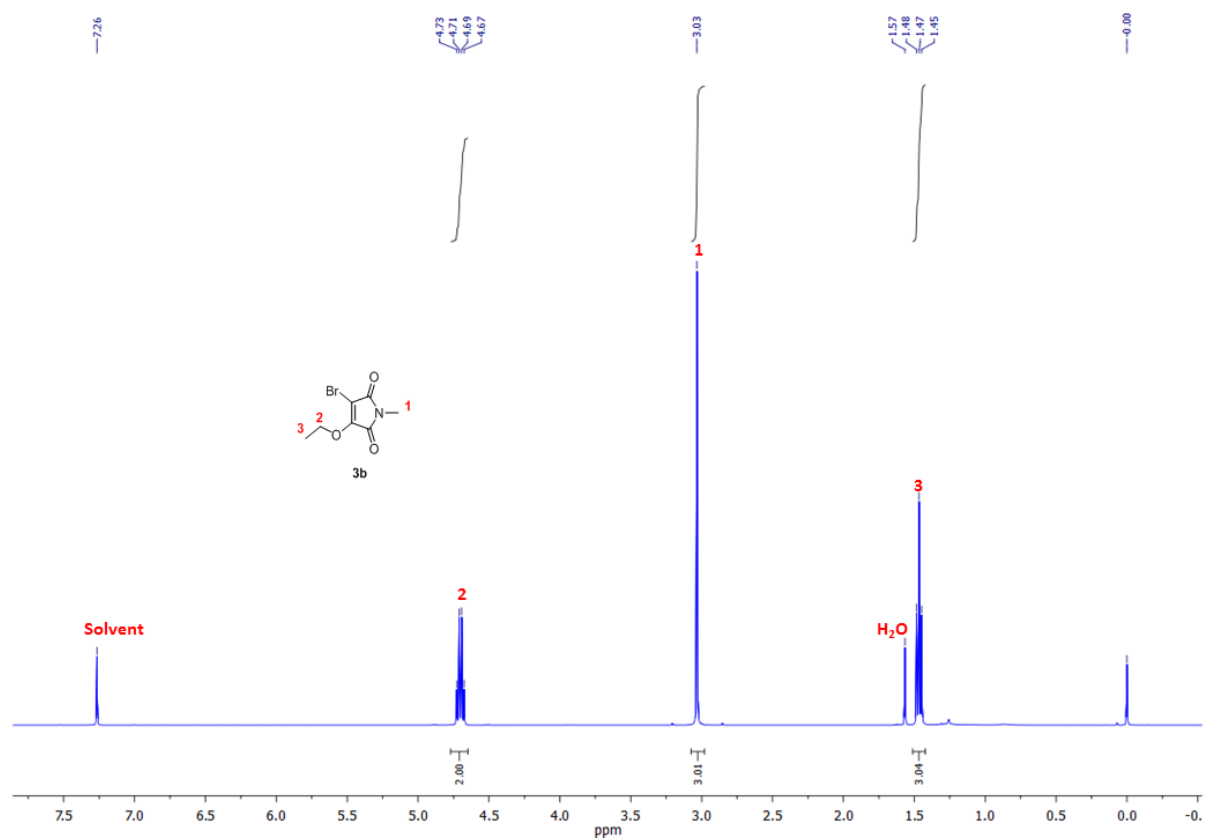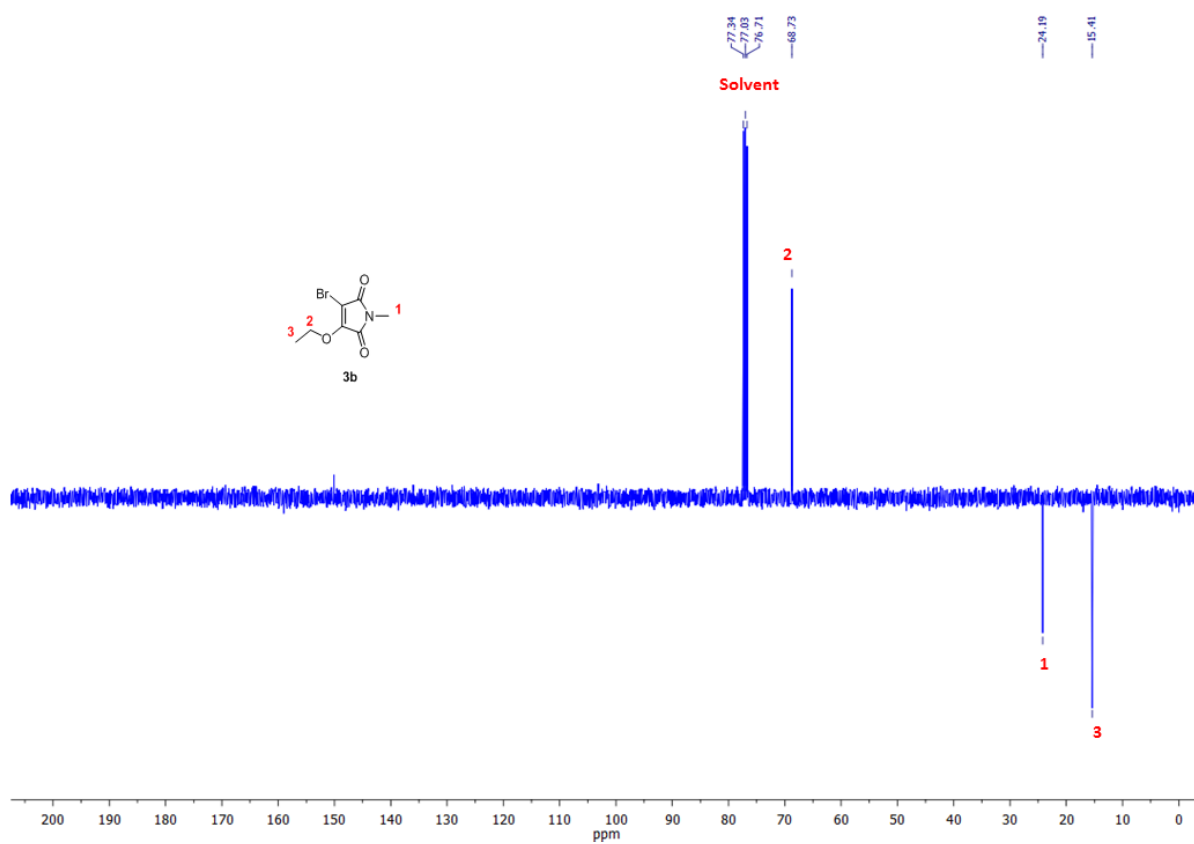

### 3-(benzyloxy)-4-chloro-1-methyl-1H-pyrrole-2,5-dione (3c):

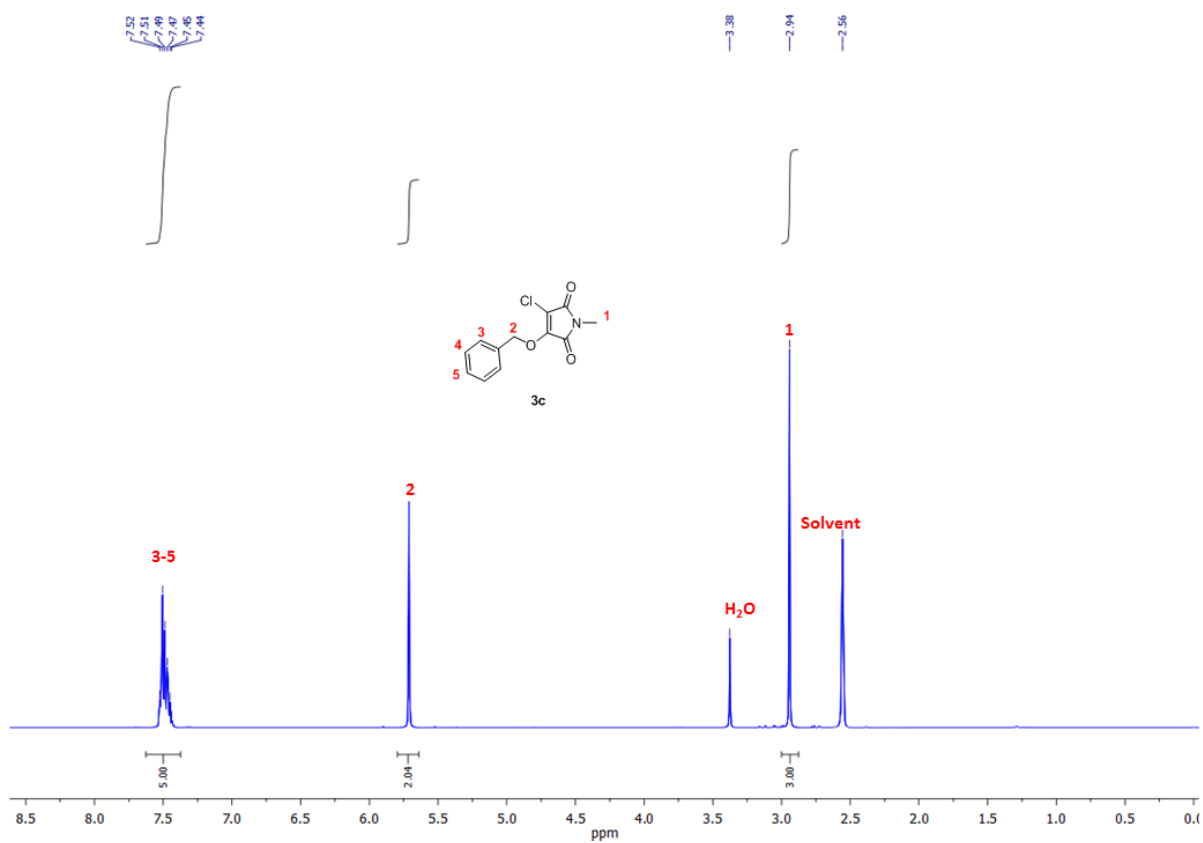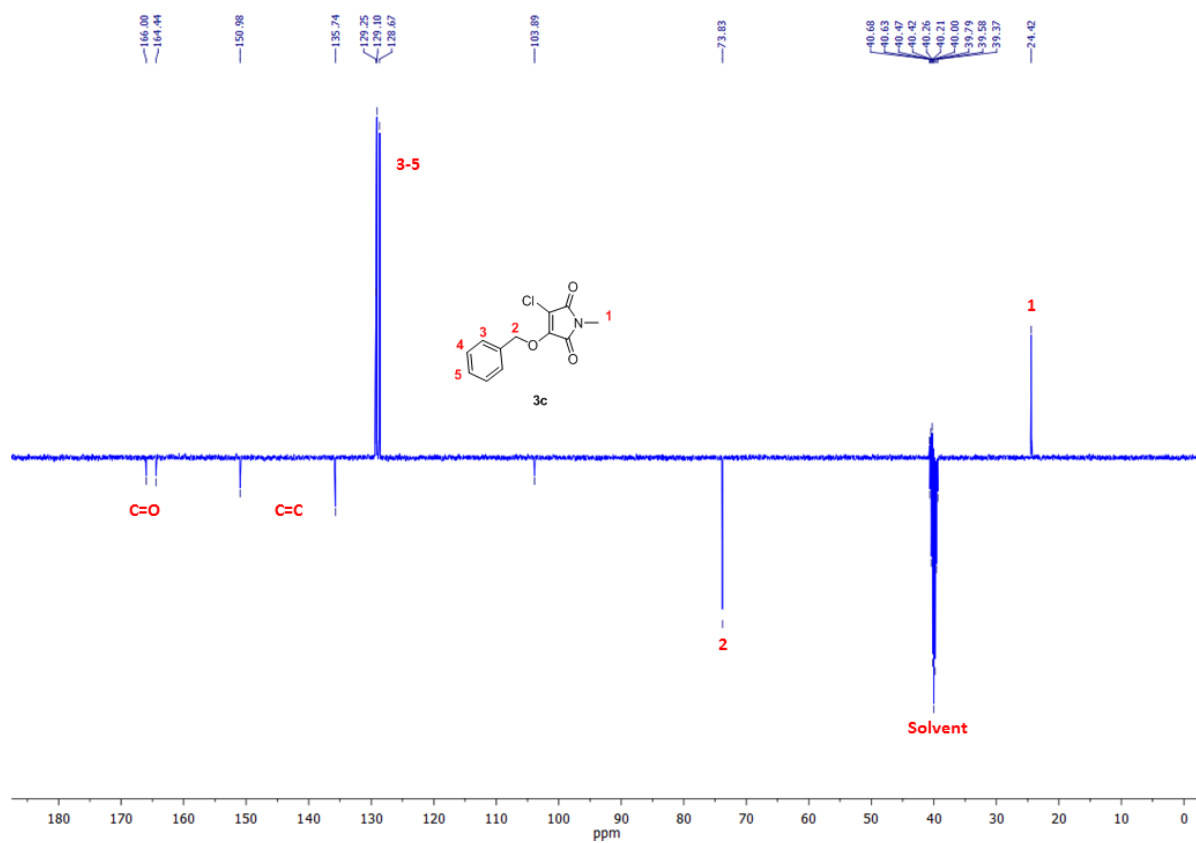

### 3-(benzyloxy)-4-bromo-1-methyl-1H-pyrrole-2,5-dione (3d)

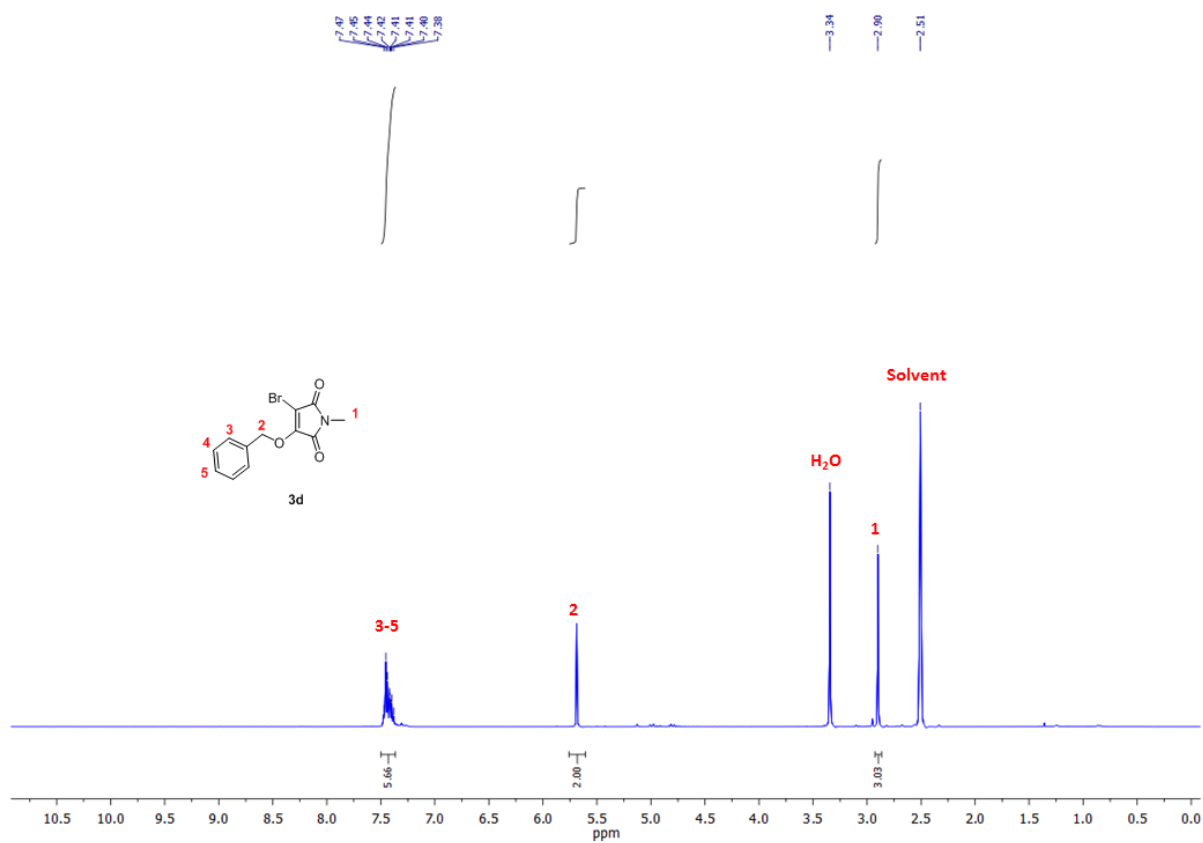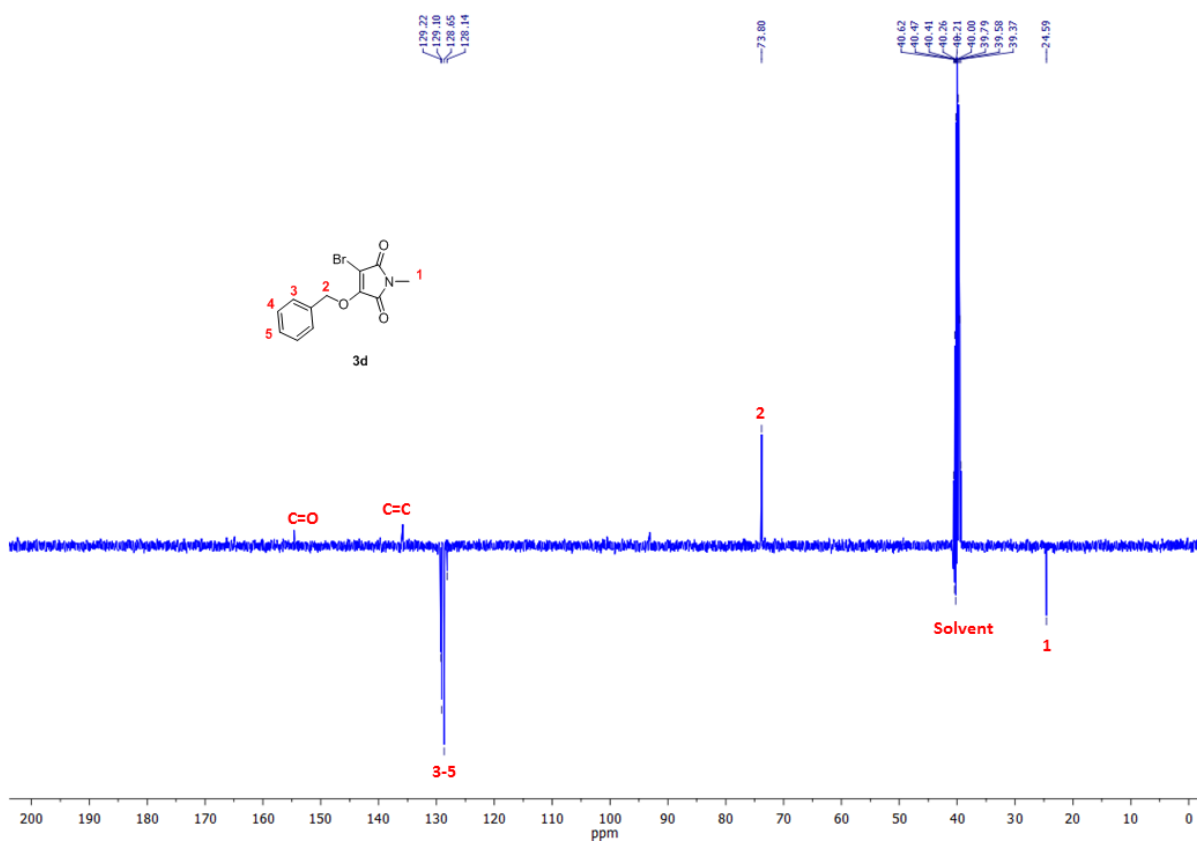

### 3-chloro-1-methyl-4-phenoxy-1H-pyrrole-2,5-dione (3e):

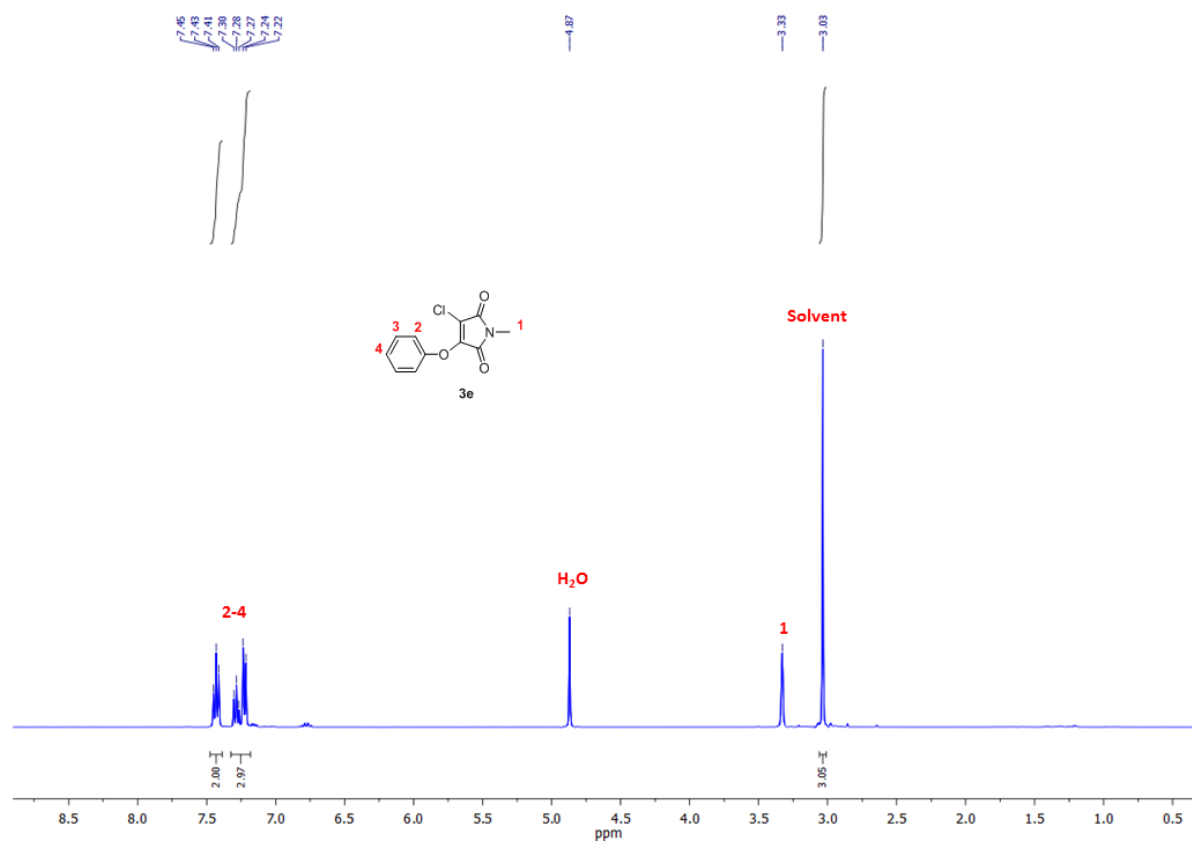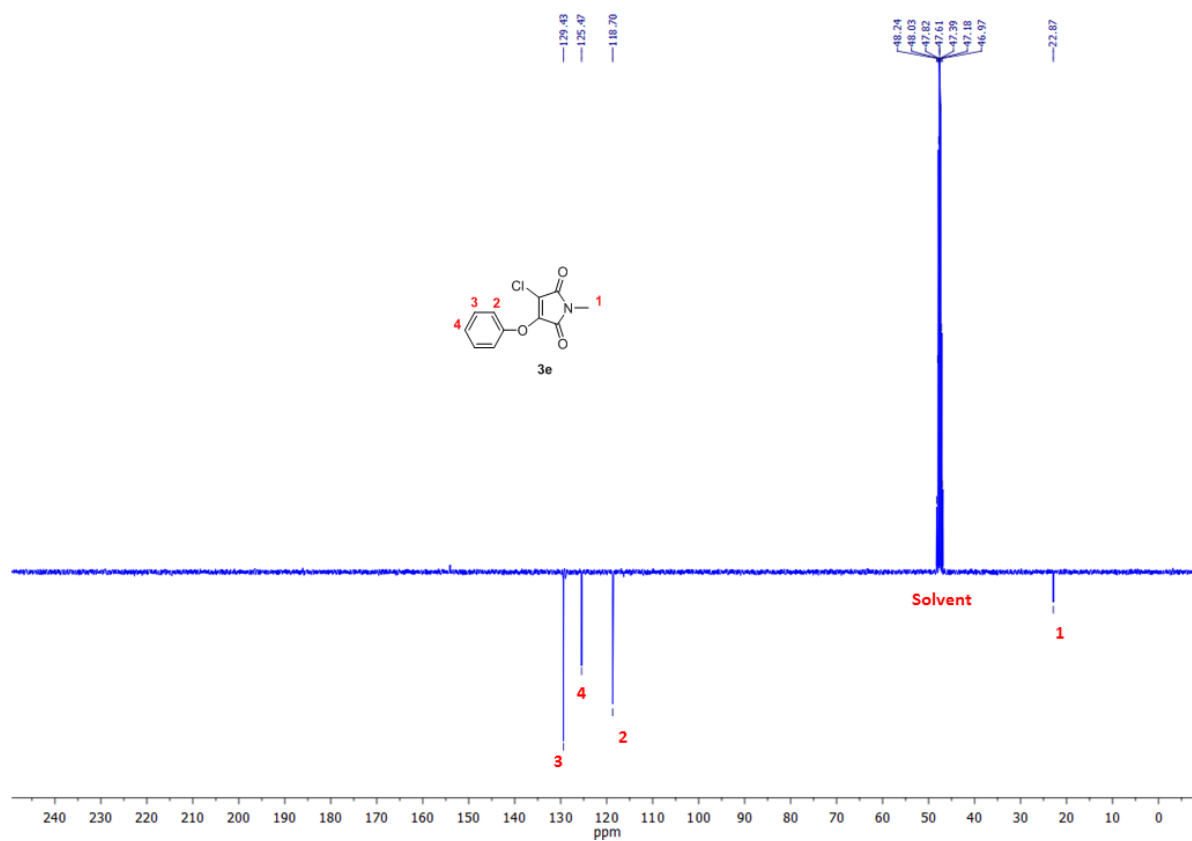



### 3-bromo-1-methyl-4-phenoxy-1H-pyrrole-2,5-dione (3f):

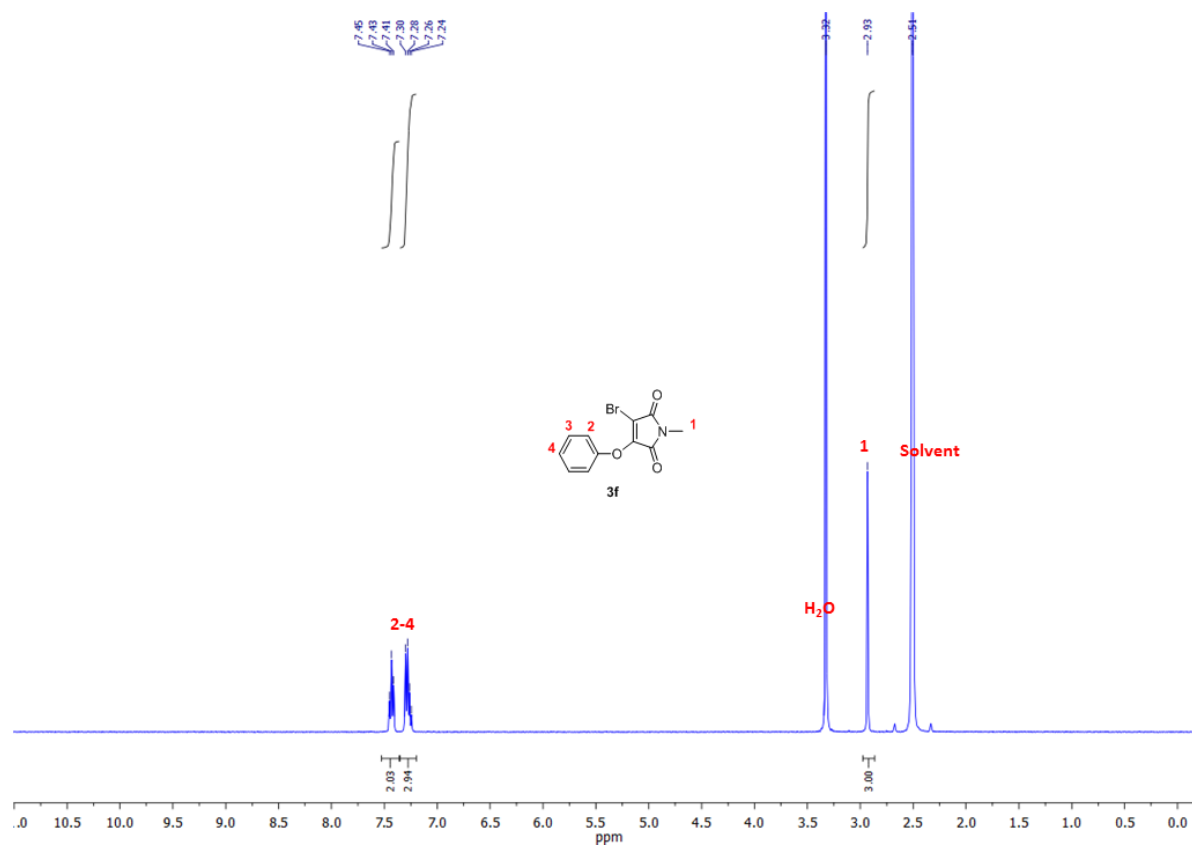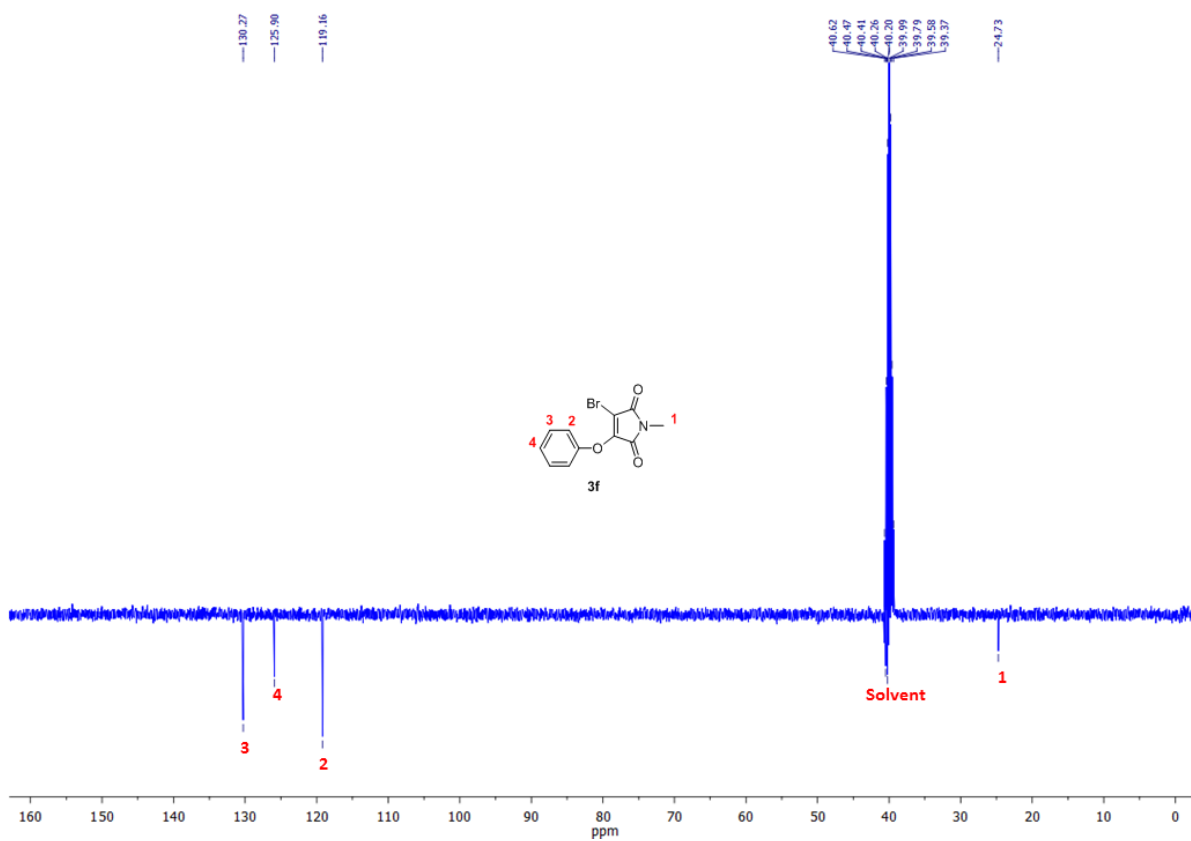

### 3-(butylthio)-4-(ethylamino)-1-methyl-1H-pyrrole-2,5-dione(4a)

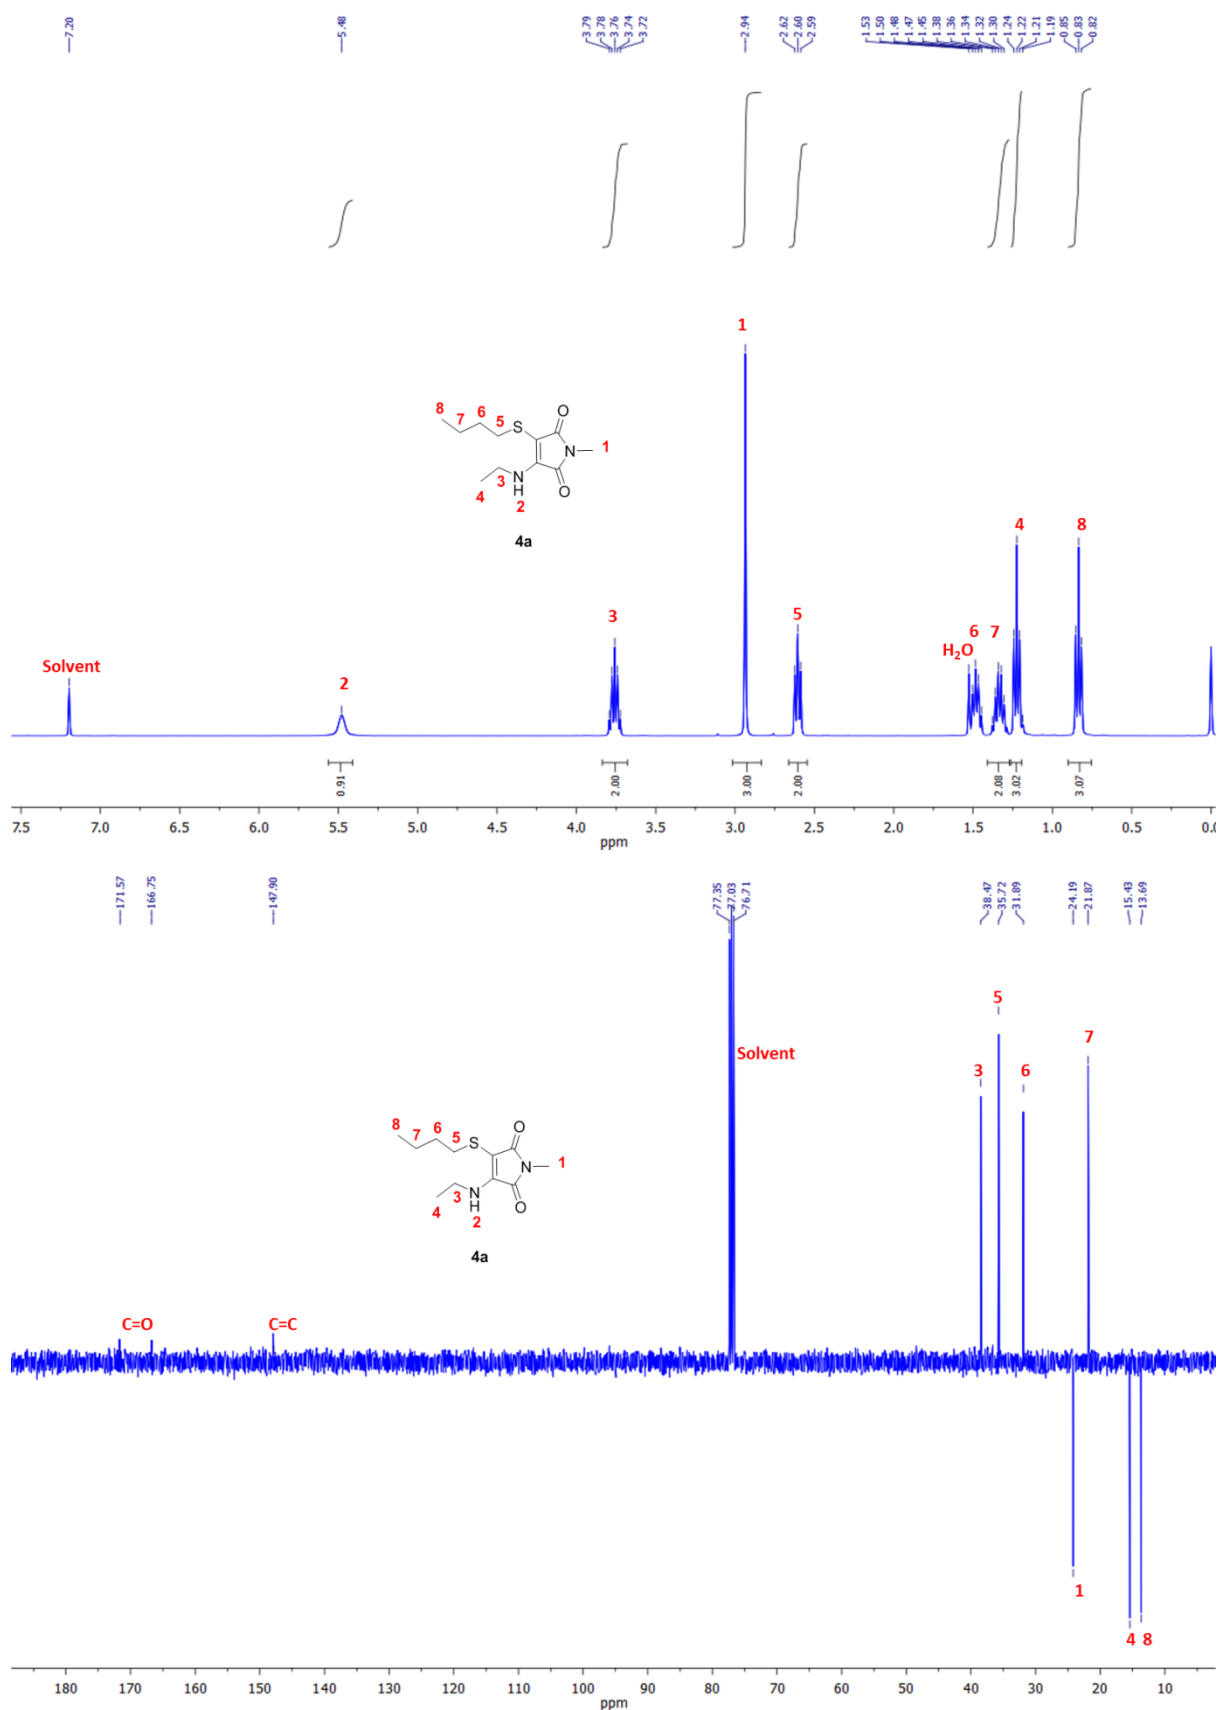

### 3-(ethylamino)-1-methyl-4-(octadecylthio)-1H-pyrrole-2,5-dione (4b)

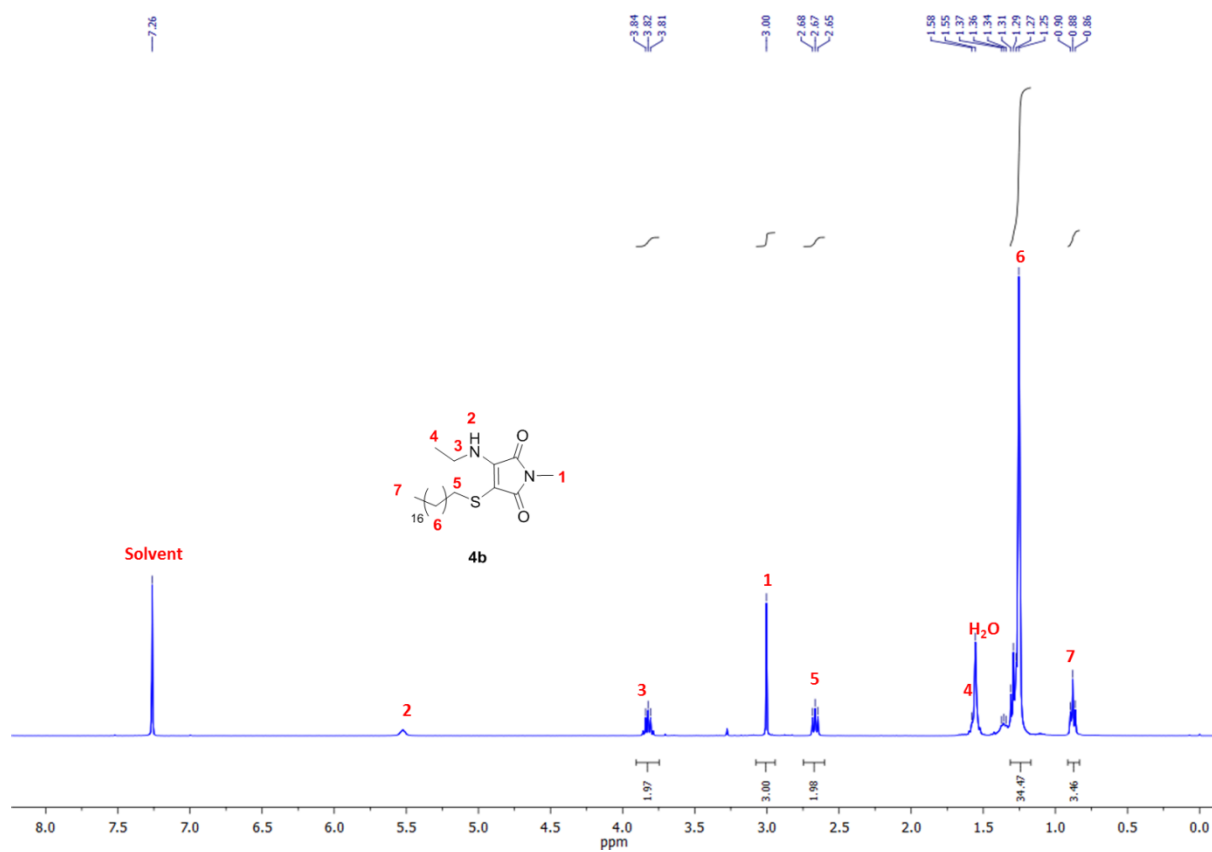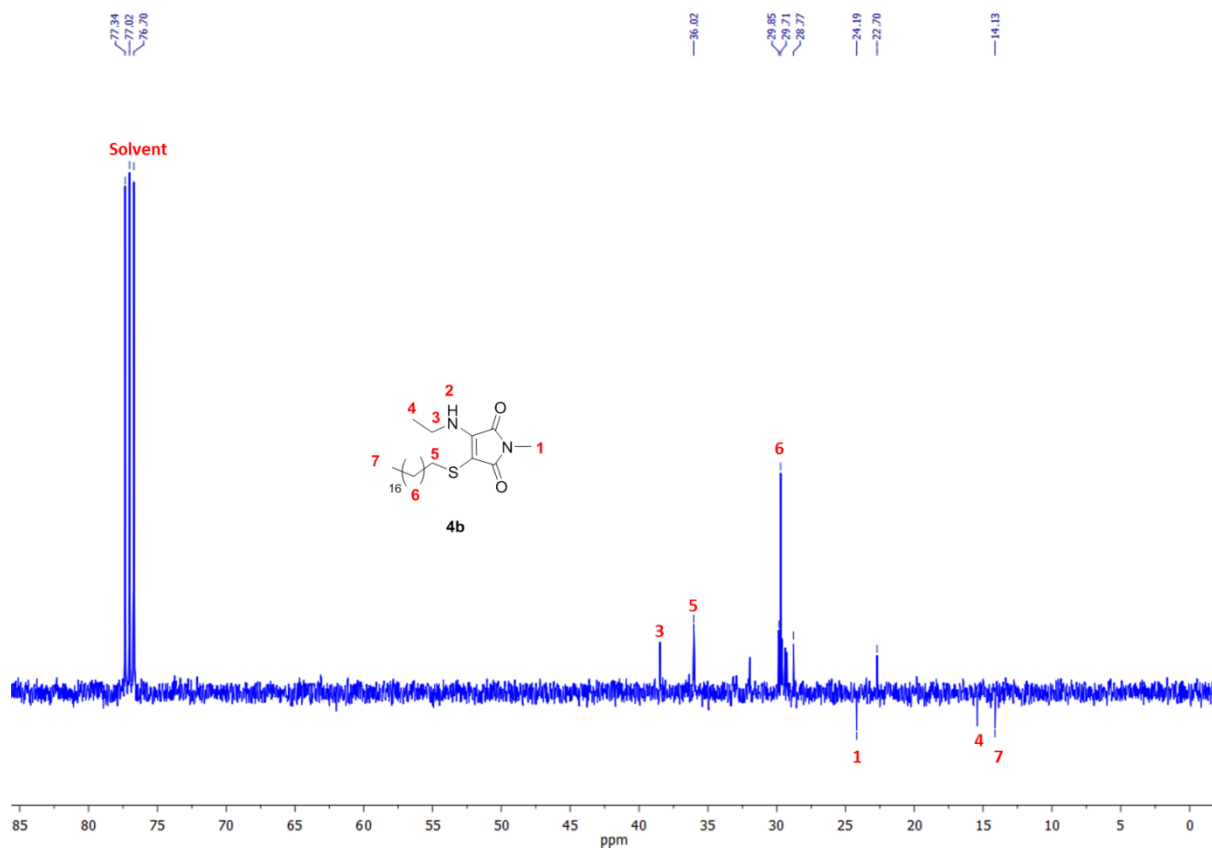

### 3-(ethylamino)-1-methyl-4-(phenylthio)-1H-pyrrole-2,5-dione(4c)

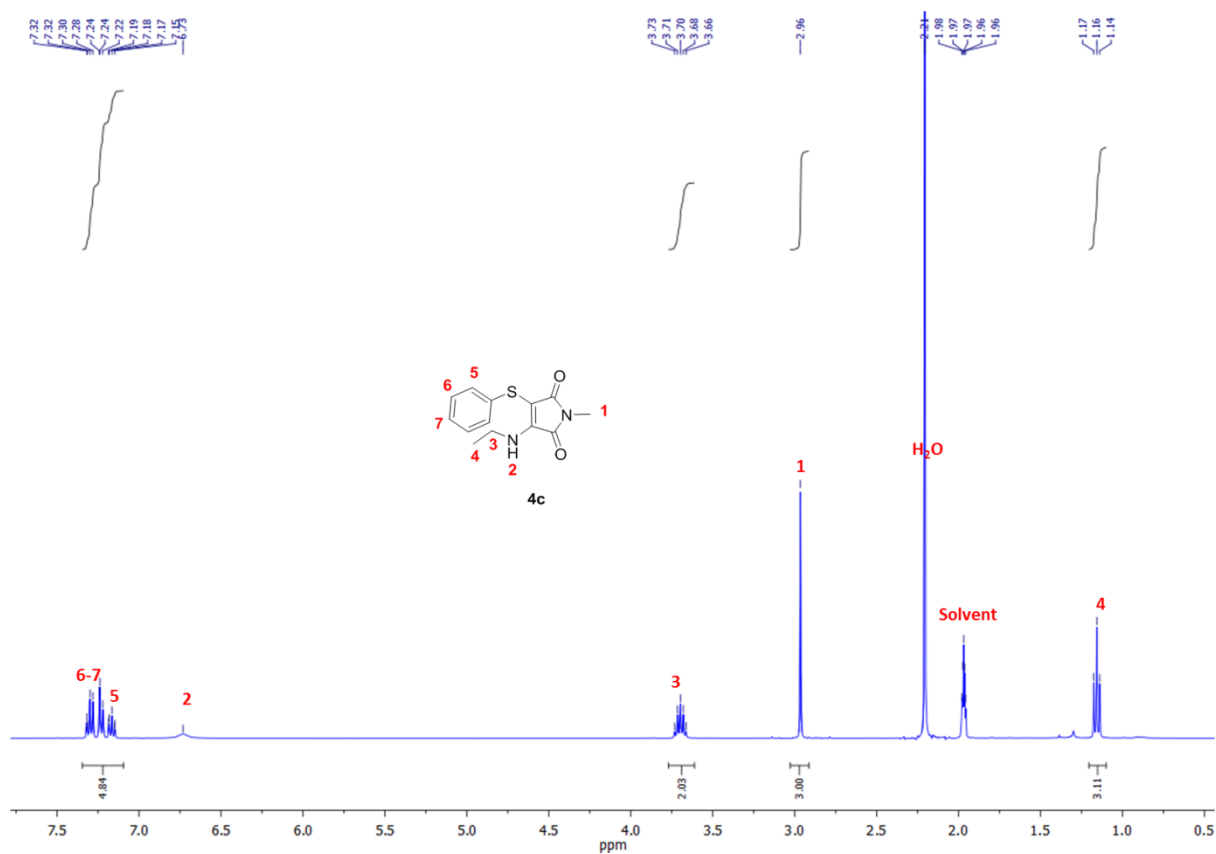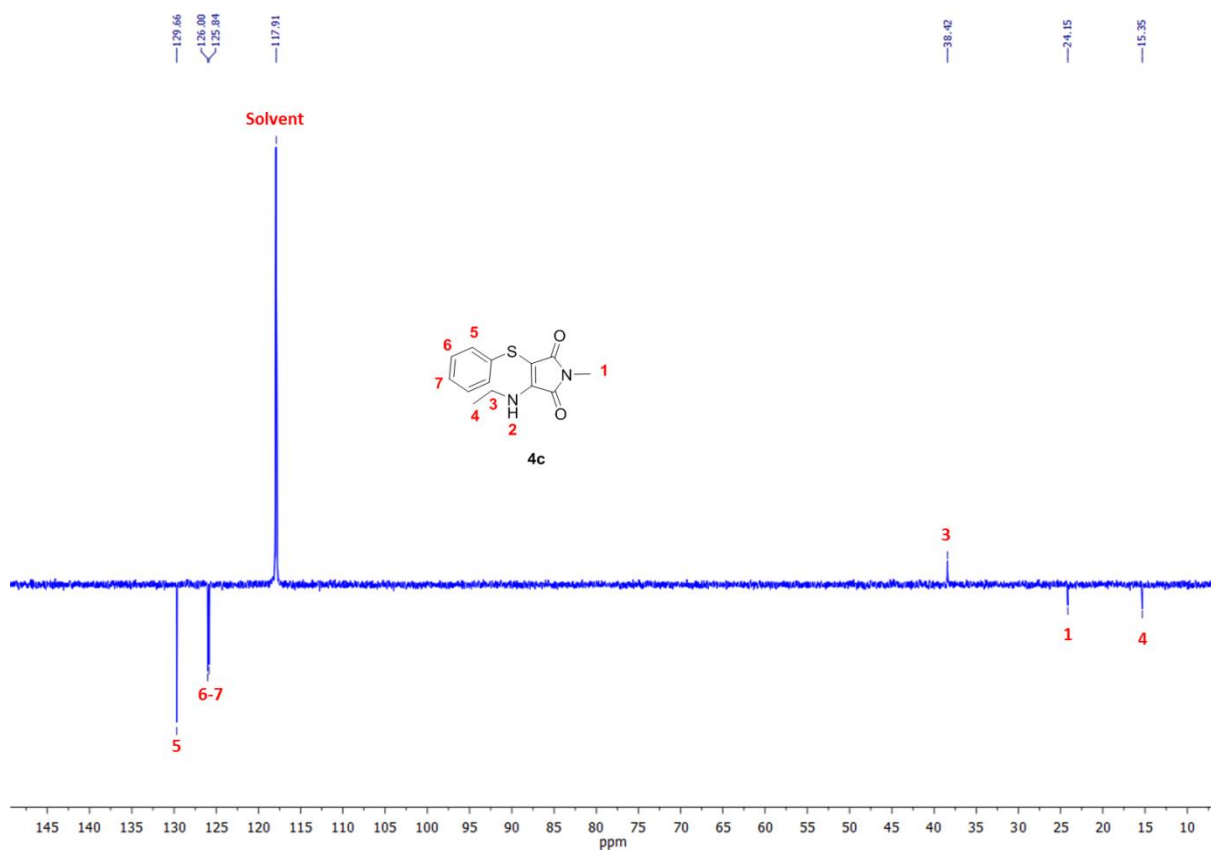

### 3-(ethylamino)-1-methyl-4-(o-tolylthio)-1H-pyrrole-2,5-dione(4d)

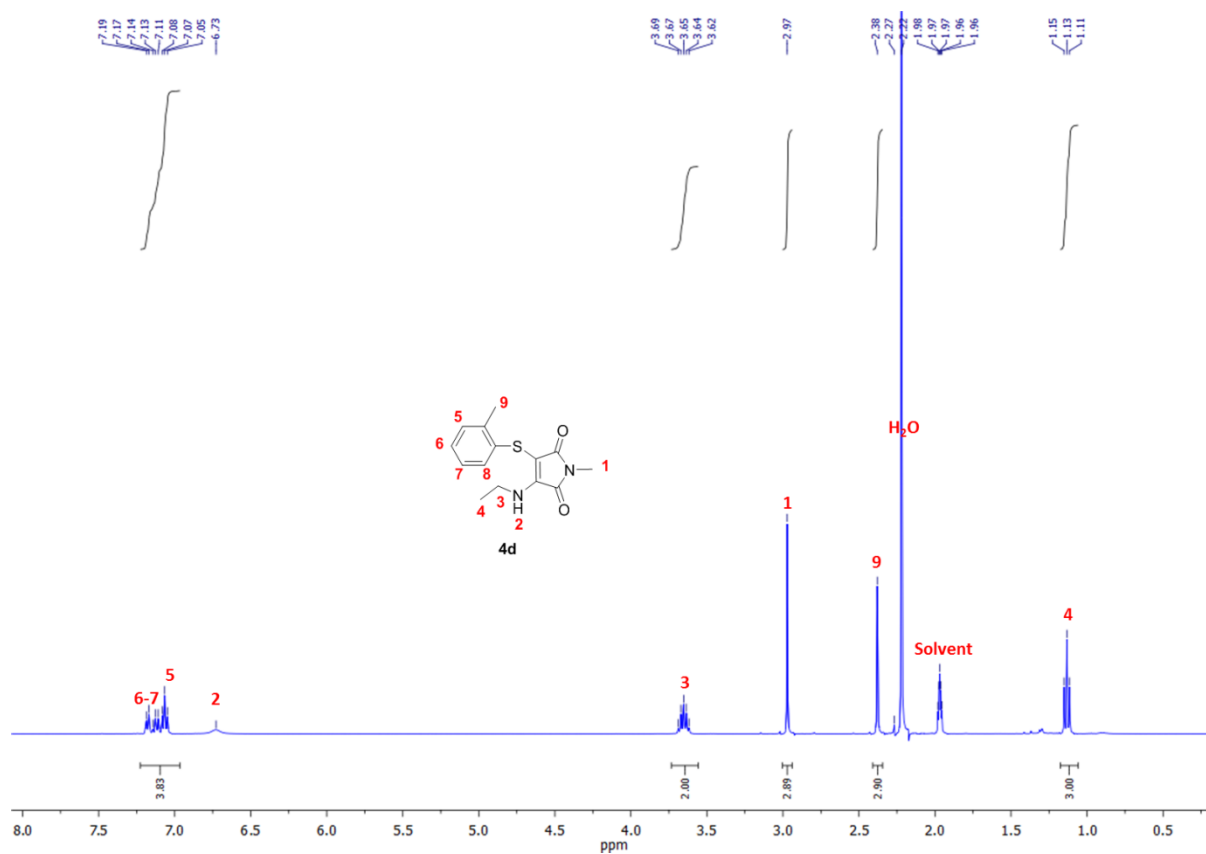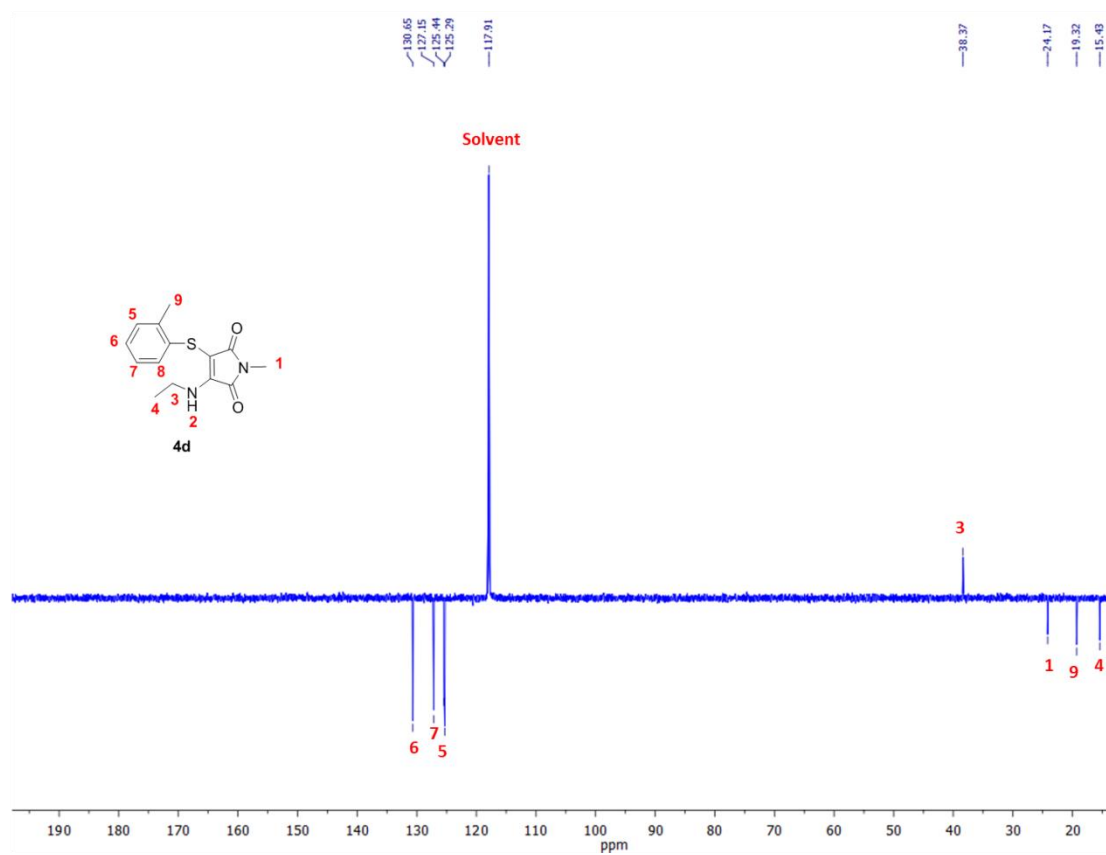

### 3-(benzylthio)-4-(ethylamino)-1-methyl-1H-pyrrole-2,5-dione (4e)

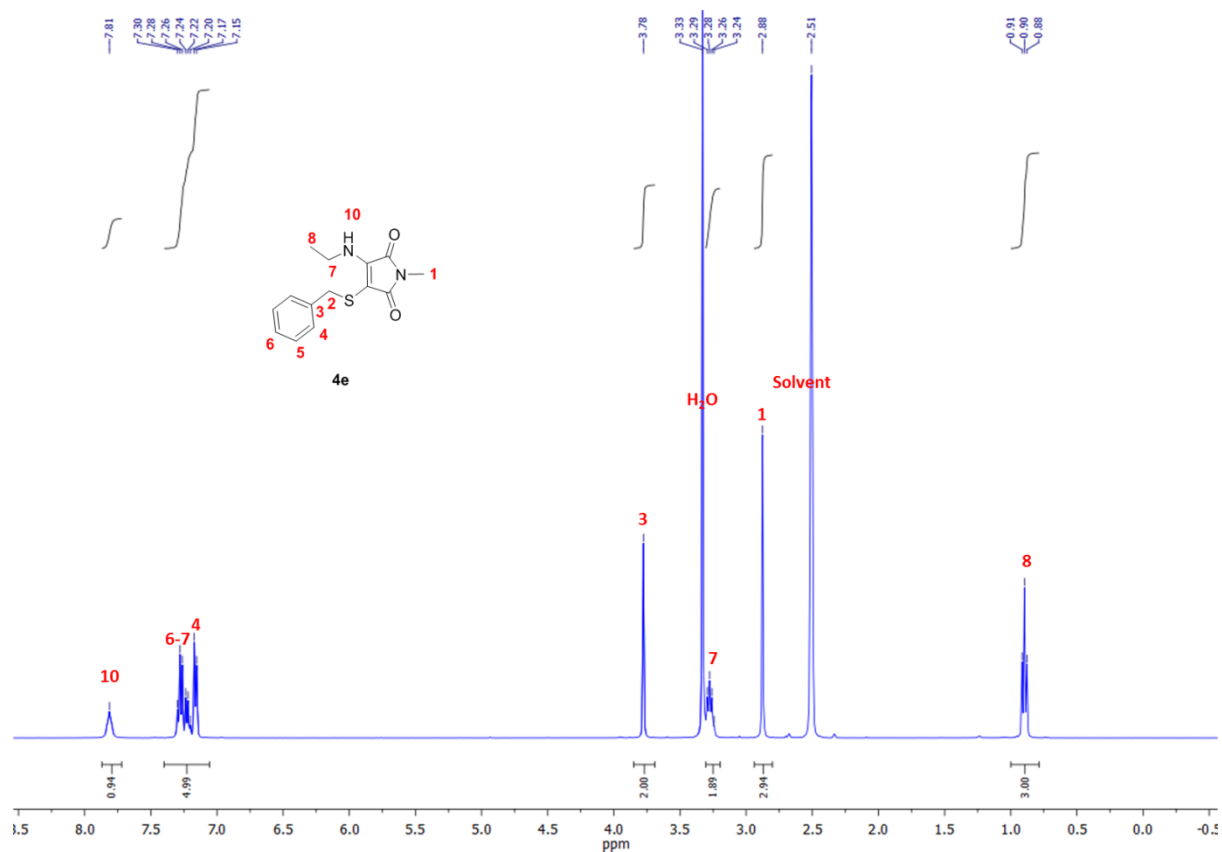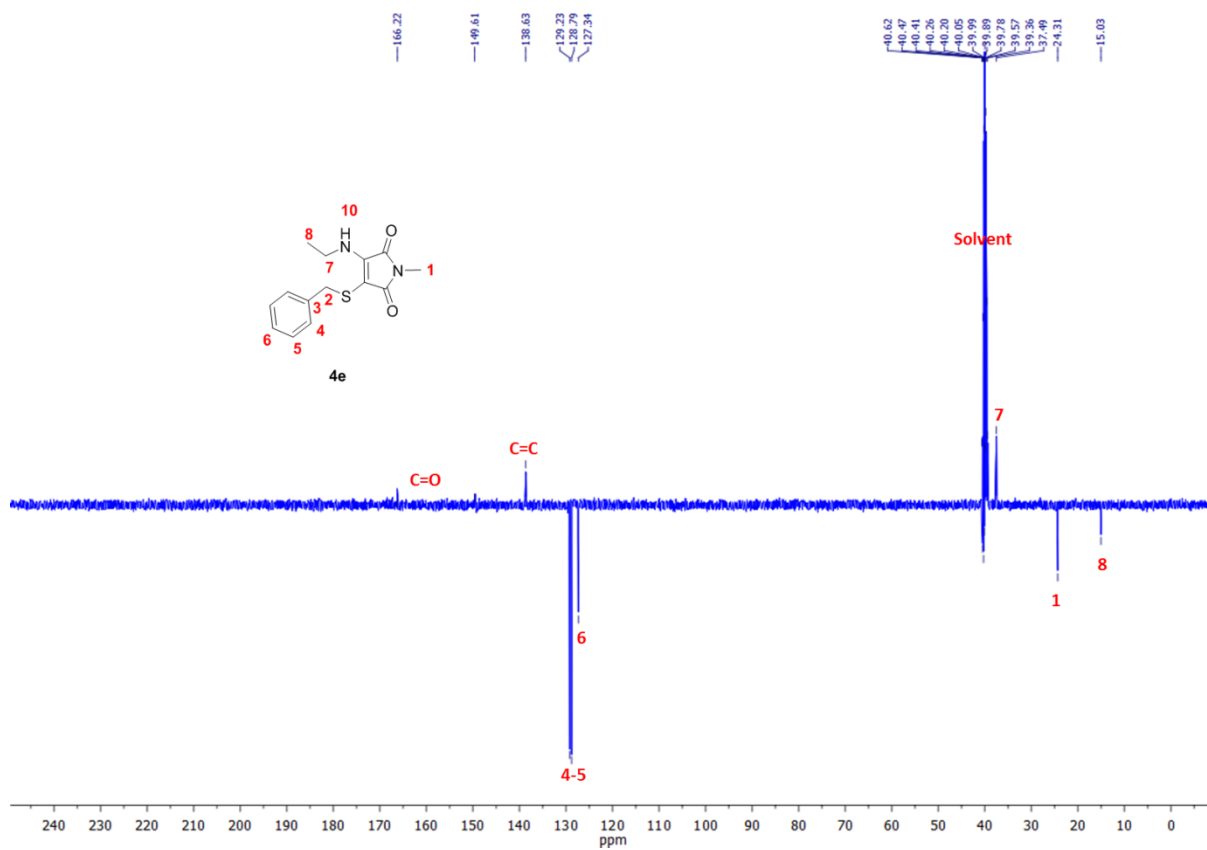

**3-(butylamino)-1-methyl-4-(phenylthio)-1H-pyrrole-2,5-dione (4f):**

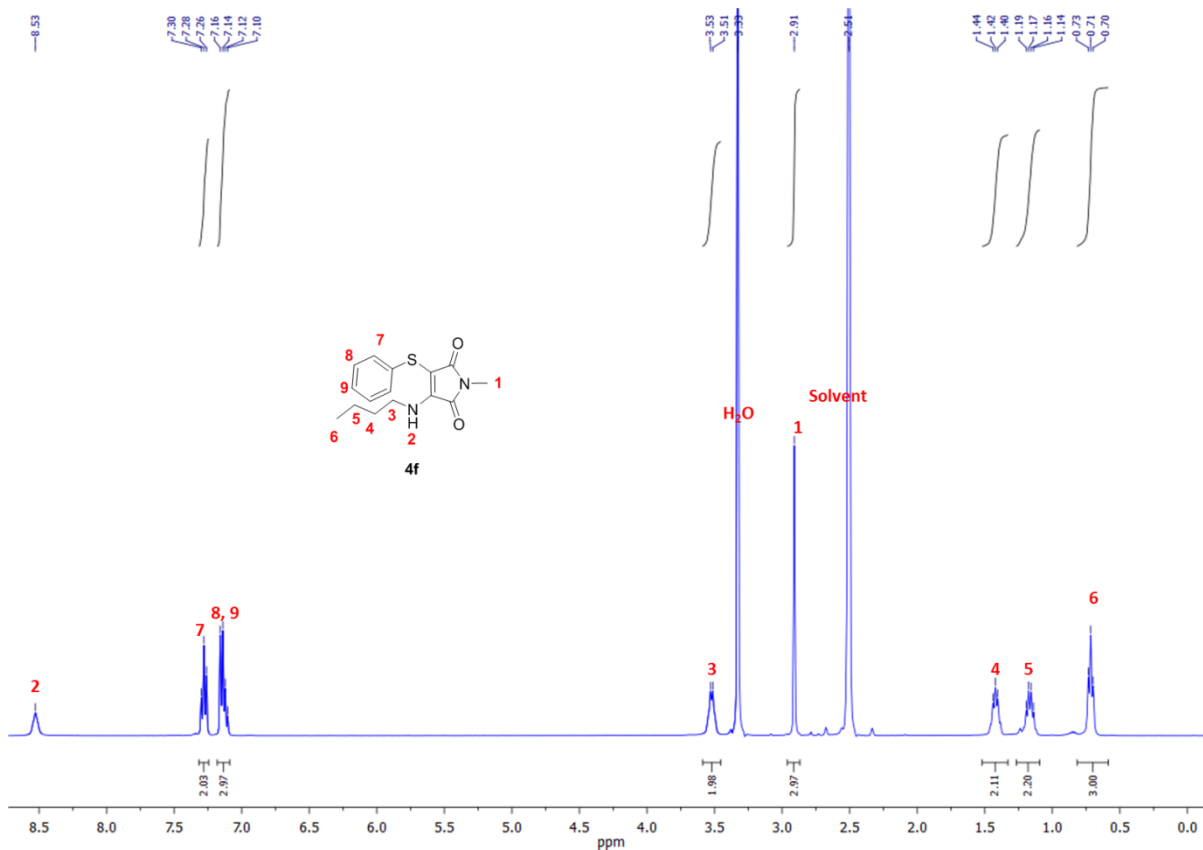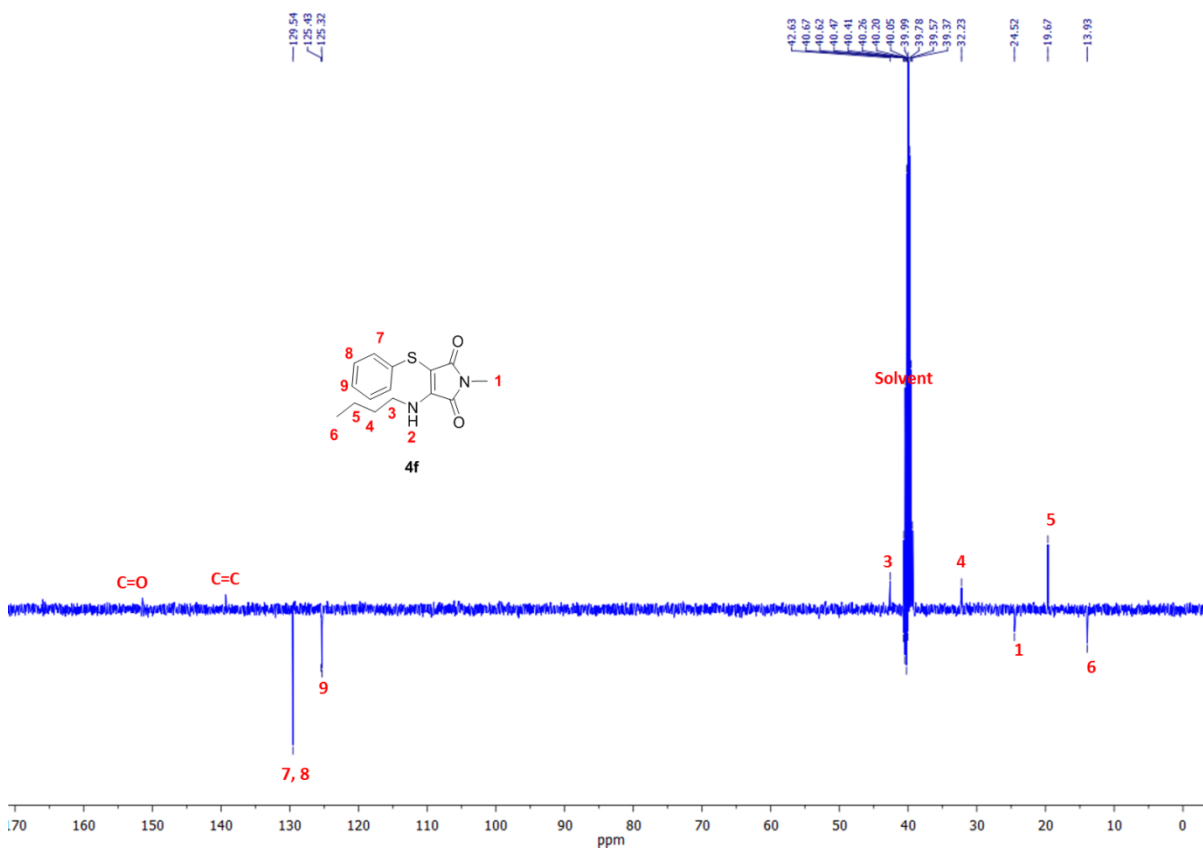

# 1-methyl-3-(phenylamino)-4-(phenylthio)-1H-pyrrole-2,5-dione (4g)

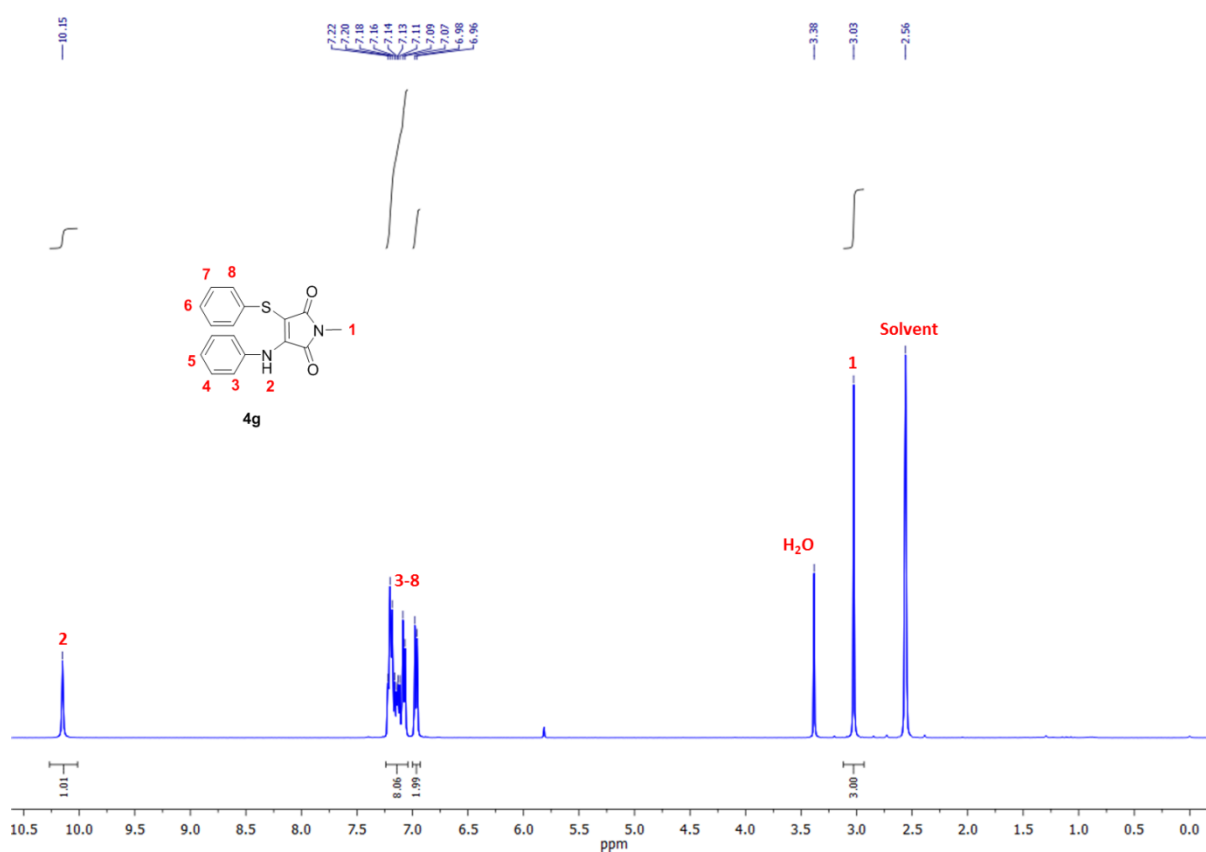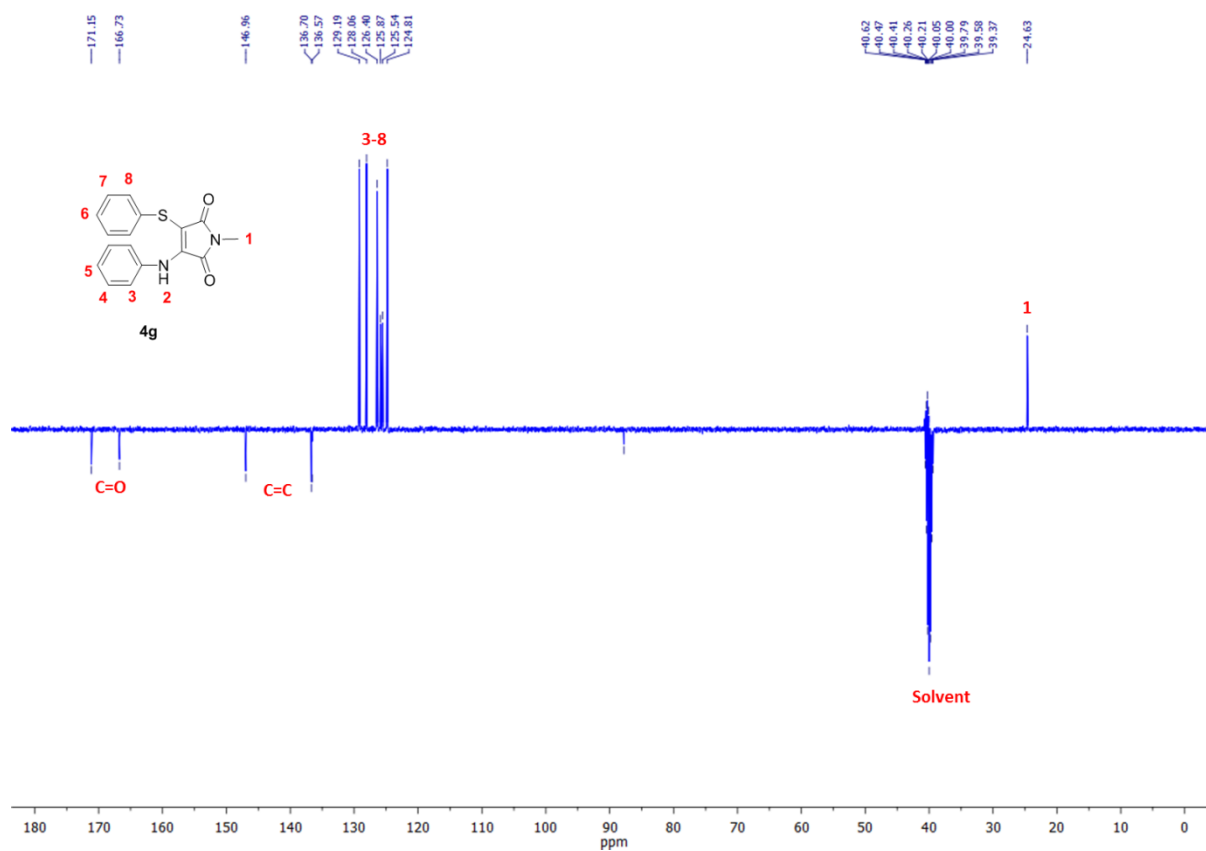



### 3-(butylamino)-4-(phenylthio)-1H-pyrrole-2,5-dione (4h)

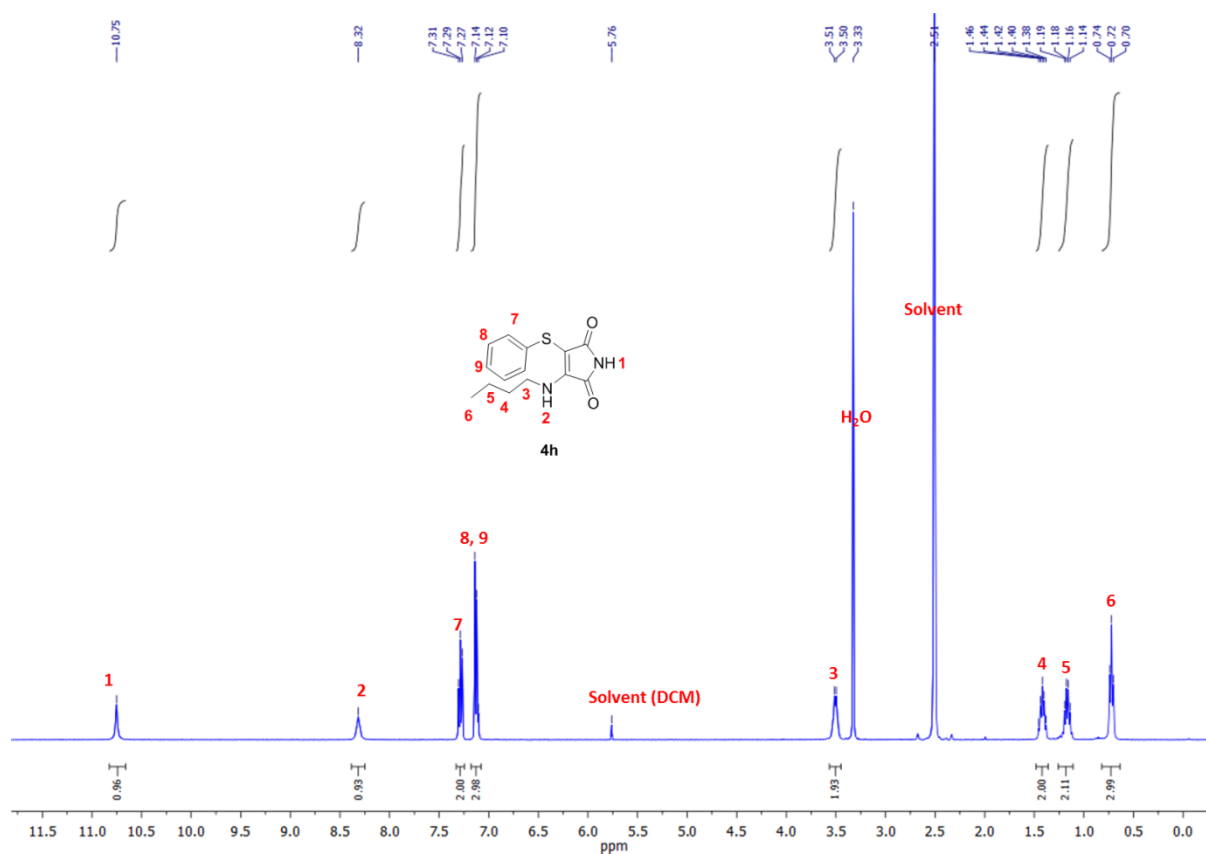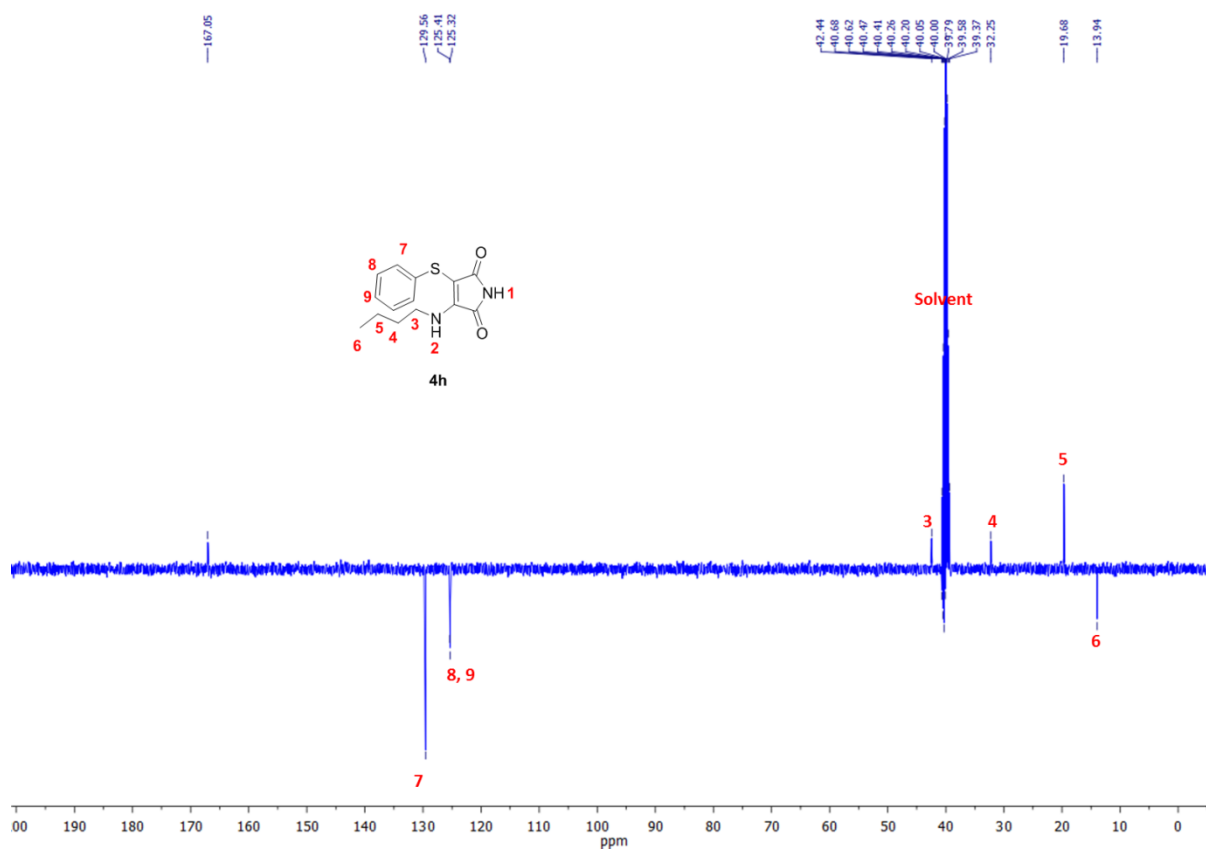

### 3-(butylthio)-4-(ethylamino)-1H-pyrrole-2,5-dione (4i)

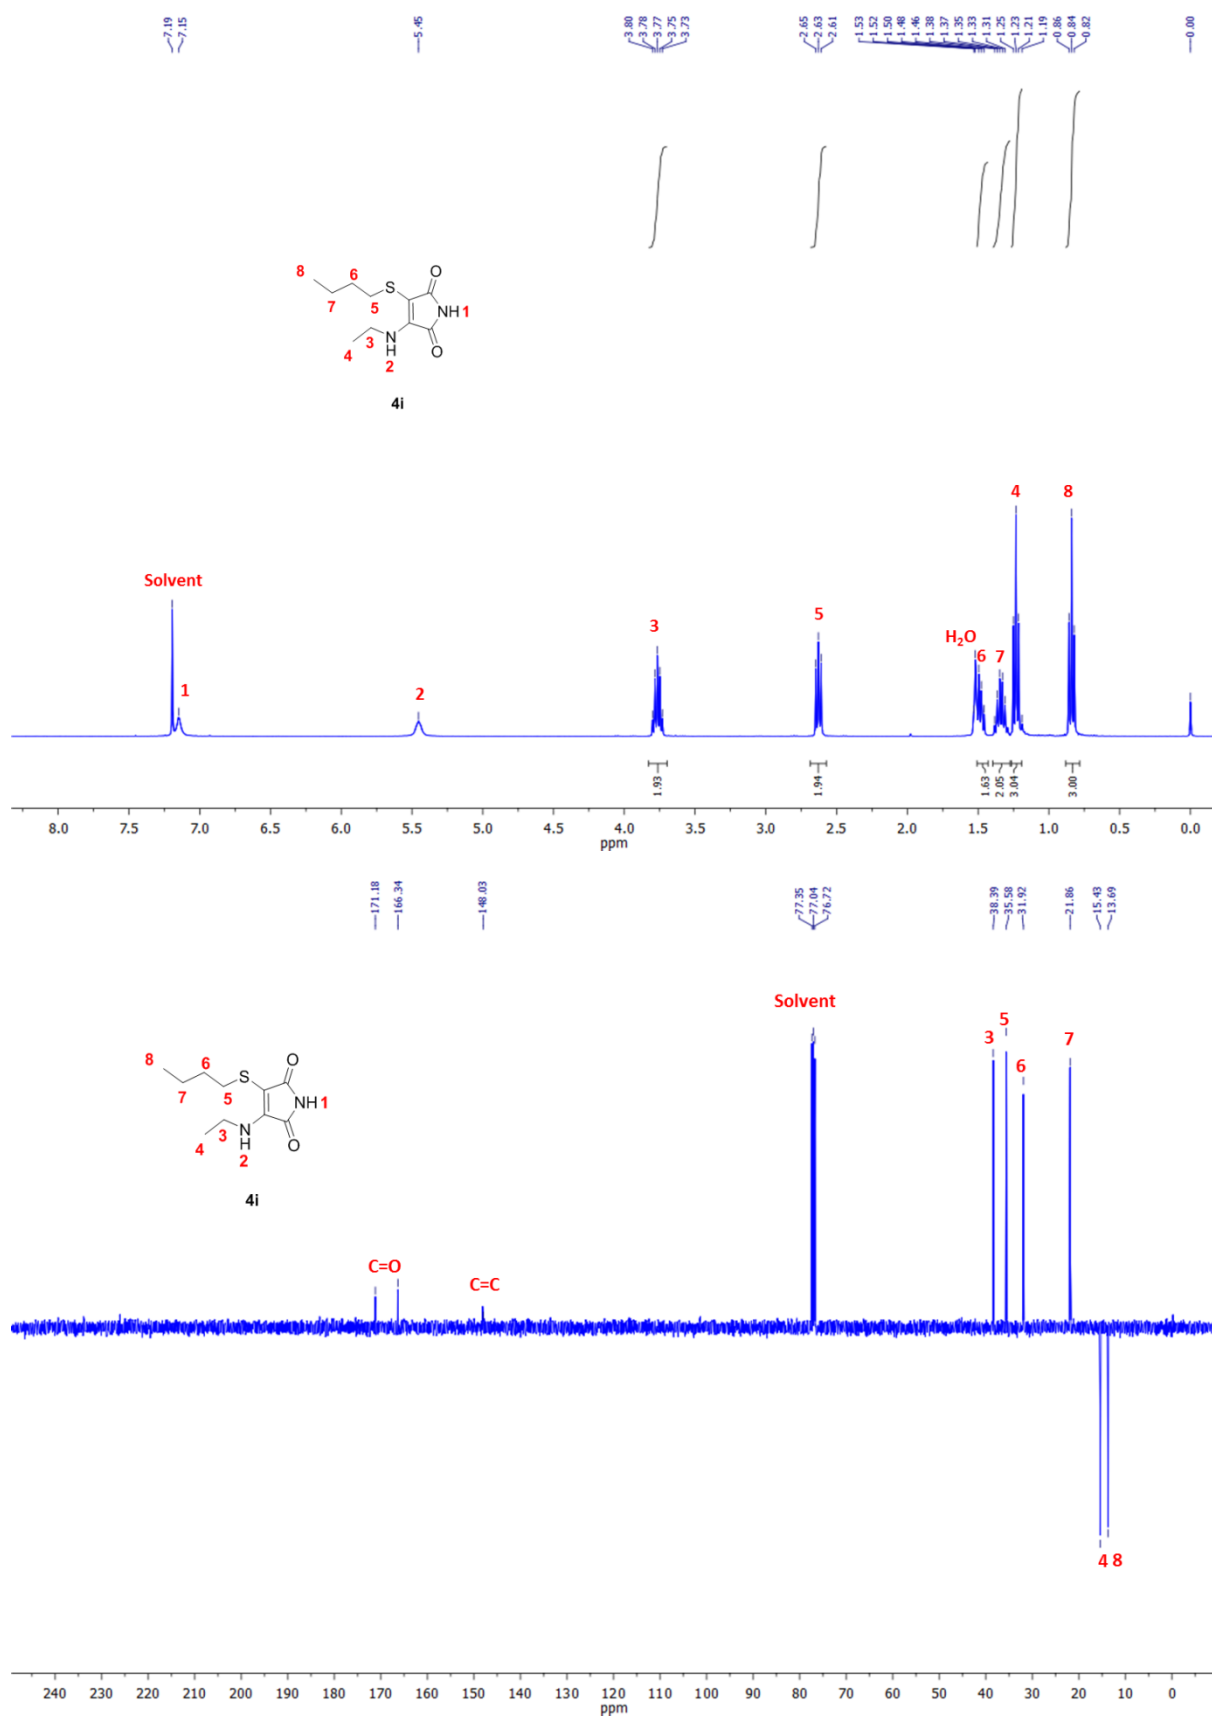

### 3-(benzylamino)-4-(butylthio)-1H-pyrrole-2,5-dione (4j)

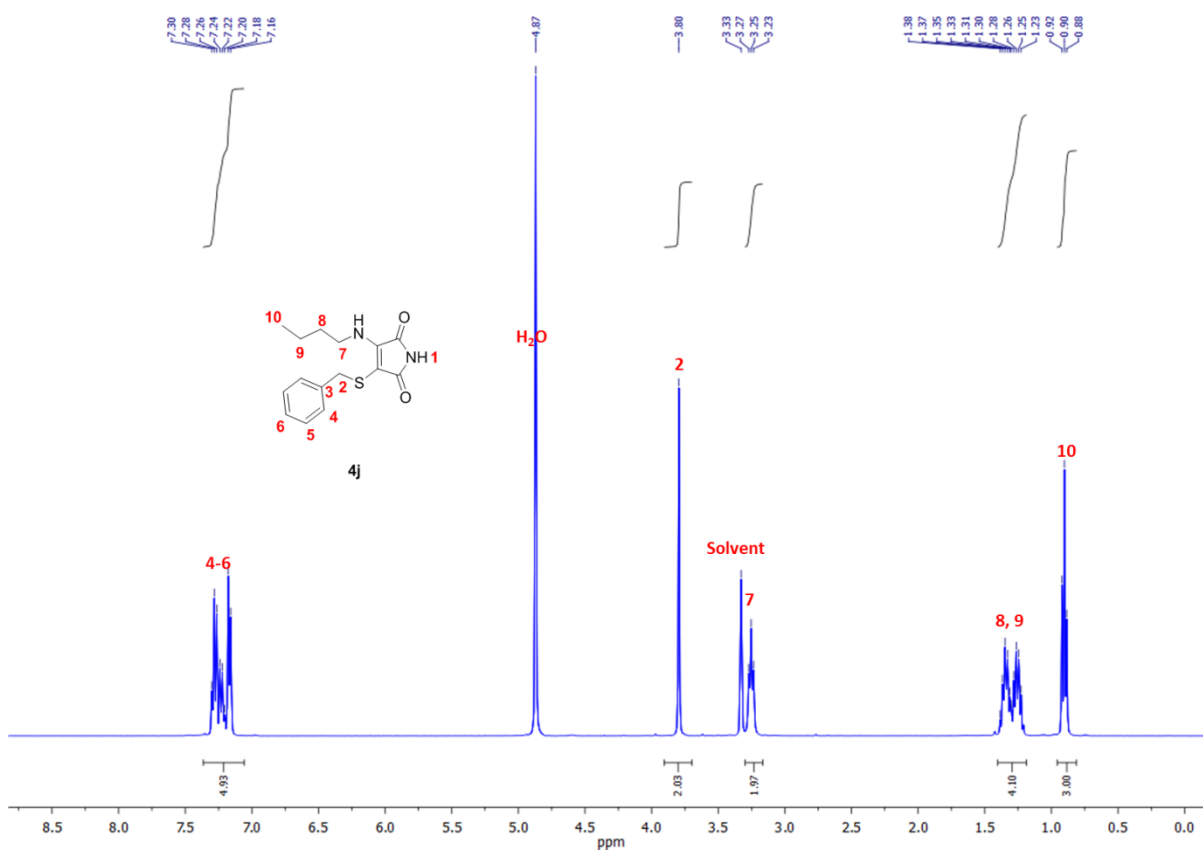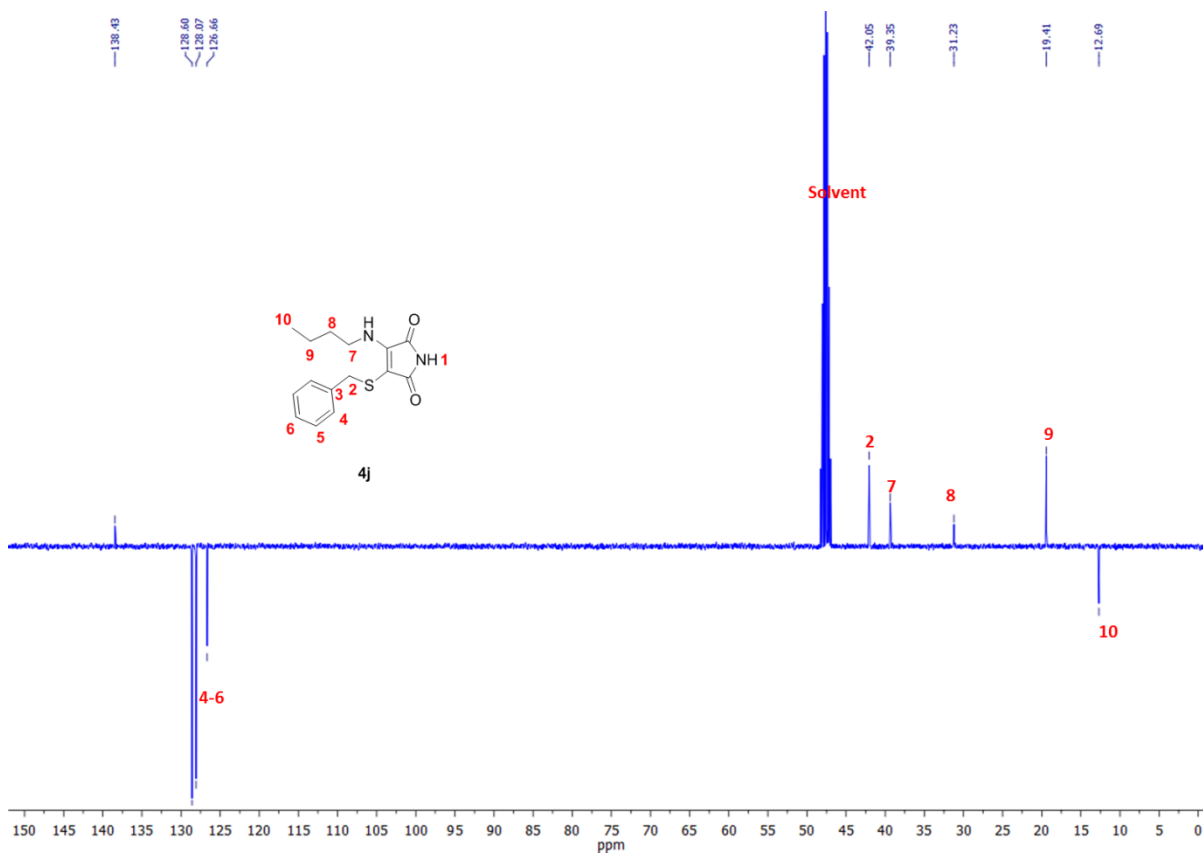

## 9. COMPUTATIONAL DETAILS

The geometries for all studied systems in the ground state have been fully optimized with the CAM-B3LYP<sup>7</sup> functional and the 6-311G(d,p) basis set.<sup>8,9</sup> The dispersion effects and the solvent were included in the optimization process. The D3-Grimme's dispersion<sup>10</sup> with Becke-Johnson damping factor<sup>11,12</sup> was used to evaluate the dispersion effects. The solvent was considered using the polarization continuum model (PCM)<sup>13, 14</sup> and the dielectric constant of diethyl ether ( $\epsilon = 4.24$ ). The harmonic vibrational frequencies were also calculated at the same level of theory in order to verify that all the stationary points are minima of their potential energy surface. The time-dependent density functional theory (TD-DFT)<sup>15-23</sup> was applied to compute the absorption and emission (fluorescence) spectra at the ground and the first singlet excited state, respectively. The charge distribution was obtained following the natural bond orbital (NBO) partition scheme by Weinhold and co-workers.<sup>24</sup> All the calculations were performed using the Gaussian09 program package.<sup>25</sup>

Table S2. TD-DFT excitation and emission energies and oscillator strengths of the maleimide derivatives studied in this work.<sup>a,b</sup>

| <b>Compound</b> | $\lambda_{\text{exc}}^{\text{c}}$ | $f_{\text{exc}}^{\text{d}}$ | $\lambda_{\text{em}}^{\text{e}}$ | $f_{\text{em}}^{\text{d}}$ | $\Delta\lambda^{\text{f}}$ |
|-----------------|-----------------------------------|-----------------------------|----------------------------------|----------------------------|----------------------------|
| <b>1a</b>       | 302.4                             | 0.023                       | 468.4                            | 0.011                      | 166.0                      |
| <b>1b</b>       | 309.2                             | 0.040                       | 465.6                            | 0.022                      | 156.4                      |
| <b>1c</b>       | 323.2                             | 0.078                       | 463.7                            | 0.058                      | 140.5                      |
| <b>2a</b>       | 338.6                             | 0.087                       | 460.2                            | 0.070                      | 121.6                      |
| <b>2b</b>       | 339.0                             | 0.087                       | 458.9                            | 0.073                      | 119.9                      |
| <b>2c</b>       | 339.9                             | 0.088                       | 458.5                            | 0.078                      | 118.6                      |
| <b>2d</b>       | 330.3                             | 0.121                       | 435.3                            | 0.104                      | 104.9                      |
| <b>2e</b>       | 331.3                             | 0.119                       | 435.4                            | 0.105                      | 104.2                      |
| <b>3a</b>       | 307.3                             | 0.035                       | 442.7                            | 0.028                      | 135.4                      |
| <b>3b</b>       | 309.0                             | 0.038                       | 442.1                            | 0.032                      | 133.1                      |
| <b>3c</b>       | 308.0                             | 0.031                       | 449.7                            | 0.022                      | 141.7                      |
| <b>3d</b>       | 310.2                             | 0.035                       | 449.8                            | 0.026                      | 139.5                      |
| <b>3e</b>       | 306.3                             | 0.033                       | 445.5                            | 0.024                      | 139.2                      |
| <b>3f</b>       | 308.9                             | 0.036                       | 459.8                            | 0.035                      | 151                        |
| <b>4a</b>       | 334.0                             | 0.090                       | 551.5                            | 0.084                      | 217.5                      |
| <b>4b</b>       | 333.8                             | 0.090                       | 552.9                            | 0.085                      | 219.0                      |
| <b>4c</b>       | 328.3                             | 0.067                       | 510.4                            | 0.065                      | 182.1                      |
| <b>4d</b>       | 328.1                             | 0.068                       | 511.5                            | 0.065                      | 183.4                      |
| <b>4e</b>       | 336.2                             | 0.095                       | 550.6                            | 0.089                      | 214.5                      |
| <b>4f</b>       | 336.8                             | 0.064                       | 510.0                            | 0.065                      | 173.2                      |
| <b>4g</b>       | 373.5                             | 0.088                       | 508.2                            | 0.098                      | 134.7                      |
| <b>4h</b>       | 316.7                             | 0.087                       | 491.4                            | 0.084                      | 174.8                      |
| <b>4i</b>       | 327.2                             | 0.115                       | 528.8                            | 0.106                      | 201.5                      |
| <b>4j</b>       | 326.3                             | 0.104                       | 537.6                            | 0.105                      | 211.3                      |

<sup>a</sup> All excitation and emission energies correspond to the first excited state ( $\pi \rightarrow \pi^*$  transition). <sup>b</sup> All values computed at CAM-B3LYP-D3BJ/6-311G(d,p) level of theory in solution using the PCM with  $\epsilon = 4.24$ . <sup>c</sup> Excitation wavelength, in nm. <sup>d</sup> Oscillator strength. <sup>e</sup> Emission wavelength, in nm. <sup>f</sup> Stokes shift ( $\lambda_{\text{em}} - \lambda_{\text{exc}}$ ).

Table S3. Natural population analysis of the Carbon atoms adjacent to the electron withdrawing and donating groups (labeled as C<sub>2</sub> and C<sub>3</sub>, respectively).<sup>a</sup>

| <b>Compound</b> | <b>q<sub>C2</sub></b> | <b>q<sub>C3</sub></b> | <b>Δq</b> |
|-----------------|-----------------------|-----------------------|-----------|
| <b>1a</b>       | -0.13                 | -0.13                 | 0.00      |
| <b>1b</b>       | -0.20                 | -0.20                 | 0.00      |
| <b>1c</b>       | -0.32                 | -0.32                 | 0.00      |
| <b>2a</b>       | -0.24                 | 0.15                  | 0.39      |
| <b>2b</b>       | -0.32                 | 0.15                  | 0.47      |
| <b>2c</b>       | -0.44                 | 0.15                  | 0.59      |
| <b>2d</b>       | -0.25                 | 0.14                  | 0.39      |
| <b>2e</b>       | -0.32                 | 0.14                  | 0.47      |
| <b>3a</b>       | -0.23                 | 0.29                  | 0.52      |
| <b>3b</b>       | -0.31                 | 0.29                  | 0.6       |
| <b>3c</b>       | -0.22                 | 0.28                  | 0.50      |
| <b>3d</b>       | -0.29                 | 0.28                  | 0.57      |
| <b>3e</b>       | -0.21                 | 0.28                  | 0.49      |
| <b>3f</b>       | -0.29                 | 0.28                  | 0.57      |
| <b>4a</b>       | -0.40                 | 0.18                  | 0.58      |
| <b>4b</b>       | -0.40                 | 0.18                  | 0.58      |
| <b>4c</b>       | -0.42                 | 0.19                  | 0.61      |
| <b>4d</b>       | -0.42                 | 0.19                  | 0.61      |
| <b>4e</b>       | -0.40                 | 0.18                  | 0.59      |
| <b>4f</b>       | -0.42                 | 0.19                  | 0.61      |
| <b>4g</b>       | -0.38                 | 0.16                  | 0.53      |
| <b>4h</b>       | -0.42                 | 0.19                  | 0.61      |
| <b>4i</b>       | -0.40                 | 0.17                  | 0.57      |
| <b>4j</b>       | -0.42                 | 0.19                  | 0.60      |

<sup>a</sup> All values computed at CAM-B3LYP-D3BJ/6-311G(d,p) level of theory in solution using the PCM with  $\epsilon = 4.24$ .

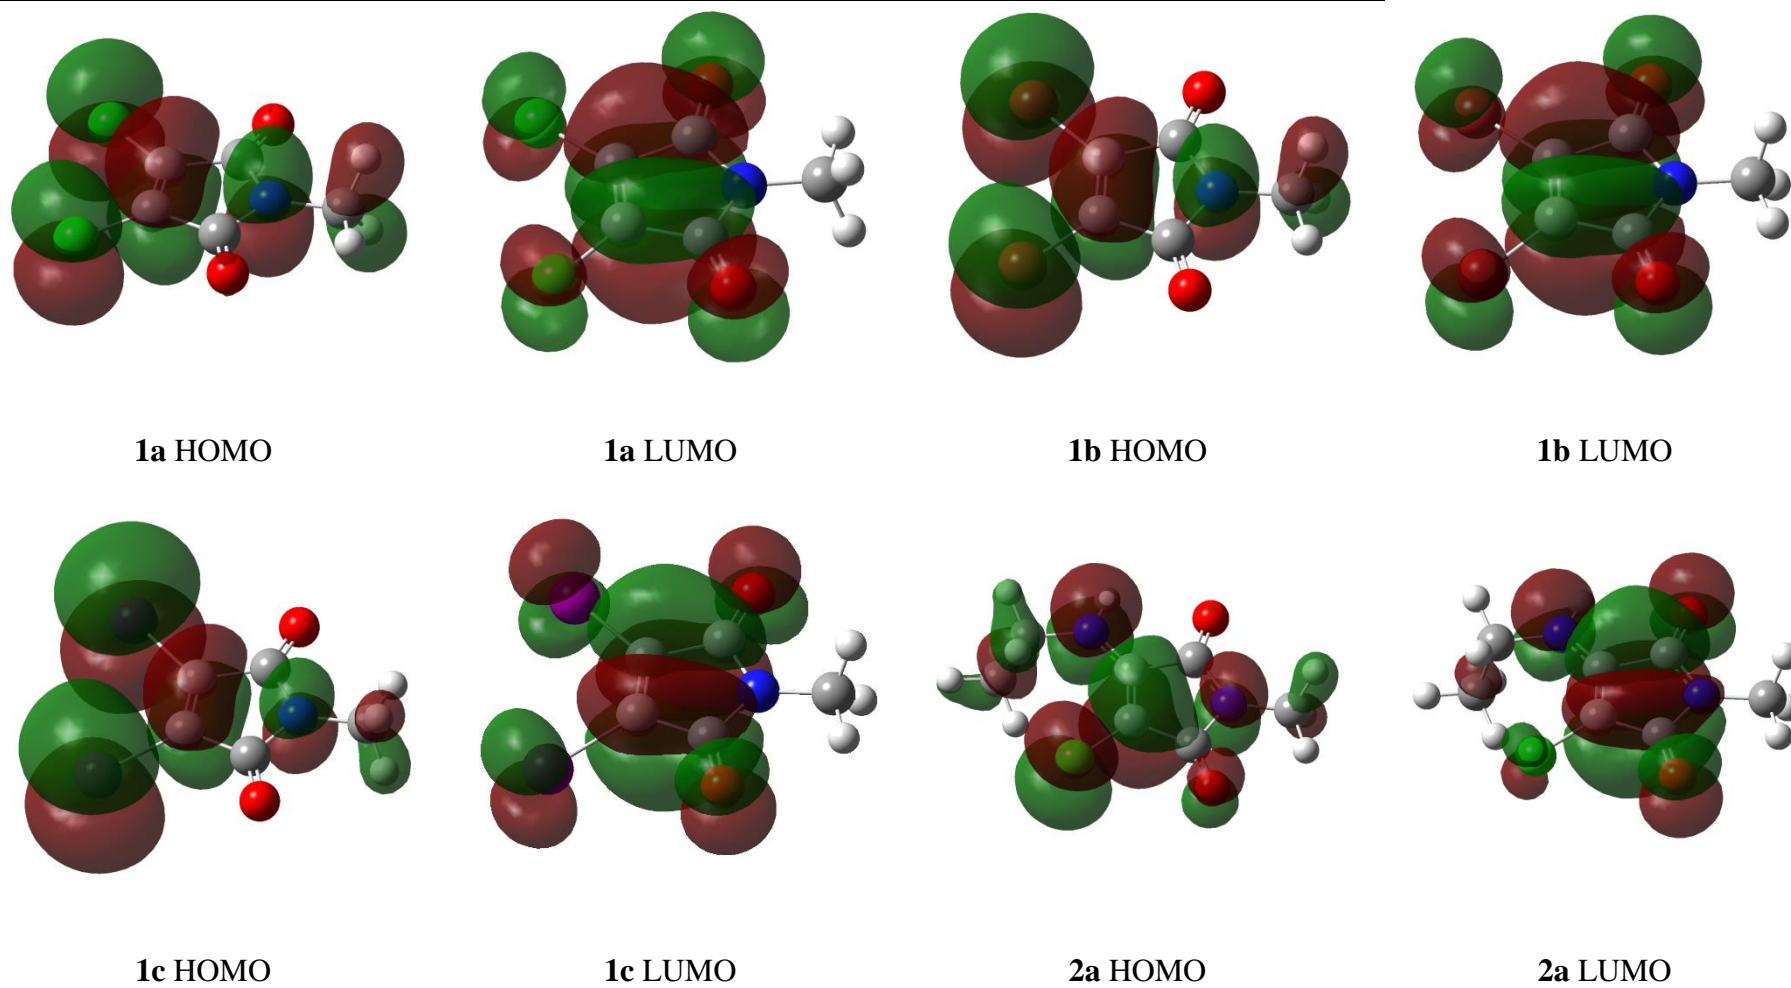

Figure S17. HOMO and LUMO Kohn-Sham orbitals of **1a**, **1b**, **1c** and **2a** maleimide derivatives.

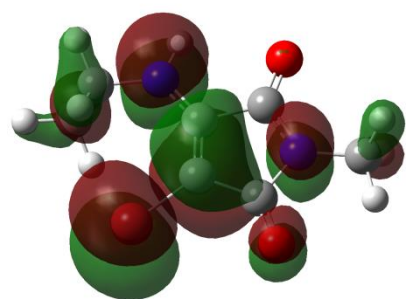

**2b HOMO**

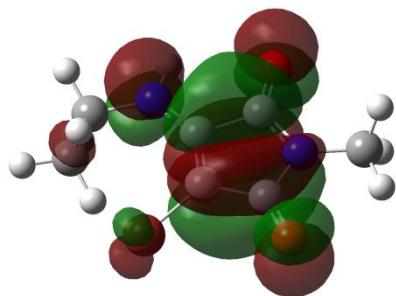

**2b LUMO**

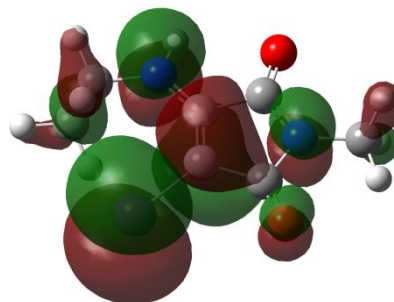

**2c HOMO**

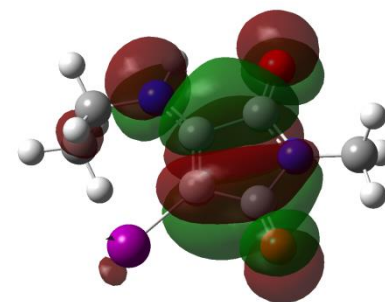

**2c LUMO**

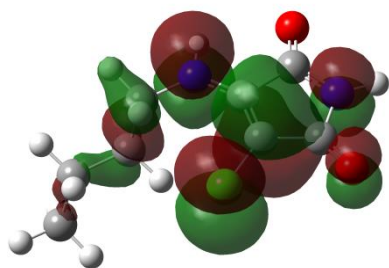

**2d HOMO**

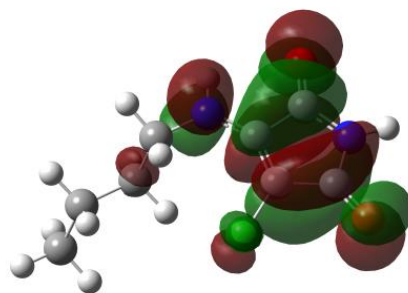

**2d LUMO**

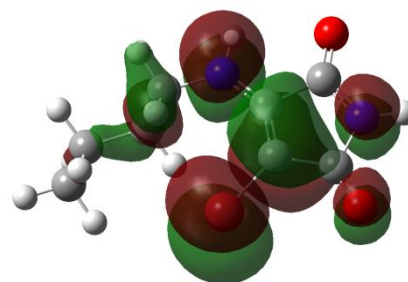

**2e HOMO**

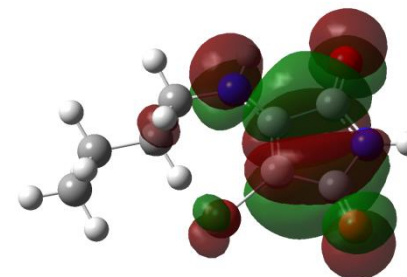

**2e LUMO**

---

Figure S18. HOMO and LUMO Kohn-Sham orbitals of **2b**, **2c**, **2d** and **2e** maleimide derivatives.



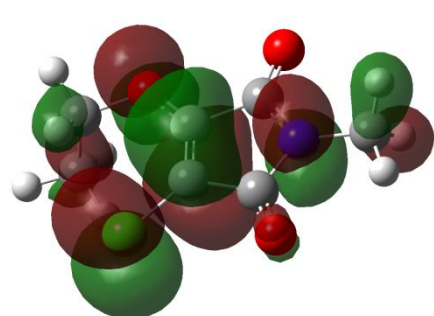

**3a HOMO**

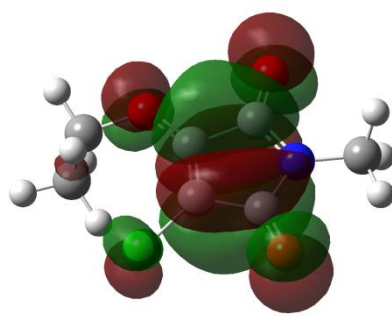

**3a LUMO**

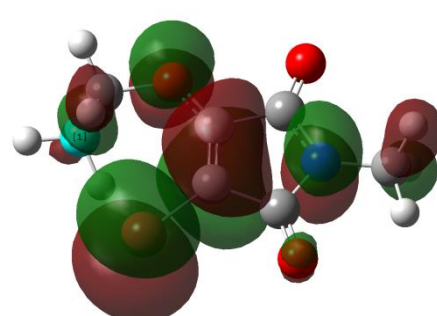

**3b HOMO**

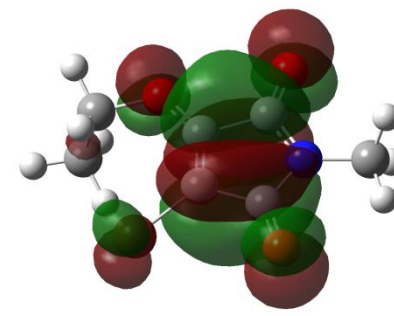

**3b LUMO**

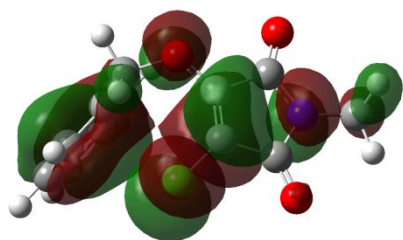

**3d HOMO**

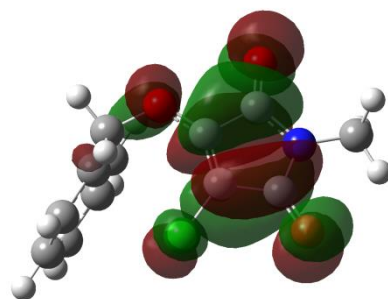

**3d LUMO**

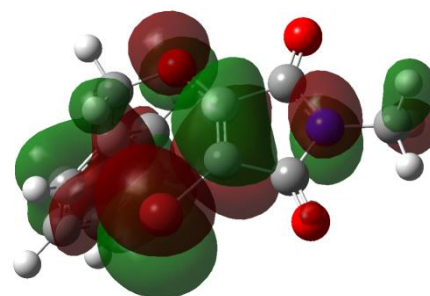

**3c HOMO**

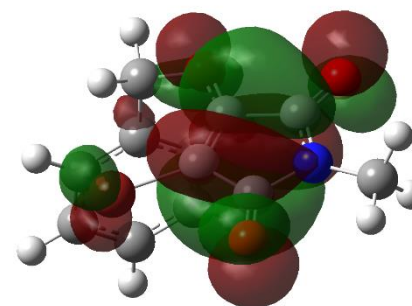

**3c LUMO**

---

---

Figure S19. HOMO and LUMO Kohn-Sham orbitals of **3a**, **3b**, **3c** and **3d** maleimide derivatives.

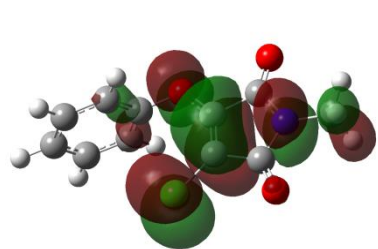

**3e** HOMO

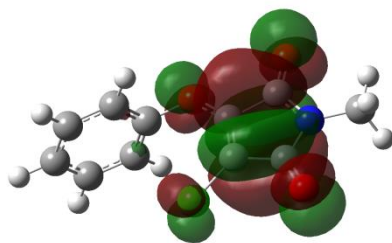

**3e** LUMO

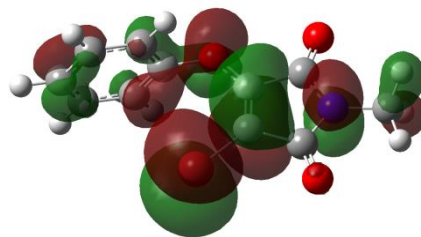

**3f** HOMO

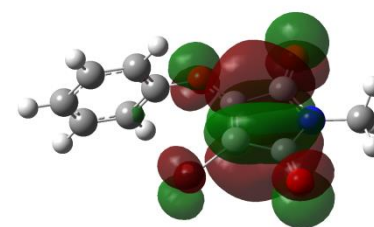

**3f** LUMO

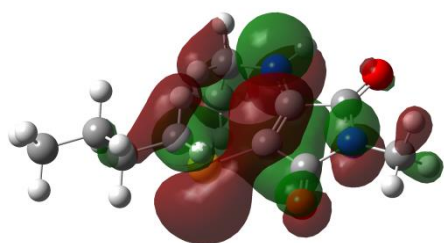

**4a** HOMO

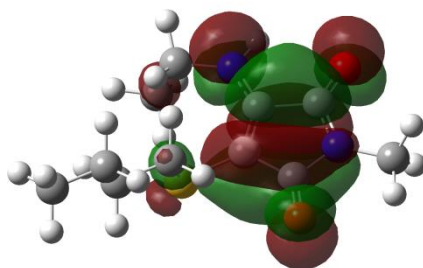

**4a** LUMO

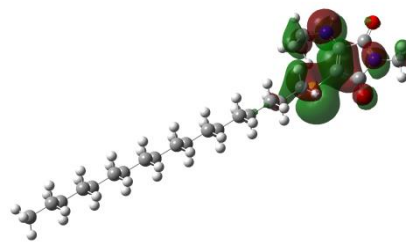

**4b** HOMO

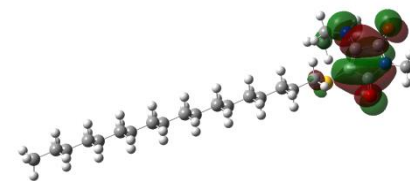

**4b** LUMO

Figure S20. HOMO and LUMO Kohn-Sham orbitals of **3e**, **3f**, **4a**, and **4b** maleimide derivatives.

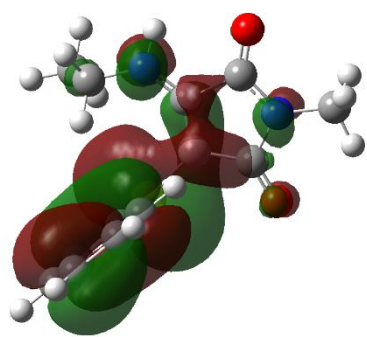

**4c HOMO**

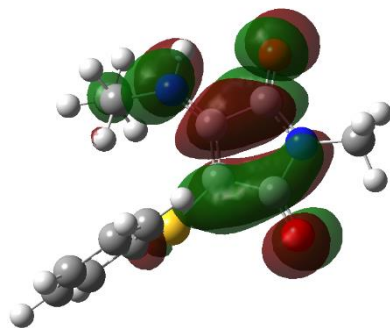

**4c LUMO**

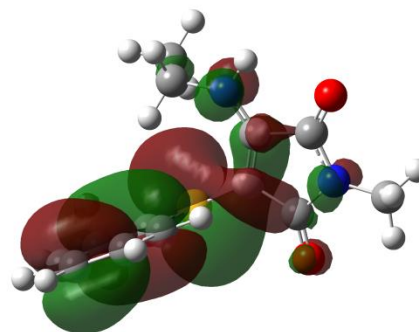

**4d HOMO**

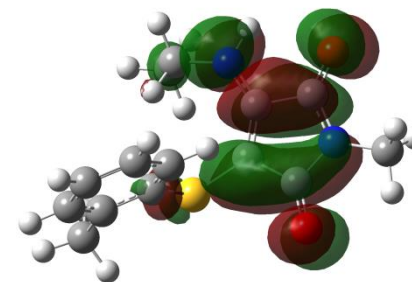

**4d LUMO**

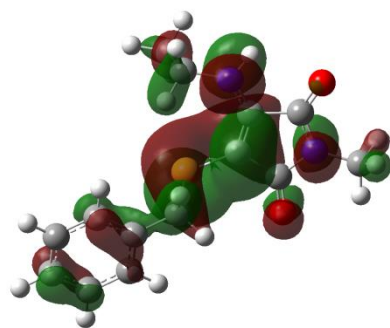

**4e HOMO**

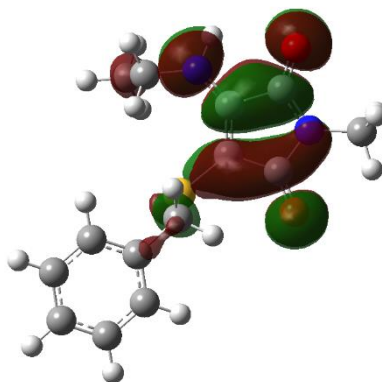

**4e LUMO**

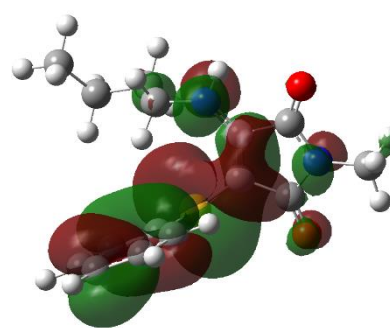

**4f HOMO**

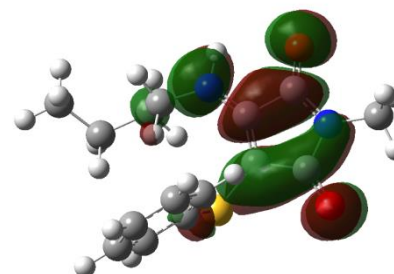

**4f LUMO**

Figure S21. HOMO and LUMO Kohn-Sham orbitals of **4c**, **4d**, **4e** and **4f** maleimide derivatives.

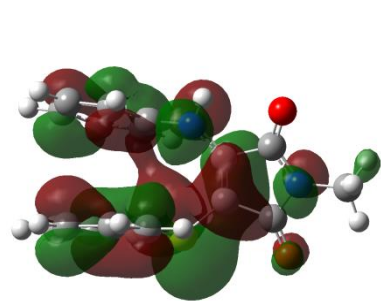

**4g** HOMO

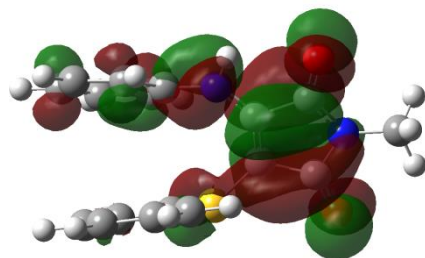

**4g** LUMO

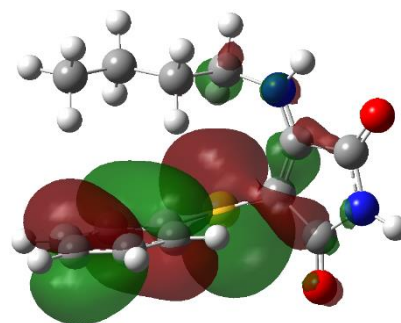

**4h** HOMO

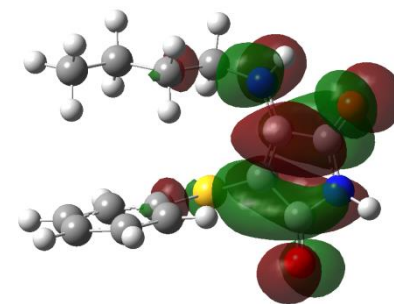

**4h** LUMO

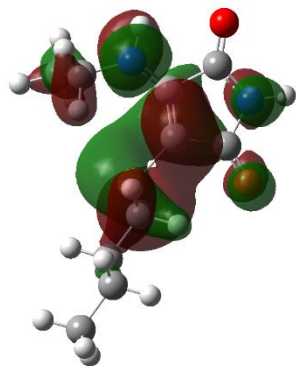

**4i** HOMO

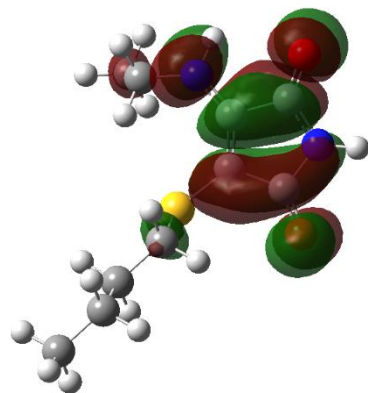

**4i** LUMO

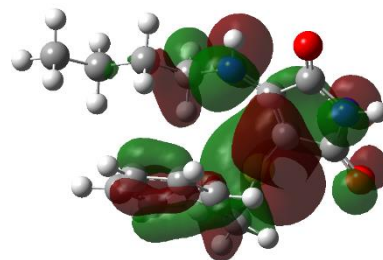

**4j** HOMO

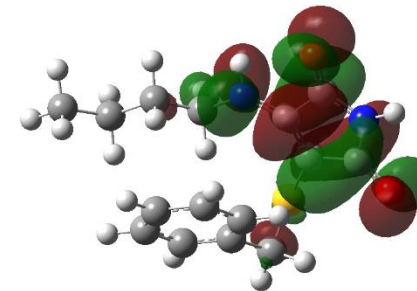

**4j** LUMO

---

---

Figure S22. HOMO and LUMO Kohn-Sham orbitals of **4g**, **4h**, **4i** and **4j** maleimide derivatives.

**Table S4.** Cartesian coordinates (in Å) of the stationary points in the ground state optimized at the CAM-B3LYP-D3BJ/6-311G(d,p) level of theory in solution using the PCM with  $\epsilon = 4.24$ .

|           |           |           |           |           |           |           |           |
|-----------|-----------|-----------|-----------|-----------|-----------|-----------|-----------|
| <b>1a</b> |           |           |           | O         | 2.096949  | 2.225381  | 1.614741  |
| C         | 0.864909  | 1.139077  | -0.001752 | C         | -0.220254 | 0.539015  | 0.918006  |
| C         | -0.569939 | 0.677136  | -0.000135 | H         | -0.116698 | 0.219920  | 1.955216  |
| C         | -0.586832 | -0.650148 | 0.002315  | H         | -0.736506 | 1.498574  | 0.886608  |
| C         | 0.836264  | -1.146833 | 0.001007  | H         | -0.794244 | -0.200975 | 0.365200  |
| N         | 1.631825  | -0.014532 | -0.001932 | N         | 4.342220  | 1.948013  | -0.043250 |
| O         | 1.265302  | 2.267340  | -0.004657 | H         | 4.293207  | 2.534341  | 0.779516  |
| O         | 1.214277  | -2.282938 | 0.002625  | C         | 5.620905  | 1.810330  | -0.727777 |
| C         | 3.082796  | -0.039832 | -0.001653 | H         | 6.157647  | 2.747947  | -0.583891 |
| H         | 3.452921  | -0.529994 | 0.898060  | C         | 6.443295  | 0.636477  | -0.212929 |
| H         | 3.450648  | -0.568592 | -0.879992 | H         | 5.917896  | -0.306008 | -0.374418 |
| H         | 3.427360  | 0.991100  | -0.024105 | H         | 7.397998  | 0.588265  | -0.739966 |
| Cl        | -1.861360 | 1.776889  | -0.000987 | H         | 6.644130  | 0.742228  | 0.854720  |
| Cl        | -1.905628 | -1.716690 | 0.005352  | H         | 5.433594  | 1.709206  | -1.796206 |
|           |           |           |           | Cl        | 3.695361  | -0.421379 | -2.478955 |
| <b>1b</b> |           |           |           | <b>2b</b> |           |           |           |
| C         | -1.425260 | -1.090979 | 0.114405  | C         | 1.457789  | -0.113997 | -0.851235 |
| C         | -0.069890 | -0.456563 | -0.079915 | C         | 2.835552  | 0.276277  | -1.165084 |
| C         | -0.231534 | 0.856101  | -0.203217 | C         | 3.247637  | 1.206088  | -0.270407 |
| C         | -1.704211 | 1.168563  | -0.098332 | C         | 2.089608  | 1.443871  | 0.687368  |
| N         | -2.336708 | -0.047679 | 0.089115  | N         | 1.071550  | 0.639400  | 0.284636  |
| O         | -1.673575 | -2.253254 | 0.260474  | O         | 0.739171  | -0.905930 | -1.400741 |
| O         | -2.233835 | 2.240925  | -0.161487 | O         | 2.112819  | 2.208693  | 1.620030  |
| C         | -3.771339 | -0.203314 | 0.241265  | C         | -0.223704 | 0.548011  | 0.924008  |
| H         | -4.120668 | 0.345845  | 1.114815  | H         | -0.117931 | 0.223520  | 1.959324  |
| H         | -4.287323 | 0.161564  | -0.646027 | H         | -0.732366 | 1.511821  | 0.899069  |
| H         | -3.972711 | -1.263790 | 0.371304  | H         | -0.805920 | -0.185039 | 0.370639  |
| Br        | 1.474886  | -1.476326 | -0.117349 | Br        | 3.726674  | -0.500921 | -2.622747 |
| Br        | 1.023108  | 2.192326  | -0.461961 | N         | 4.340114  | 1.925306  | -0.043360 |
|           |           |           |           | H         | 4.286588  | 2.505844  | 0.783711  |
| <b>1c</b> |           |           |           | C         | 5.621203  | 1.805842  | -0.726079 |
| C         | -1.346667 | -1.340713 | 0.135454  | H         | 6.138471  | 2.756119  | -0.593517 |
| C         | -0.256196 | -0.312673 | -0.061393 | C         | 6.467062  | 0.655975  | -0.196022 |
| C         | -0.824711 | 0.881465  | -0.204375 | H         | 5.961917  | -0.299080 | -0.347576 |
| C         | -2.323235 | 0.709406  | -0.110805 | H         | 7.423747  | 0.622272  | -0.720624 |
| N         | -2.540771 | -0.641430 | 0.090799  | H         | 6.663491  | 0.778386  | 0.870637  |
| O         | -1.219077 | -2.521045 | 0.296806  | H         | 5.435658  | 1.686864  | -1.792589 |
| O         | -3.167947 | 1.555468  | -0.191632 |           |           |           |           |
| C         | -3.854055 | -1.240512 | 0.236768  | <b>2c</b> |           |           |           |
| H         | -4.370715 | -0.812824 | 1.095157  | C         | 1.452543  | -0.113316 | -0.860887 |
| H         | -4.447251 | -1.074885 | -0.661834 | C         | 2.830188  | 0.270521  | -1.189197 |
| H         | -3.711425 | -2.307473 | 0.389530  | C         | 3.247112  | 1.197407  | -0.289756 |
| I         | 1.731796  | -0.871452 | -0.074456 | C         | 2.095502  | 1.438110  | 0.677860  |
| I         | 0.008964  | 2.745927  | -0.507641 | N         | 1.074339  | 0.637817  | 0.279536  |
|           |           |           |           | O         | 0.725156  | -0.902624 | -1.403678 |
| <b>2a</b> |           |           |           | O         | 2.127923  | 2.201056  | 1.612006  |
| C         | 1.476204  | -0.119859 | -0.842751 | C         | -0.216884 | 0.547623  | 0.927400  |
| C         | 2.851062  | 0.283966  | -1.150410 | H         | -0.103834 | 0.224402  | 1.962312  |
| C         | 3.251094  | 1.222803  | -0.262051 | H         | -0.724783 | 1.511912  | 0.905062  |
| C         | 2.086949  | 1.455194  | 0.686551  | H         | -0.803462 | -0.185426 | 0.378783  |
| N         | 1.076971  | 0.638168  | 0.283784  | N         | 4.337877  | 1.915605  | -0.055338 |
| O         | 0.773511  | -0.925263 | -1.393003 |           |           |           |           |

|           |           |           |           |           |           |           |           |
|-----------|-----------|-----------|-----------|-----------|-----------|-----------|-----------|
| H         | 4.275627  | 2.493346  | 0.773649  | H         | -5.509264 | -0.189529 | 0.798581  |
| C         | 5.626979  | 1.804792  | -0.723524 | <b>3a</b> |           |           |           |
| H         | 6.134313  | 2.760366  | -0.591082 | C         | 1.336298  | 0.936175  | 0.083577  |
| C         | 6.477259  | 0.666414  | -0.175956 | C         | -0.122224 | 0.719931  | -0.116697 |
| H         | 5.981348  | -0.294323 | -0.321951 | C         | -0.352667 | -0.597591 | -0.223826 |
| H         | 7.438264  | 0.635314  | -0.692725 | C         | 0.985549  | -1.306789 | -0.094497 |
| H         | 6.664094  | 0.800616  | 0.891030  | N         | 1.930601  | -0.325753 | 0.082819  |
| H         | 5.455482  | 1.678873  | -1.791404 | O         | 1.916012  | 1.978086  | 0.220513  |
| I         | 3.773069  | -0.598993 | -2.829541 | O         | 1.173247  | -2.490889 | -0.137747 |
| <b>2d</b> |           |           |           | C         | 3.348892  | -0.568208 | 0.251788  |
| C         | 2.479933  | 1.044477  | 0.177009  | H         | 3.530727  | -1.161357 | 1.147840  |
| C         | 1.124593  | 0.741599  | -0.293395 | H         | 3.750379  | -1.092662 | -0.614907 |
| C         | 0.964167  | -0.600342 | -0.379413 | H         | 3.835201  | 0.399251  | 0.350477  |
| C         | 2.274614  | -1.234709 | 0.057502  | C         | -2.729806 | -0.849664 | -0.426826 |
| N         | 3.112162  | -0.204309 | 0.362385  | H         | -3.308873 | -1.632546 | -0.910678 |
| O         | 3.001648  | 2.106693  | 0.382105  | C         | -3.226860 | -0.585500 | 0.975791  |
| O         | 2.480181  | -2.419472 | 0.110861  | H         | -2.644277 | 0.192721  | 1.469451  |
| N         | -0.002132 | -1.436215 | -0.742534 | H         | -4.265852 | -0.253619 | 0.933742  |
| H         | 0.226630  | -2.414529 | -0.627079 | H         | -3.178618 | -1.496049 | 1.574035  |
| C         | -1.371660 | -1.069815 | -1.071916 | H         | -2.754776 | 0.040377  | -1.053517 |
| H         | -1.796776 | -1.898630 | -1.639384 | Cl        | -1.169079 | 2.081193  | -0.181622 |
| H         | -1.352771 | -0.204349 | -1.735001 | O         | -1.384382 | -1.384152 | -0.410637 |
| C         | -2.224488 | -0.775602 | 0.157924  | <b>3b</b> |           |           |           |
| C         | -3.641133 | -0.355302 | -0.215998 | C         | -1.301024 | -0.990615 | 0.122374  |
| H         | -1.748653 | 0.018380  | 0.741020  | C         | 0.035125  | -0.367760 | -0.083377 |
| H         | -2.252285 | -1.664748 | 0.795895  | C         | -0.128900 | 0.957100  | -0.227016 |
| C         | -4.504155 | -0.054475 | 1.003773  | C         | -1.618450 | 1.251019  | -0.120870 |
| H         | -3.594313 | 0.529533  | -0.859340 | N         | -2.237778 | 0.043663  | 0.083512  |
| H         | -4.109261 | -1.145384 | -0.812676 | O         | -1.559468 | -2.150496 | 0.291537  |
| H         | -4.591076 | -0.932175 | 1.649281  | O         | -2.141350 | 2.327879  | -0.200590 |
| H         | -4.071436 | 0.753742  | 1.598692  | C         | -3.667158 | -0.132985 | 0.240542  |
| Cl        | 0.017169  | 2.015862  | -0.646073 | H         | -4.026527 | 0.421897  | 1.106927  |
| H         | 4.060692  | -0.308061 | 0.689122  | H         | -4.192813 | 0.210359  | -0.650205 |
| H         | -5.512192 | 0.247498  | 0.713290  | H         | -3.850501 | -1.194836 | 0.385739  |
| <b>2e</b> |           |           |           | Br        | 1.544969  | -1.475186 | -0.115199 |
| C         | 2.517878  | 0.720056  | 0.348404  | C         | 2.067251  | 1.914240  | -0.421325 |
| C         | 1.156747  | 0.486679  | -0.145756 | H         | 2.386653  | 2.815236  | -0.939631 |
| C         | 0.986856  | -0.836751 | -0.385464 | C         | 2.594799  | 1.877337  | 0.994312  |
| C         | 2.296517  | -1.528409 | -0.034671 | H         | 2.269605  | 0.979601  | 1.520667  |
| N         | 3.142177  | -0.546984 | 0.382664  | H         | 3.686160  | 1.879167  | 0.972817  |
| O         | 3.053691  | 1.744453  | 0.674777  | H         | 2.257971  | 2.753984  | 1.548694  |
| O         | 2.492302  | -2.712950 | -0.122456 | H         | 2.375103  | 1.047748  | -1.003688 |
| Br        | -0.027332 | 1.928070  | -0.348928 | O         | 0.623082  | 2.009873  | -0.434222 |
| N         | 0.019476  | -1.627154 | -0.834873 | <b>3c</b> |           |           |           |
| H         | 0.254754  | -2.611002 | -0.835038 | C         | 1.224140  | 0.906986  | 0.180438  |
| C         | -1.352576 | -1.236618 | -1.122020 | C         | -0.219019 | 0.717015  | -0.142358 |
| H         | -1.766286 | -1.991220 | -1.792281 | C         | -0.449233 | -0.589927 | -0.320392 |
| H         | -1.340439 | -0.293678 | -1.669086 | C         | 0.860902  | -1.322710 | -0.102120 |
| C         | -2.212185 | -1.110494 | 0.131328  | N         | 1.802239  | -0.361496 | 0.179229  |
| C         | -3.629831 | -0.653098 | -0.191685 | O         | 1.799957  | 1.936213  | 0.400013  |
| H         | -1.743517 | -0.396235 | 0.814545  | O         | 1.033244  | -2.509197 | -0.153253 |
| H         | -2.236999 | -2.075111 | 0.648407  | C         | 3.197724  | -0.631372 | 0.460796  |
| C         | -4.499950 | -0.518963 | 1.052442  | H         | 3.289675  | -1.294206 | 1.320777  |
| H         | -3.585262 | 0.308424  | -0.713658 | H         | 3.679232  | -1.091137 | -0.402007 |
| H         | -4.090477 | -1.360844 | -0.889045 | H         | 3.676005  | 0.320118  | 0.680259  |
| H         | -4.582188 | -1.473436 | 1.578635  | C         | -2.817434 | -0.826255 | -0.525748 |
| H         | -4.075971 | 0.208653  | 1.749001  | H         | -3.427169 | -1.609020 | -0.974339 |
| H         | 4.092045  | -0.693773 | 0.688479  |           |           |           |           |

H -2.909395 0.073399 -1.132820  
Cl -1.242785 2.088027 -0.255538  
O -1.479427 -1.352643 -0.619863  
C -3.220109 -0.574046 0.902332  
C -4.086527 0.469665 1.204180  
C -2.761859 -1.399877 1.923947  
C -4.499331 0.682434 2.511558  
H -4.434112 1.126033 0.414555  
C -3.164509 -1.179422 3.232452  
H -2.083046 -2.212065 1.693156  
C -4.036278 -0.140025 3.528836  
H -5.173481 1.499666 2.736907  
H -2.798139 -1.823018 4.022907  
H -4.350178 0.031082 4.551261

### 3d

C -1.153598 -0.951408 0.170379  
C 0.159434 -0.325914 -0.161221  
C -0.028618 0.989734 -0.329453  
C -1.499566 1.283545 -0.091039  
N -2.095409 0.077628 0.185607  
O -1.387740 -2.108403 0.384991  
O -2.027509 2.360817 -0.124035  
C -3.502405 -0.097937 0.483682  
H -3.779804 0.481189 1.364205  
H -4.112897 0.217374 -0.362126  
H -3.665379 -1.155545 0.676216  
Br 1.667688 -1.418495 -0.314419  
C 2.140032 1.984693 -0.520845  
H 2.463288 2.916194 -0.983118  
H 2.531944 1.154052 -1.105930  
O 0.705064 2.039113 -0.633534  
C 2.583434 1.908169 0.915599  
C 3.752493 1.232547 1.244637  
C 1.854116 2.540734 1.917303  
C 4.193994 1.194814 2.559330  
H 4.317219 0.725416 0.470750  
C 2.289014 2.492538 3.233275  
H 0.940925 3.065998 1.664986  
C 3.460944 1.821926 3.556994  
H 5.105440 0.664222 2.806093  
H 1.711639 2.982436 4.007807  
H 3.799667 1.784923 4.585121

### 3e

C -2.170679 -0.716178 0.769833  
C -0.801335 -0.499213 0.215351  
C -0.752946 0.728893 -0.312095  
C -2.107125 1.379239 -0.123620  
N -2.889117 0.451221 0.527217  
O -2.598698 -1.691744 1.320880  
O -2.424013 2.481395 -0.474692  
Cl 0.374637 -1.737863 0.331821  
O 0.156969 1.465771 -0.927221  
C -4.271449 0.652286 0.913510  
H -4.908284 -0.098707 0.447372  
H -4.377486 0.592188 1.996301  
H -4.565293 1.642423 0.573118  
C 1.436552 0.934693 -1.141604  
C 1.686344 0.258829 -2.319443

C 2.412347 1.148534 -0.188357  
C 2.962418 -0.239870 -2.538076  
H 0.892126 0.124471 -3.042279  
C 3.684247 0.644762 -0.419165  
H 2.172176 1.693302 0.715459  
C 3.958420 -0.051668 -1.588901  
H 3.176983 -0.777451 -3.452988  
H 4.461833 0.797175 0.318550  
H 4.952360 -0.443589 -1.763887

### 3f

C -2.303185 0.864033 -0.550841  
C -0.827052 0.648519 -0.482922  
C -0.607356 -0.559947 0.048179  
C -1.948208 -1.196453 0.355819  
N -2.900682 -0.285573 -0.033018  
O -2.890750 1.824298 -0.964636  
O -2.134541 -2.276758 0.842847  
O 0.450141 -1.294915 0.348270  
C -4.330647 -0.488572 0.084268  
H -4.818979 0.400082 -0.308142  
H -4.639373 -1.360008 -0.492578  
H -4.611216 -0.628972 1.127879  
C 1.734780 -0.753711 0.207144  
C 2.454823 -1.049463 -0.932869  
C 2.253802 0.009848 1.234439  
C 3.738442 -0.537280 -1.055832  
H 2.009633 -1.661490 -1.706347  
C 3.537748 0.516765 1.098639  
H 1.657150 0.205166 2.116094  
C 4.277326 0.248573 -0.045814  
H 4.317112 -0.752318 -1.945220  
H 3.959739 1.123238 1.889966  
H 5.278652 0.647507 -0.147727  
Br 0.325387 1.974869 -1.112633

### 4a

C -1.442798 -1.076303 0.302654  
C -0.077374 -0.569172 0.099866  
C -0.173501 0.757198 -0.200204  
C -1.643625 1.141488 -0.180641  
N -2.334580 0.012548 0.117387  
O -1.817422 -2.190826 0.563696  
O -2.076629 2.248221 -0.398170  
C -3.773994 -0.079141 0.226901  
H -4.139978 0.556863 1.033384  
H -4.249178 0.218936 -0.707967  
H -4.015506 -1.116922 0.444634  
N 0.665465 1.738044 -0.501350  
H 0.222936 2.639977 -0.624232  
C 2.119759 1.667753 -0.523514  
H 2.464435 2.444854 -1.206207  
C 2.737359 1.851563 0.855553  
H 2.412858 1.059721 1.531855  
H 3.826136 1.813515 0.786105  
H 2.453034 2.814376 1.284200  
H 2.410452 0.705931 -0.943203  
S 1.331067 -1.595161 0.289873  
C 1.337057 -2.486397 -1.309668  
C 2.490427 -3.476023 -1.351175

|   |          |           |           |
|---|----------|-----------|-----------|
| H | 1.423688 | -1.752720 | -2.112814 |
| H | 0.381747 | -3.002479 | -1.408667 |
| C | 2.536114 | -4.253154 | -2.664192 |
| H | 3.437060 | -2.943608 | -1.210439 |
| H | 2.398465 | -4.178029 | -0.516255 |
| C | 3.686468 | -5.251974 | -2.713123 |
| H | 1.586029 | -4.778680 | -2.803875 |
| H | 2.624293 | -3.548738 | -3.497841 |
| H | 3.700712 | -5.796641 | -3.659224 |
| H | 4.649784 | -4.747044 | -2.603742 |
| H | 3.603135 | -5.985153 | -1.906841 |

**4b**

|   |           |           |           |
|---|-----------|-----------|-----------|
| C | 8.350213  | -1.559488 | -0.499973 |
| C | 7.916037  | -0.165981 | -0.319063 |
| C | 8.747881  | 0.406317  | 0.596997  |
| C | 9.768779  | -0.634705 | 1.024822  |
| N | 9.472648  | -1.769828 | 0.343424  |
| O | 7.887919  | -2.423602 | -1.200068 |
| O | 10.656787 | -0.451348 | 1.823299  |
| C | 10.189464 | -3.021005 | 0.457478  |
| H | 11.231450 | -2.894721 | 0.162519  |
| H | 10.149851 | -3.394927 | 1.480936  |
| H | 9.706365  | -3.731606 | -0.209096 |
| N | 8.865805  | 1.589725  | 1.182210  |
| H | 9.662179  | 1.667859  | 1.801971  |
| C | 8.077715  | 2.783139  | 0.908121  |
| H | 8.116682  | 3.401650  | 1.805175  |
| C | 8.585057  | 3.557377  | -0.300266 |
| H | 8.524282  | 2.947021  | -1.202175 |
| H | 7.977402  | 4.451175  | -0.453703 |
| H | 9.622194  | 3.866288  | -0.157352 |
| H | 7.041652  | 2.483770  | 0.757523  |
| S | 6.578544  | 0.515751  | -1.223715 |
| C | 5.147235  | -0.128244 | -0.280401 |
| C | 3.850167  | 0.384314  | -0.885699 |
| H | 5.247325  | 0.194878  | 0.756936  |
| H | 5.185292  | -1.217421 | -0.312967 |
| C | 2.623060  | -0.151162 | -0.153807 |
| H | 3.842198  | 1.478963  | -0.860857 |
| H | 3.799725  | 0.094202  | -1.940019 |
| C | 1.311585  | 0.366576  | -0.733724 |
| H | 2.629581  | -1.246175 | -0.191006 |
| H | 2.683490  | 0.121448  | 0.905990  |
| H | 1.300549  | 1.461505  | -0.682014 |
| H | 1.260984  | 0.110335  | -1.798195 |
| C | 0.079698  | -0.184701 | -0.024677 |
| C | -1.231937 | 0.345500  | -0.592818 |
| H | 0.136189  | 0.058629  | 1.042859  |
| H | 0.085823  | -1.279057 | -0.088888 |
| C | -2.465953 | -0.222856 | 0.098976  |
| H | -1.244083 | 1.439010  | -0.514411 |
| H | -1.280785 | 0.116354  | -1.663804 |
| C | -3.776838 | 0.316975  | -0.461819 |
| H | -2.457795 | -1.315668 | 0.011214  |
| H | -2.413691 | -0.002960 | 1.171839  |
| H | -3.790008 | 1.408828  | -0.362838 |
| H | -3.823085 | 0.108187  | -1.537132 |
| C | -5.012213 | -0.264902 | 0.216188  |
| C | -6.322331 | 0.281666  | -0.339884 |

|   |            |           |           |
|---|------------|-----------|-----------|
| H | -4.963848  | -0.062652 | 1.292698  |
| H | -5.001850  | -1.356137 | 0.110544  |
| C | -7.558724  | -0.309984 | 0.327735  |
| H | -6.336439  | 1.372067  | -0.226090 |
| H | -6.366223  | 0.087525  | -1.418055 |
| C | -8.868206  | 0.240812  | -0.225660 |
| H | -7.546339  | -1.399937 | 0.209690  |
| H | -7.513664  | -0.119975 | 1.406614  |
| H | -8.883103  | 1.330149  | -0.102226 |
| H | -8.910215  | 0.056195  | -1.305582 |
| C | -10.105321 | -0.357278 | 0.434839  |
| C | -11.414322 | 0.196096  | -0.117142 |
| H | -10.062700 | -0.175166 | 1.515173  |
| H | -10.091452 | -1.446319 | 0.308810  |
| C | -12.651958 | -0.405766 | 0.539048  |
| H | -11.429669 | 1.284747  | 0.012069  |
| H | -11.455089 | 0.017193  | -1.198067 |
| C | -13.960622 | 0.148881  | -0.012201 |
| H | -12.637077 | -1.494271 | 0.408482  |
| H | -12.610826 | -0.228084 | 1.620186  |
| H | -13.976832 | 1.237365  | 0.119503  |
| H | -14.001738 | -0.027332 | -1.093704 |
| C | -15.199566 | -0.453997 | 0.641720  |
| H | -15.182586 | -1.541225 | 0.509227  |
| H | -15.157246 | -0.277982 | 1.722073  |
| C | -16.501848 | 0.108321  | 0.083235  |
| H | -17.372803 | -0.339110 | 0.566907  |
| H | -16.557389 | 1.190131  | 0.231637  |
| H | -16.582511 | -0.081873 | -0.990404 |

**4c**

|   |           |           |           |
|---|-----------|-----------|-----------|
| C | -1.642071 | -1.115150 | 0.689053  |
| C | -0.295102 | -0.719095 | 0.252710  |
| C | -0.374019 | 0.556030  | -0.229137 |
| C | -1.814840 | 1.021472  | -0.095977 |
| N | -2.504086 | -0.011230 | 0.449044  |
| O | -2.025718 | -2.151753 | 1.163730  |
| O | -2.225264 | 2.109402  | -0.422815 |
| C | -3.915880 | 0.006043  | 0.766148  |
| H | -4.135486 | 0.783285  | 1.498531  |
| H | -4.507636 | 0.182188  | -0.132245 |
| H | -4.164719 | -0.967447 | 1.181964  |
| N | 0.456752  | 1.419791  | -0.785472 |
| H | 0.036830  | 2.313860  | -1.008615 |
| C | 1.892835  | 1.259120  | -0.977296 |
| H | 2.172265  | 1.905493  | -1.809339 |
| C | 2.694204  | 1.609196  | 0.267947  |
| H | 2.431440  | 0.945741  | 1.092532  |
| H | 3.761223  | 1.496666  | 0.067080  |
| H | 2.508370  | 2.640129  | 0.574737  |
| H | 2.087354  | 0.232360  | -1.283706 |
| S | 1.085358  | -1.775158 | 0.424836  |
| C | 1.310571  | -2.459166 | -1.211470 |
| C | 2.463131  | -3.213480 | -1.420076 |
| C | 0.410601  | -2.271833 | -2.252505 |
| C | 2.706633  | -3.777515 | -2.662114 |
| H | 3.169317  | -3.357919 | -0.610386 |
| C | 0.665055  | -2.837013 | -3.494880 |
| H | -0.487565 | -1.689372 | -2.096056 |
| C | 1.809840  | -3.590884 | -3.706541 |



|   |           |           |           |
|---|-----------|-----------|-----------|
| H | 3.604914  | -4.363665 | -2.814183 |
| H | -0.043050 | -2.686404 | -4.300956 |
| H | 2.003203  | -4.030153 | -4.677153 |

#### 4d

|   |           |           |           |
|---|-----------|-----------|-----------|
| C | -1.924527 | -1.224364 | 0.779707  |
| C | -1.116774 | -0.004874 | 0.634870  |
| C | -1.650037 | 0.726222  | -0.387031 |
| C | -2.858155 | -0.024519 | -0.922745 |
| N | -2.958699 | -1.162907 | -0.192702 |
| O | -1.799994 | -2.145325 | 1.543524  |
| O | -3.565658 | 0.353737  | -1.825617 |
| C | -3.984332 | -2.170129 | -0.358702 |
| H | -4.971815 | -1.747549 | -0.171395 |
| H | -3.955931 | -2.582290 | -1.367452 |
| H | -3.782514 | -2.958025 | 0.363102  |
| N | -1.355106 | 1.854403  | -1.008863 |
| H | -2.009713 | 2.110077  | -1.737904 |
| C | -0.278580 | 2.781623  | -0.683160 |
| H | -0.035949 | 3.315609  | -1.602050 |
| C | -0.655517 | 3.758061  | 0.421147  |
| H | -0.875472 | 3.224873  | 1.346540  |
| H | 0.173821  | 4.442141  | 0.610773  |
| H | -1.529896 | 4.347488  | 0.139397  |
| H | 0.600227  | 2.202877  | -0.402225 |
| S | 0.220848  | 0.354289  | 1.699021  |
| C | 1.663095  | -0.117583 | 0.747712  |
| C | 2.916085  | 0.186850  | 1.297869  |
| C | 1.569103  | -0.749918 | -0.485332 |
| C | 4.050709  | -0.161860 | 0.573131  |
| C | 2.716444  | -1.086723 | -1.187930 |
| H | 0.596439  | -0.982614 | -0.897655 |
| C | 3.963269  | -0.792367 | -0.659727 |
| H | 5.024245  | 0.069810  | 0.990526  |
| H | 2.629543  | -1.581908 | -2.147460 |
| H | 4.864223  | -1.051832 | -1.201723 |
| C | 3.038933  | 0.869167  | 2.631288  |
| H | 2.532102  | 1.838007  | 2.630676  |
| H | 2.586783  | 0.272347  | 3.427996  |
| H | 4.085562  | 1.033241  | 2.885468  |

#### 4e

|   |           |           |           |
|---|-----------|-----------|-----------|
| C | -1.460043 | -1.107981 | 0.032567  |
| C | -0.081295 | -0.597800 | 0.026290  |
| C | -0.146506 | 0.758443  | -0.100418 |
| C | -1.611831 | 1.157060  | -0.161884 |
| N | -2.329140 | 0.007767  | -0.083141 |
| O | -1.856142 | -2.243369 | 0.102412  |
| O | -2.020962 | 2.288783  | -0.266562 |
| C | -3.772756 | -0.077732 | -0.123193 |
| H | -4.212726 | 0.463006  | 0.715072  |
| H | -4.155972 | 0.335245  | -1.056653 |
| H | -4.036005 | -1.130750 | -0.055002 |
| N | 0.718879  | 1.757682  | -0.187602 |
| H | 0.292182  | 2.674662  | -0.227118 |
| C | 2.169156  | 1.667591  | -0.085515 |
| H | 2.577709  | 2.532490  | -0.608597 |
| C | 2.654651  | 1.632794  | 1.356759  |
| H | 2.259665  | 0.758572  | 1.875767  |
| H | 3.744547  | 1.578480  | 1.383002  |

|   |          |           |           |
|---|----------|-----------|-----------|
| H | 2.340952 | 2.529031  | 1.895060  |
| H | 2.496415 | 0.774977  | -0.616554 |
| S | 1.299501 | -1.661212 | 0.204593  |
| C | 1.406614 | -2.377694 | -1.489568 |
| H | 1.537357 | -1.558822 | -2.195708 |
| H | 0.462623 | -2.880464 | -1.692739 |
| C | 2.557321 | -3.336412 | -1.546424 |
| C | 2.383968 | -4.669640 | -1.183394 |
| C | 3.823145 | -2.901936 | -1.930717 |
| C | 3.453039 | -5.553009 | -1.211627 |
| H | 1.402563 | -5.014034 | -0.877305 |
| C | 4.893839 | -3.783527 | -1.960525 |
| H | 3.967770 | -1.864657 | -2.212225 |
| C | 4.710763 | -5.111906 | -1.600893 |
| H | 3.303617 | -6.588515 | -0.930580 |
| H | 5.872324 | -3.433548 | -2.266736 |
| H | 5.545622 | -5.801717 | -1.624949 |

#### 4f

|   |           |           |           |
|---|-----------|-----------|-----------|
| C | -1.704162 | -1.114537 | 0.733138  |
| C | -0.342381 | -0.722704 | 0.343984  |
| C | -0.391183 | 0.571220  | -0.090152 |
| C | -1.827853 | 1.053234  | 0.028771  |
| N | -2.544317 | 0.011407  | 0.518517  |
| O | -2.113814 | -2.162948 | 1.157935  |
| O | -2.215204 | 2.159039  | -0.264755 |
| C | -3.962123 | 0.039362  | 0.806683  |
| H | -4.181967 | 0.761745  | 1.593416  |
| H | -4.526951 | 0.300820  | -0.088073 |
| H | -4.244195 | -0.956952 | 1.138927  |
| N | 0.463668  | 1.440688  | -0.597268 |
| H | 0.062594  | 2.349909  | -0.800144 |
| C | 1.909449  | 1.278097  | -0.763325 |
| C | 2.642823  | 1.644405  | 0.521679  |
| H | 2.300754  | 1.024421  | 1.350972  |
| H | 3.716173  | 1.487937  | 0.398747  |
| H | 2.473966  | 2.693629  | 0.776033  |
| H | 2.085942  | 0.226625  | -0.985053 |
| S | 1.013679  | -1.813981 | 0.493593  |
| C | 1.333844  | -2.328224 | -1.188747 |
| C | 2.523721  | -3.015696 | -1.417148 |
| C | 0.472055  | -2.069245 | -2.246889 |
| C | 2.842266  | -3.443282 | -2.696261 |
| H | 3.201267  | -3.212759 | -0.594266 |
| C | 0.802415  | -2.495886 | -3.526071 |
| H | -0.454278 | -1.537426 | -2.074912 |
| C | 1.984689  | -3.183445 | -3.757658 |
| H | 3.769241  | -3.978263 | -2.863875 |
| H | 0.124359  | -2.289747 | -4.345562 |
| H | 2.237520  | -3.514289 | -4.757184 |
| C | 2.355428  | 2.115369  | -1.951679 |
| H | 2.156295  | 3.176615  | -1.776825 |
| H | 3.427603  | 1.997840  | -2.111014 |
| H | 1.835701  | 1.808486  | -2.860301 |

#### 4g

|   |           |           |           |
|---|-----------|-----------|-----------|
| C | -1.532746 | -1.080278 | 0.570945  |
| C | -0.181162 | -0.674970 | 0.134473  |
| C | -0.275375 | 0.581230  | -0.373785 |
| C | -1.722972 | 1.015017  | -0.297230 |

|   |           |           |           |
|---|-----------|-----------|-----------|
| N | -2.405602 | -0.005453 | 0.289552  |
| O | -1.892237 | -2.115567 | 1.066682  |
| O | -2.154683 | 2.072627  | -0.687987 |
| C | -3.822302 | 0.000729  | 0.585358  |
| H | -4.064999 | 0.796802  | 1.289657  |
| H | -4.401704 | 0.139788  | -0.327340 |
| H | -4.065083 | -0.962869 | 1.027117  |
| N | 0.555407  | 1.450736  | -0.958951 |
| H | 0.092045  | 2.254157  | -1.366973 |
| S | 1.156256  | -1.799044 | 0.221752  |
| C | 1.813491  | -1.728466 | -1.438480 |
| C | 3.189257  | -1.855200 | -1.591144 |
| C | 0.999478  | -1.579037 | -2.555374 |
| C | 3.747557  | -1.833248 | -2.860184 |
| H | 3.821998  | -1.947060 | -0.717606 |
| C | 1.567300  | -1.538655 | -3.819089 |
| H | -0.072612 | -1.488805 | -2.436913 |
| C | 2.941163  | -1.666503 | -3.976845 |
| H | 4.820720  | -1.927165 | -2.972549 |
| H | 0.929827  | -1.414421 | -4.686212 |
| H | 3.380557  | -1.635275 | -4.966174 |
| C | 1.969687  | 1.445348  | -0.936808 |
| C | 2.662744  | 1.791932  | -2.091313 |
| C | 2.657950  | 1.132824  | 0.229047  |
| C | 4.046599  | 1.811886  | -2.080586 |
| H | 2.112165  | 2.021724  | -2.995141 |
| C | 4.044845  | 1.141598  | 0.225729  |
| H | 2.110365  | 0.894558  | 1.130141  |
| C | 4.742242  | 1.478284  | -0.924948 |
| H | 4.584546  | 2.074026  | -2.983083 |
| H | 4.580549  | 0.890785  | 1.132914  |
| H | 5.825095  | 1.484708  | -0.921974 |

#### 4h

|   |           |           |           |
|---|-----------|-----------|-----------|
| C | -1.825504 | -2.618948 | 1.184467  |
| C | -1.652685 | -1.184862 | 1.460135  |
| C | -2.639511 | -0.508100 | 0.798054  |
| C | -3.493218 | -1.524210 | 0.052234  |
| N | -2.951782 | -2.737407 | 0.334084  |
| O | -1.177824 | -3.560174 | 1.559002  |
| O | -4.441915 | -1.252773 | -0.639434 |
| N | -3.008683 | 0.752924  | 0.659502  |
| H | -3.796609 | 0.890541  | 0.038657  |
| S | -0.424312 | -0.597072 | 2.558693  |
| H | -3.295404 | -3.618004 | -0.018277 |
| C | -2.299713 | 1.921885  | 1.163248  |
| C | -1.139479 | 2.332690  | 0.261869  |
| H | -1.935234 | 1.696139  | 2.163994  |
| H | -3.028314 | 2.728786  | 1.251038  |
| C | -0.269807 | 3.412582  | 0.893604  |
| H | -0.523453 | 1.454532  | 0.056122  |
| H | -1.531253 | 2.677446  | -0.700565 |
| C | 0.912682  | 3.792511  | 0.010490  |
| H | -0.876775 | 4.299155  | 1.106067  |
| H | 0.098219  | 3.049147  | 1.858579  |
| H | 1.527587  | 4.563694  | 0.478835  |
| H | 1.549300  | 2.924555  | -0.176305 |
| H | 0.574519  | 4.176000  | -0.955758 |
| C | 0.986055  | -0.281683 | 1.506458  |
| C | 2.004676  | 0.501601  | 2.042423  |

|   |          |           |           |
|---|----------|-----------|-----------|
| C | 1.102684 | -0.777550 | 0.214204  |
| C | 3.131367 | 0.785522  | 1.286328  |
| H | 1.912033 | 0.895635  | 3.047897  |
| C | 2.229942 | -0.481130 | -0.538993 |
| H | 0.313933 | -1.385775 | -0.207964 |
| C | 3.247949 | 0.299023  | -0.009065 |
| H | 3.917165 | 1.398826  | 1.710422  |
| H | 2.311545 | -0.868867 | -1.547302 |
| H | 4.125579 | 0.527074  | -0.600818 |

#### 4i

|   |           |           |           |
|---|-----------|-----------|-----------|
| C | -1.444259 | -1.064144 | 0.289381  |
| C | -0.079997 | -0.551415 | 0.087099  |
| C | -0.175032 | 0.776293  | -0.210786 |
| C | -1.645154 | 1.166148  | -0.193263 |
| N | -2.325431 | 0.028083  | 0.104786  |
| O | -1.817161 | -2.178519 | 0.548710  |
| O | -2.070638 | 2.273146  | -0.409509 |
| N | 0.666581  | 1.756406  | -0.508228 |
| H | 0.226119  | 2.659499  | -0.629685 |
| C | 2.120882  | 1.683959  | -0.524518 |
| H | 2.469728  | 2.462620  | -1.203223 |
| C | 2.733891  | 1.861626  | 0.857418  |
| H | 2.404222  | 1.068875  | 1.530115  |
| H | 3.822677  | 1.819408  | 0.791296  |
| H | 2.452076  | 2.824176  | 1.288156  |
| H | 2.411715  | 0.723130  | -0.946100 |
| S | 1.328894  | -1.576504 | 0.280265  |
| C | 1.337452  | -2.468854 | -1.318569 |
| C | 2.474301  | -3.478059 | -1.345705 |
| H | 1.445686  | -1.737928 | -2.121581 |
| H | 0.374826  | -2.969140 | -1.427140 |
| C | 2.531408  | -4.246242 | -2.663550 |
| H | 3.427335  | -2.963419 | -1.183390 |
| H | 2.354043  | -4.183816 | -0.517670 |
| C | 3.660324  | -5.269963 | -2.695466 |
| H | 1.573269  | -4.749560 | -2.828038 |
| H | 2.653396  | -3.537873 | -3.489507 |
| H | 3.684038  | -5.806667 | -3.645901 |
| H | 4.631799  | -4.787541 | -2.559877 |
| H | 3.542438  | -6.007940 | -1.897980 |
| H | -3.328884 | -0.042215 | 0.178246  |

#### 4j

|   |           |           |           |
|---|-----------|-----------|-----------|
| C | -1.056031 | -2.800211 | 0.948325  |
| C | -0.766376 | -1.363568 | 1.049129  |
| C | -1.872781 | -0.683903 | 0.622595  |
| C | -2.941774 | -1.701525 | 0.251050  |
| N | -2.381378 | -2.920567 | 0.464042  |
| O | -0.353045 | -3.747272 | 1.189623  |
| O | -4.044043 | -1.430361 | -0.154883 |
| N | -2.221474 | 0.578953  | 0.451098  |
| H | -3.172925 | 0.707629  | 0.126775  |
| S | 0.782091  | -0.782151 | 1.619858  |
| H | -2.841547 | -3.803728 | 0.303874  |
| C | -1.418262 | 1.767668  | 0.690809  |
| C | -1.719412 | 2.834569  | -0.348227 |
| H | -0.370266 | 1.482607  | 0.648259  |
| H | -1.615065 | 2.145124  | 1.700093  |
| C | -0.890562 | 4.095097  | -0.131968 |

|   |           |           |           |
|---|-----------|-----------|-----------|
| H | -1.512523 | 2.423214  | -1.339484 |
| H | -2.785993 | 3.086874  | -0.319389 |
| C | -1.128020 | 5.141161  | -1.214049 |
| H | -1.120379 | 4.519470  | 0.850752  |
| H | 0.169449  | 3.824144  | -0.111579 |
| H | -0.528119 | 6.036764  | -1.041494 |
| H | -0.866311 | 4.747391  | -2.199608 |
| H | -2.177910 | 5.443639  | -1.246081 |
| C | 1.815730  | -1.000872 | 0.107702  |
| H | 2.821175  | -0.728658 | 0.429401  |
| H | 1.811377  | -2.060995 | -0.140010 |
| C | 1.360642  | -0.159264 | -1.042545 |
| C | 1.798993  | 1.156473  | -1.182143 |
| C | 0.456825  | -0.665955 | -1.973138 |
| C | 1.346181  | 1.946556  | -2.227530 |
| H | 2.501589  | 1.562982  | -0.462877 |
| C | -0.003915 | 0.125033  | -3.016803 |
| H | 0.117715  | -1.691267 | -1.883102 |
| C | 0.439689  | 1.433284  | -3.147046 |
| H | 1.700621  | 2.965558  | -2.326184 |
| H | -0.707148 | -0.283964 | -3.732195 |
| H | 0.084477  | 2.050529  | -3.963284 |

**Table S5.** Cartesian coordinates (in Å) of the stationary points in the first excited state optimized at the CAM-B3LYP-D3BJ/6-311G(d,p) level of theory in solution using the PCM with  $\epsilon = 4.24$ .

|           |           |           |           |           |           |           |           |
|-----------|-----------|-----------|-----------|-----------|-----------|-----------|-----------|
| <b>1a</b> |           |           |           | O         | 2.025941  | 2.257151  | 1.668702  |
| C         | 0.829009  | 1.213256  | -0.002687 | C         | -0.202439 | 0.543207  | 0.871247  |
| C         | -0.499378 | 0.726026  | 0.000476  | H         | -0.110275 | 0.142890  | 1.883428  |
| C         | -0.510834 | -0.698857 | 0.001399  | H         | -0.634183 | 1.542720  | 0.938015  |
| C         | 0.810344  | -1.205222 | -0.000611 | H         | -0.825780 | -0.109564 | 0.265969  |
| N         | 1.608053  | -0.003504 | -0.003239 | N         | 4.349722  | 1.925449  | -0.002163 |
| O         | 1.327860  | 2.322275  | -0.004021 | H         | 4.324202  | 2.557111  | 0.791476  |
| O         | 1.295979  | -2.320448 | -0.000868 | C         | 5.598732  | 1.794004  | -0.736565 |
| C         | 3.028490  | -0.024280 | -0.002670 | H         | 6.125105  | 2.741329  | -0.623861 |
| H         | 3.380997  | -0.552303 | 0.890557  | C         | 6.462666  | 0.643081  | -0.230460 |
| H         | 3.380674  | -0.601743 | -0.864034 | H         | 5.948803  | -0.312406 | -0.342888 |
| H         | 3.394210  | 0.997859  | -0.028043 | H         | 7.391389  | 0.601105  | -0.802296 |
| Cl        | -1.857944 | 1.725027  | 0.002515  | H         | 6.711208  | 0.780956  | 0.822664  |
| Cl        | -1.884915 | -1.676104 | 0.005371  | H         | 5.374484  | 1.671917  | -1.795873 |
|           |           |           |           | Cl        | 3.710714  | -0.415136 | -2.378085 |
| <b>1b</b> |           |           |           | <b>2b</b> |           |           |           |
| C         | -1.381911 | -1.154479 | 0.117363  | C         | 1.434745  | -0.137752 | -0.867999 |
| C         | -0.129822 | -0.513612 | -0.068133 | C         | 2.799422  | 0.254799  | -1.137448 |
| C         | -0.309262 | 0.894625  | -0.200135 | C         | 3.219666  | 1.236028  | -0.172494 |
| C         | -1.685825 | 1.224310  | -0.105358 | C         | 2.115528  | 1.460686  | 0.713629  |
| N         | -2.310315 | -0.054985 | 0.088270  | N         | 1.088536  | 0.618232  | 0.250390  |
| O         | -1.723710 | -2.312326 | 0.271560  | O         | 0.706096  | -0.939946 | -1.449098 |
| O         | -2.313386 | 2.266220  | -0.156927 | O         | 2.051624  | 2.225180  | 1.684524  |
| C         | -3.717363 | -0.210252 | 0.236802  | C         | -0.202391 | 0.546692  | 0.881625  |
| H         | -4.057805 | 0.378524  | 1.094932  | H         | -0.089095 | 0.245344  | 1.924607  |
| H         | -4.221529 | 0.197637  | -0.645413 | H         | -0.681030 | 1.527589  | 0.860189  |
| H         | -3.939394 | -1.265250 | 0.367550  | H         | -0.799185 | -0.180035 | 0.337016  |
| Br        | 1.459612  | -1.431646 | -0.120765 | Br        | 3.732114  | -0.477965 | -2.538007 |
| Br        | 1.001647  | 2.154653  | -0.456656 | N         | 4.349385  | 1.909112  | -0.002236 |
|           |           |           |           | H         | 4.319856  | 2.525499  | 0.803533  |
| <b>1c</b> |           |           |           | C         | 5.602945  | 1.793175  | -0.729239 |
| C         | -1.293653 | -1.377218 | 0.137900  | H         | 6.116673  | 2.747685  | -0.616000 |
| C         | -0.288438 | -0.382091 | -0.050023 | C         | 6.479139  | 0.655063  | -0.215008 |
| C         | -0.902534 | 0.897793  | -0.203192 | H         | 5.978718  | -0.307293 | -0.329410 |
| C         | -2.320216 | 0.759872  | -0.117312 | H         | 7.412722  | 0.624727  | -0.779745 |
| N         | -2.510883 | -0.635595 | 0.089440  | H         | 6.717826  | 0.798149  | 0.839789  |
| O         | -1.243471 | -2.583706 | 0.306757  | H         | 5.385837  | 1.664352  | -1.789177 |
| O         | -3.239395 | 1.558216  | -0.188181 |           |           |           |           |
| C         | -3.803436 | -1.228167 | 0.232977  | <b>2c</b> |           |           |           |
| H         | -4.324287 | -0.768560 | 1.077694  | C         | 1.429934  | -0.140736 | -0.872836 |
| H         | -4.398447 | -1.029314 | -0.663050 | C         | 2.797253  | 0.243041  | -1.156680 |
| H         | -3.675614 | -2.295892 | 0.386557  | C         | 3.221135  | 1.222753  | -0.188423 |
| I         | 1.693608  | -0.852586 | -0.075769 | C         | 2.120691  | 1.452552  | 0.701399  |
| I         | -0.014524 | 2.706507  | -0.501419 | N         | 1.088309  | 0.615560  | 0.244452  |
|           |           |           |           | O         | 0.695093  | -0.942165 | -1.447963 |
| <b>2a</b> |           |           |           | O         | 2.063938  | 2.220772  | 1.669966  |
| C         | 1.456802  | -0.155909 | -0.850718 | C         | -0.200053 | 0.549139  | 0.882100  |
| C         | 2.817098  | 0.249854  | -1.112853 | H         | -0.089462 | 0.202198  | 1.911435  |
| C         | 3.220943  | 1.249801  | -0.162193 | H         | -0.654483 | 1.541162  | 0.903274  |
| C         | 2.107973  | 1.478697  | 0.710702  | H         | -0.816659 | -0.142328 | 0.314113  |
| N         | 1.093319  | 0.617000  | 0.250893  | N         | 4.348676  | 1.901064  | -0.010905 |
| O         | 0.744868  | -0.976911 | -1.426405 |           |           |           |           |

|           |           |           |           |           |           |           |           |
|-----------|-----------|-----------|-----------|-----------|-----------|-----------|-----------|
| H         | 4.308515  | 2.515740  | 0.795876  | H         | -5.500976 | -0.140724 | 0.781107  |
| C         | 5.608608  | 1.795052  | -0.724983 | <b>3a</b> |           |           |           |
| H         | 6.111882  | 2.755510  | -0.614231 | C         | 1.311612  | 0.992948  | 0.117095  |
| C         | 6.494469  | 0.670060  | -0.197940 | C         | -0.074331 | 0.755941  | -0.124005 |
| H         | 6.001045  | -0.297467 | -0.297972 | C         | -0.314533 | -0.656470 | -0.300193 |
| H         | 7.427194  | 0.638599  | -0.764226 | C         | 0.934439  | -1.340117 | -0.183817 |
| H         | 6.733903  | 0.828803  | 0.854385  | N         | 1.872826  | -0.299231 | 0.070923  |
| H         | 5.403484  | 1.658305  | -1.786519 | O         | 1.945408  | 2.024325  | 0.315546  |
| I         | 3.774641  | -0.598123 | -2.731723 | O         | 1.229169  | -2.527972 | -0.257281 |
| <b>2d</b> |           |           |           | C         | 3.262537  | -0.553823 | 0.294511  |
| C         | 2.491447  | 1.082513  | 0.158517  | H         | 3.432825  | -0.784179 | 1.352440  |
| C         | 1.141999  | 0.746916  | -0.265850 | H         | 3.559388  | -1.419472 | -0.295341 |
| C         | 1.003257  | -0.681918 | -0.343445 | H         | 3.824366  | 0.341506  | 0.037542  |
| C         | 2.265507  | -1.260293 | 0.036984  | C         | -2.733997 | -0.804047 | -0.447948 |
| N         | 3.086902  | -0.159363 | 0.317056  | H         | -3.342981 | -1.559138 | -0.937881 |
| O         | 3.006288  | 2.181016  | 0.341727  | C         | -3.135072 | -0.629280 | 0.999602  |
| O         | 2.559695  | -2.460254 | 0.102384  | H         | -2.520375 | 0.116265  | 1.504623  |
| N         | -0.009289 | -1.459301 | -0.692000 | H         | -4.173433 | -0.296226 | 1.043841  |
| H         | 0.211248  | -2.448583 | -0.628016 | H         | -3.051750 | -1.576008 | 1.533700  |
| C         | -1.363548 | -1.070993 | -1.044192 | H         | -2.797630 | 0.121204  | -1.017464 |
| H         | -1.785512 | -1.890161 | -1.626630 | Cl        | -1.165143 | 2.040688  | -0.229139 |
| H         | -1.325374 | -0.194388 | -1.692579 | O         | -1.393832 | -1.343959 | -0.557675 |
| C         | -2.238008 | -0.789265 | 0.178852  | <b>3b</b> |           |           |           |
| C         | -3.635181 | -0.330062 | -0.222010 | C         | -1.257240 | -1.032585 | 0.167211  |
| H         | -1.760545 | -0.022042 | 0.794767  | C         | 0.005955  | -0.417086 | -0.090992 |
| H         | -2.297982 | -1.694737 | 0.789493  | C         | -0.174603 | 0.996903  | -0.320891 |
| C         | -4.521558 | -0.044892 | 0.984636  | C         | -1.570737 | 1.291616  | -0.226261 |
| H         | -3.553940 | 0.570535  | -0.839474 | N         | -2.168793 | 0.036466  | 0.073869  |
| H         | -4.102796 | -1.094552 | -0.850914 | O         | -1.568461 | -2.194980 | 0.406431  |
| H         | -4.643136 | -0.937895 | 1.602567  | O         | -2.194114 | 2.341128  | -0.342885 |
| H         | -4.088284 | 0.737680  | 1.612365  | C         | -3.574869 | -0.115169 | 0.293523  |
| Cl        | -0.005209 | 1.933341  | -0.590351 | H         | -3.810553 | 0.072142  | 1.347204  |
| H         | 4.048459  | -0.259594 | 0.615724  | H         | -4.104480 | 0.618032  | -0.312263 |
| H         | -5.514983 | 0.285961  | 0.676439  | H         | -3.854702 | -1.138195 | 0.051199  |
| <b>2e</b> |           |           |           | Br        | 1.525242  | -1.449286 | -0.178556 |
| C         | 2.518821  | 0.759623  | 0.342597  | C         | 2.089003  | 1.871716  | -0.443035 |
| C         | 1.167388  | 0.487702  | -0.123110 | H         | 2.453183  | 2.756502  | -0.958523 |
| C         | 1.021427  | -0.922940 | -0.365139 | C         | 2.472196  | 1.890650  | 1.019795  |
| C         | 2.280117  | -1.548916 | -0.052475 | H         | 2.098317  | 1.013429  | 1.548601  |
| N         | 3.107764  | -0.495166 | 0.356280  | H         | 3.560344  | 1.896854  | 1.103445  |
| O         | 3.041980  | 1.823857  | 0.657219  | H         | 2.082175  | 2.786786  | 1.502894  |
| O         | 2.566099  | -2.750355 | -0.128988 | H         | 2.455215  | 0.987513  | -0.961389 |
| Br        | -0.049789 | 1.840627  | -0.322898 | O         | 0.653671  | 1.964789  | -0.608377 |
| N         | 0.012525  | -1.659319 | -0.805261 | <b>3c</b> |           |           |           |
| H         | 0.241204  | -2.647636 | -0.855223 | C         | 1.015268  | 0.991457  | 0.223531  |
| C         | -1.345886 | -1.246810 | -1.105582 | C         | -0.296936 | 0.769896  | -0.282724 |
| H         | -1.760366 | -1.992413 | -1.784426 | C         | -0.521016 | -0.635254 | -0.488164 |
| H         | -1.318922 | -0.295941 | -1.640128 | C         | 0.661308  | -1.343365 | -0.122303 |
| C         | -2.220201 | -1.127419 | 0.144034  | N         | 1.554911  | -0.315717 | 0.299368  |
| C         | -3.619631 | -0.625681 | -0.192248 | O         | 1.625223  | 2.010887  | 0.522694  |
| H         | -1.744131 | -0.443767 | 0.852473  | O         | 0.925475  | -2.539263 | -0.085024 |
| H         | -2.276176 | -2.103690 | 0.634169  | C         | 2.854511  | -0.591713 | 0.825877  |
| C         | -4.505137 | -0.503379 | 1.042210  | H         | 2.787120  | -0.778580 | 1.904173  |
| H         | -3.542473 | 0.347704  | -0.687758 | H         | 3.244543  | -1.487974 | 0.346483  |
| H         | -4.085365 | -1.303689 | -0.914769 | H         | 3.484832  | 0.280651  | 0.665270  |
| H         | -4.620797 | -1.469480 | 1.539637  | C         | -2.913548 | -0.817146 | -0.672178 |
| H         | -4.074456 | 0.193470  | 1.765553  | H         | -3.530499 | -1.627379 | -1.055876 |
| H         | 4.067148  | -0.635571 | 0.645028  |           |           |           |           |

|    |           |           |           |
|----|-----------|-----------|-----------|
| H  | -3.111659 | 0.079303  | -1.257911 |
| Cl | -1.319201 | 2.051151  | -0.682105 |
| O  | -1.567274 | -1.288314 | -0.933091 |
| C  | -3.143376 | -0.586935 | 0.795859  |
| C  | -3.924398 | 0.480807  | 1.219749  |
| C  | -2.590172 | -1.450810 | 1.738042  |
| C  | -4.160200 | 0.681250  | 2.572995  |
| H  | -4.345016 | 1.164097  | 0.490951  |
| C  | -2.815888 | -1.241895 | 3.089618  |
| H  | -1.974527 | -2.281117 | 1.412233  |
| C  | -3.603480 | -0.177456 | 3.509471  |
| H  | -4.768299 | 1.517494  | 2.895141  |
| H  | -2.378028 | -1.914145 | 3.817127  |
| H  | -3.778588 | -0.015705 | 4.565959  |

### 3d

|    |           |           |           |
|----|-----------|-----------|-----------|
| C  | -0.922253 | -0.960612 | 0.230426  |
| C  | 0.255168  | -0.349709 | -0.293151 |
| C  | 0.030185  | 1.055267  | -0.499287 |
| C  | -1.309824 | 1.364222  | -0.116735 |
| N  | -1.837374 | 0.115018  | 0.315655  |
| O  | -1.188540 | -2.117506 | 0.533160  |
| O  | -1.924989 | 2.423128  | -0.070471 |
| C  | -3.153029 | -0.021334 | 0.858952  |
| H  | -3.131485 | 0.161131  | 1.939634  |
| H  | -3.801445 | 0.720951  | 0.397016  |
| H  | -3.493713 | -1.040652 | 0.688129  |
| Br | 1.713018  | -1.361438 | -0.768344 |
| C  | 2.234473  | 2.009294  | -0.668869 |
| H  | 2.556853  | 2.969791  | -1.066377 |
| H  | 2.726298  | 1.216278  | -1.229858 |
| O  | 0.813079  | 2.005085  | -0.952909 |
| C  | 2.502867  | 1.896395  | 0.806240  |
| C  | 3.591198  | 1.162981  | 1.261749  |
| C  | 1.674375  | 2.539044  | 1.723141  |
| C  | 3.857482  | 1.077822  | 2.621553  |
| H  | 4.230620  | 0.649738  | 0.552733  |
| C  | 1.934339  | 2.442561  | 3.081287  |
| H  | 0.819896  | 3.106130  | 1.372550  |
| C  | 3.027615  | 1.714289  | 3.532938  |
| H  | 4.706795  | 0.502372  | 2.968588  |
| H  | 1.282863  | 2.940219  | 3.788992  |
| H  | 3.228937  | 1.639895  | 4.594514  |

### 3e

|    |           |           |           |
|----|-----------|-----------|-----------|
| C  | -2.151285 | -0.777447 | 0.723442  |
| C  | -0.858597 | -0.516399 | 0.185973  |
| C  | -0.808284 | 0.823748  | -0.335006 |
| C  | -2.074845 | 1.443944  | -0.142929 |
| N  | -2.846305 | 0.432648  | 0.501044  |
| O  | -2.634594 | -1.759434 | 1.259596  |
| O  | -2.496458 | 2.552867  | -0.419089 |
| Cl | 0.357896  | -1.681773 | 0.214300  |
| O  | 0.159790  | 1.500437  | -0.910787 |
| C  | -4.201732 | 0.635949  | 0.905583  |
| H  | -4.720859 | -0.320308 | 0.882252  |
| H  | -4.227227 | 1.017956  | 1.933151  |
| H  | -4.654072 | 1.378010  | 0.250659  |
| C  | 1.429810  | 0.943428  | -1.121830 |

|   |          |           |           |
|---|----------|-----------|-----------|
| C | 1.677377 | 0.296130  | -2.316166 |
| C | 2.398124 | 1.119666  | -0.153417 |
| C | 2.946428 | -0.220173 | -2.533404 |
| H | 0.889191 | 0.197703  | -3.051208 |
| C | 3.662307 | 0.597473  | -0.385063 |
| H | 2.159317 | 1.648984  | 0.759798  |
| C | 3.935008 | -0.075467 | -1.568822 |
| H | 3.161374 | -0.736428 | -3.460332 |
| H | 4.435320 | 0.718574  | 0.363067  |
| H | 4.923305 | -0.481192 | -1.743728 |

### 3f

|    |           |           |           |
|----|-----------|-----------|-----------|
| C  | -2.270792 | 0.997230  | -0.448480 |
| C  | -0.909769 | 0.683685  | -0.748471 |
| C  | -0.649007 | -0.681349 | -0.404154 |
| C  | -1.842678 | -1.281418 | 0.096239  |
| N  | -2.784941 | -0.216148 | 0.067828  |
| O  | -2.930674 | 2.018047  | -0.589330 |
| O  | -2.088923 | -2.406946 | 0.507646  |
| O  | 0.461250  | -1.382988 | -0.575062 |
| C  | -4.120888 | -0.350471 | 0.563964  |
| H  | -4.754961 | 0.364829  | 0.043593  |
| H  | -4.447132 | -1.378692 | 0.416950  |
| H  | -4.150848 | -0.126019 | 1.636105  |
| C  | 1.685401  | -0.816249 | -0.265491 |
| C  | 2.761878  | -1.186321 | -1.056871 |
| C  | 1.825319  | 0.040168  | 0.817788  |
| C  | 4.006244  | -0.652106 | -0.773333 |
| H  | 2.603895  | -1.866836 | -1.882801 |
| C  | 3.078067  | 0.566278  | 1.086332  |
| H  | 0.972739  | 0.274938  | 1.441983  |
| C  | 4.166137  | 0.229261  | 0.291443  |
| H  | 4.855794  | -0.921054 | -1.387880 |
| H  | 3.205239  | 1.235356  | 1.927668  |
| H  | 5.142447  | 0.643405  | 0.508095  |
| Br | 0.168948  | 1.830840  | -1.698796 |

### 4a

|   |           |           |           |
|---|-----------|-----------|-----------|
| C | -1.165162 | -1.035499 | -0.241640 |
| C | 0.101284  | -0.334239 | -0.352253 |
| C | -0.160440 | 1.071515  | -0.211270 |
| C | -1.575294 | 1.249673  | -0.050575 |
| N | -2.117834 | -0.034197 | -0.092109 |
| O | -1.412049 | -2.250102 | -0.232154 |
| O | -2.197260 | 2.300212  | 0.078151  |
| C | -3.522742 | -0.297928 | 0.089430  |
| H | -3.841375 | 0.007616  | 1.087990  |
| H | -4.100969 | 0.266271  | -0.643261 |
| H | -3.678991 | -1.365937 | -0.038335 |
| N | 0.624223  | 2.142693  | -0.298221 |
| H | 0.111287  | 3.014073  | -0.226411 |
| C | 2.073089  | 2.187412  | -0.254957 |
| H | 2.367291  | 3.179024  | -0.596901 |
| C | 2.641561  | 1.914940  | 1.134943  |
| H | 2.353824  | 0.925730  | 1.494324  |
| H | 3.731764  | 1.960286  | 1.105294  |
| H | 2.282088  | 2.656897  | 1.849339  |
| H | 2.468443  | 1.464353  | -0.973629 |
| S | 1.630302  | -1.059495 | -0.571787 |
| C | 1.280422  | -2.553000 | -1.562718 |

|   |          |           |           |
|---|----------|-----------|-----------|
| C | 2.519735 | -3.431777 | -1.606961 |
| H | 0.996319 | -2.206212 | -2.557362 |
| H | 0.425015 | -3.049829 | -1.110074 |
| C | 2.290243 | -4.674060 | -2.464027 |
| H | 3.369201 | -2.867750 | -2.006468 |
| H | 2.790236 | -3.734816 | -0.591008 |
| C | 3.516853 | -5.576678 | -2.520685 |
| H | 1.438150 | -5.232428 | -2.064510 |
| H | 2.010841 | -4.366932 | -3.476886 |
| H | 3.331569 | -6.457855 | -3.137634 |
| H | 4.375334 | -5.047864 | -2.942822 |
| H | 3.796939 | -5.921273 | -1.522050 |

**4b**

|   |           |           |           |
|---|-----------|-----------|-----------|
| C | 7.838719  | -1.534816 | -0.311205 |
| C | 7.851654  | -0.105884 | -0.055362 |
| C | 9.191676  | 0.262770  | 0.312115  |
| C | 9.998752  | -0.926130 | 0.321650  |
| N | 9.134350  | -1.959571 | -0.047761 |
| O | 6.929145  | -2.273370 | -0.711206 |
| O | 11.199919 | -1.034364 | 0.610804  |
| C | 9.565638  | -3.323033 | -0.221137 |
| H | 9.982075  | -3.473534 | -1.220564 |
| H | 10.337175 | -3.541708 | 0.514958  |
| H | 8.703453  | -3.974211 | -0.095954 |
| N | 9.735295  | 1.417865  | 0.692333  |
| H | 10.710518 | 1.328629  | 0.953871  |
| C | 9.155206  | 2.744427  | 0.620188  |
| H | 9.737525  | 3.379985  | 1.286489  |
| C | 9.149613  | 3.321805  | -0.792599 |
| H | 8.575067  | 2.693313  | -1.474814 |
| H | 8.697578  | 4.315409  | -0.785715 |
| H | 10.166807 | 3.405527  | -1.177856 |
| H | 8.136995  | 2.703728  | 1.015940  |
| S | 6.523975  | 0.954026  | -0.218340 |
| C | 5.071082  | -0.079713 | 0.175625  |
| C | 3.803026  | 0.665177  | -0.208190 |
| H | 5.111624  | -0.278765 | 1.247597  |
| H | 5.188167  | -1.021117 | -0.356609 |
| C | 2.556795  | -0.137654 | 0.153608  |
| H | 3.768502  | 1.636490  | 0.296268  |
| H | 3.808371  | 0.866169  | -1.283548 |
| C | 1.263673  | 0.582981  | -0.210544 |
| H | 2.591082  | -1.106815 | -0.355360 |
| H | 2.562345  | -0.352725 | 1.227938  |
| H | 1.232636  | 1.551189  | 0.302440  |
| H | 1.262594  | 0.804581  | -1.283928 |
| C | 0.012432  | -0.213798 | 0.140960  |
| C | -1.282131 | 0.512783  | -0.206154 |
| H | 0.020385  | -0.446157 | 1.212311  |
| H | 0.038608  | -1.177462 | -0.380672 |
| C | -2.535246 | -0.283448 | 0.140303  |
| H | -1.308241 | 1.474743  | 0.319166  |
| H | -1.288455 | 0.749638  | -1.276583 |
| C | -3.829529 | 0.449853  | -0.193586 |
| H | -2.514030 | -1.241501 | -0.392152 |
| H | -2.524182 | -0.528380 | 1.208937  |
| H | -3.850816 | 1.406500  | 0.341619  |
| H | -3.839676 | 0.697977  | -1.261496 |
| C | -5.083698 | -0.346144 | 0.149678  |

|   |            |           |           |
|---|------------|-----------|-----------|
| C | -6.377355  | 0.392697  | -0.174307 |
| H | -5.070140  | -0.600215 | 1.216173  |
| H | -5.066331  | -1.299785 | -0.390884 |
| C | -7.632396  | -0.402840 | 0.166856  |
| H | -6.394658  | 1.345322  | 0.368170  |
| H | -6.390314  | 0.648998  | -1.240271 |
| C | -8.925330  | 0.340412  | -0.149845 |
| H | -7.618122  | -1.353209 | -0.379569 |
| H | -7.616990  | -0.663488 | 1.231743  |
| H | -8.939400  | 1.290092  | 0.397856  |
| H | -8.940317  | 0.602574  | -1.214361 |
| C | -10.181175 | -0.454441 | 0.189955  |
| C | -11.473372 | 0.292318  | -0.121486 |
| H | -10.164458 | -0.719743 | 1.253671  |
| H | -10.169414 | -1.402456 | -0.360622 |
| C | -12.729981 | -0.501764 | 0.217484  |
| H | -11.484842 | 1.239888  | 0.429894  |
| H | -11.489796 | 0.558599  | -1.184950 |
| C | -14.021510 | 0.247519  | -0.090194 |
| H | -12.720143 | -1.448143 | -0.335969 |
| H | -12.712292 | -0.770246 | 1.280395  |
| H | -14.031873 | 1.193850  | 0.463632  |
| H | -14.039787 | 0.516819  | -1.153027 |
| C | -15.279724 | -0.545254 | 0.248067  |
| H | -15.269599 | -1.489559 | -0.306943 |
| H | -15.259699 | -0.815339 | 1.309471  |
| C | -16.564375 | 0.215181  | -0.061028 |
| H | -17.449658 | -0.372983 | 0.190003  |
| H | -16.613012 | 1.149010  | 0.505478  |
| H | -16.623578 | 0.469888  | -1.122637 |

**4c**

|   |           |           |           |
|---|-----------|-----------|-----------|
| C | -1.849411 | -1.031692 | 1.006387  |
| C | -0.590306 | -0.938442 | 0.291124  |
| C | -0.576240 | 0.309728  | -0.432432 |
| C | -1.850351 | 0.944082  | -0.222306 |
| N | -2.561278 | 0.103130  | 0.636755  |
| O | -2.259454 | -1.918149 | 1.757269  |
| O | -2.231414 | 2.039349  | -0.659180 |
| C | -3.902501 | 0.381626  | 1.082525  |
| H | -3.944991 | 1.378322  | 1.523775  |
| H | -4.599309 | 0.346636  | 0.242645  |
| H | -4.169584 | -0.372903 | 1.818107  |
| N | 0.344592  | 0.996479  | -1.111451 |
| H | -0.008347 | 1.906892  | -1.388358 |
| C | 1.763263  | 0.748684  | -1.291789 |
| H | 2.108269  | 1.487135  | -2.014652 |
| C | 2.569014  | 0.865178  | -0.001079 |
| H | 2.247137  | 0.131389  | 0.738328  |
| H | 3.625323  | 0.689469  | -0.213134 |
| H | 2.461794  | 1.860772  | 0.431590  |
| H | 1.911140  | -0.231147 | -1.744845 |
| S | 0.541263  | -2.197365 | 0.486041  |
| C | 1.199721  | -2.452339 | -1.138647 |
| C | 2.537742  | -2.824471 | -1.252621 |
| C | 0.397199  | -2.331480 | -2.271851 |
| C | 3.074449  | -3.060587 | -2.507759 |
| H | 3.152922  | -2.914377 | -0.365825 |
| C | 0.949793  | -2.558146 | -3.521408 |
| H | -0.647045 | -2.066582 | -2.170527 |

|   |          |           |           |
|---|----------|-----------|-----------|
| C | 2.285707 | -2.920248 | -3.642956 |
| H | 4.114481 | -3.346984 | -2.599812 |
| H | 0.330215 | -2.461310 | -4.404013 |
| H | 2.710670 | -3.099112 | -4.622511 |

#### 4d

|   |           |           |           |
|---|-----------|-----------|-----------|
| C | -2.238772 | -1.287599 | 0.952989  |
| C | -1.142186 | -0.372169 | 0.702483  |
| C | -1.458699 | 0.397008  | -0.475582 |
| C | -2.708843 | -0.095014 | -0.989693 |
| N | -3.121902 | -1.092106 | -0.103033 |
| O | -2.384546 | -2.105534 | 1.862906  |
| O | -3.333103 | 0.309927  | -1.980544 |
| C | -4.335845 | -1.847781 | -0.277515 |
| H | -5.190727 | -1.171430 | -0.327280 |
| H | -4.296398 | -2.420867 | -1.205640 |
| H | -4.433178 | -2.518150 | 0.572710  |
| N | -0.921570 | 1.461956  | -1.074217 |
| H | -1.502478 | 1.786671  | -1.840317 |
| C | 0.162453  | 2.326154  | -0.645638 |
| H | 0.379223  | 2.982055  | -1.488109 |
| C | -0.180293 | 3.156354  | 0.589132  |
| H | -0.411547 | 2.520813  | 1.444540  |
| H | 0.670155  | 3.787237  | 0.855041  |
| H | -1.040895 | 3.798073  | 0.395473  |
| H | 1.057479  | 1.730543  | -0.469351 |
| S | 0.167774  | -0.356951 | 1.792192  |
| C | 1.599174  | -0.247871 | 0.749123  |
| C | 2.723563  | 0.445346  | 1.222317  |
| C | 1.606211  | -0.877984 | -0.494958 |
| C | 3.837422  | 0.501013  | 0.392144  |
| C | 2.726358  | -0.795167 | -1.302142 |
| H | 0.736088  | -1.433209 | -0.819574 |
| C | 3.843293  | -0.100953 | -0.858527 |
| H | 4.716085  | 1.034736  | 0.734502  |
| H | 2.729384  | -1.281369 | -2.269287 |
| H | 4.725107  | -0.033358 | -1.483265 |
| C | 2.733780  | 1.117665  | 2.566238  |
| H | 1.957239  | 1.882393  | 2.635178  |
| H | 2.556275  | 0.402560  | 3.373105  |
| H | 3.696681  | 1.593041  | 2.747675  |

#### 4e

|   |           |           |           |
|---|-----------|-----------|-----------|
| C | -1.204544 | -1.032662 | -0.459904 |
| C | 0.087662  | -0.380559 | -0.347695 |
| C | -0.144886 | 1.010355  | -0.066281 |
| C | -1.564068 | 1.231846  | -0.039924 |
| N | -2.136721 | -0.018887 | -0.290590 |
| O | -1.488575 | -2.225419 | -0.632457 |
| O | -2.170461 | 2.296819  | 0.147067  |
| C | -3.559135 | -0.247413 | -0.286049 |
| H | -3.922115 | -0.408151 | 0.732395  |
| H | -4.055012 | 0.629568  | -0.698455 |
| H | -3.766825 | -1.134678 | -0.879815 |
| N | 0.678526  | 2.047034  | 0.078024  |
| H | 0.190085  | 2.926218  | 0.203636  |
| C | 2.120094  | 2.025577  | 0.231539  |
| H | 2.474580  | 3.034036  | 0.020922  |
| C | 2.569880  | 1.584574  | 1.621698  |
| H | 2.217216  | 0.577910  | 1.851700  |

|   |          |           |           |
|---|----------|-----------|-----------|
| H | 3.660126 | 1.581320  | 1.675296  |
| H | 2.186214 | 2.264492  | 2.383686  |
| H | 2.543982 | 1.365279  | -0.529867 |
| S | 1.604636 | -1.151652 | -0.472852 |
| C | 1.308269 | -2.509408 | -1.677153 |
| H | 1.203503 | -2.037584 | -2.653293 |
| H | 0.362598 | -2.970112 | -1.399666 |
| C | 2.468662 | -3.455377 | -1.630497 |
| C | 2.488982 | -4.491044 | -0.699301 |
| C | 3.543872 | -3.305058 | -2.501069 |
| C | 3.564497 | -5.364103 | -0.643375 |
| H | 1.653168 | -4.612331 | -0.019592 |
| C | 4.620640 | -4.178921 | -2.447043 |
| H | 3.533810 | -2.502088 | -3.229765 |
| C | 4.632730 | -5.209477 | -1.517646 |
| H | 3.567926 | -6.169173 | 0.081247  |
| H | 5.449677 | -4.055935 | -3.133207 |
| H | 5.471849 | -5.893138 | -1.475820 |

#### 4f

|   |           |           |           |
|---|-----------|-----------|-----------|
| C | -1.865102 | -1.052349 | 1.013287  |
| C | -0.590562 | -0.907588 | 0.335328  |
| C | -0.569292 | 0.382426  | -0.310453 |
| C | -1.852735 | 0.994829  | -0.093535 |
| N | -2.576981 | 0.098212  | 0.695266  |
| O | -2.286045 | -1.985503 | 1.698725  |
| O | -2.234082 | 2.111301  | -0.472336 |
| C | -3.930872 | 0.341178  | 1.122524  |
| H | -3.986439 | 1.292597  | 1.653602  |
| H | -4.599214 | 0.388774  | 0.260686  |
| H | -4.222987 | -0.476531 | 1.776486  |
| N | 0.363057  | 1.107551  | -0.930400 |
| H | 0.014994  | 2.033515  | -1.164775 |
| C | 1.801421  | 0.899990  | -1.048463 |
| C | 2.494873  | 1.041848  | 0.306439  |
| H | 2.083800  | 0.346456  | 1.038826  |
| H | 3.560899  | 0.831124  | 0.200540  |
| H | 2.376598  | 2.057670  | 0.689247  |
| H | 1.968059  | -0.107435 | -1.426011 |
| S | 0.542156  | -2.173902 | 0.471009  |
| C | 1.237760  | -2.316516 | -1.152227 |
| C | 2.577070  | -2.686555 | -1.260034 |
| C | 0.467867  | -2.097525 | -2.293235 |
| C | 3.148579  | -2.818316 | -2.514991 |
| H | 3.166890  | -2.852605 | -0.367003 |
| C | 1.055394  | -2.219042 | -3.541364 |
| H | -0.577732 | -1.835504 | -2.199460 |
| C | 2.393533  | -2.575551 | -3.655810 |
| H | 4.189787  | -3.102013 | -2.601758 |
| H | 0.461564  | -2.043802 | -4.429567 |
| H | 2.846112  | -2.670981 | -4.634659 |
| C | 2.337148  | 1.887386  | -2.073232 |
| H | 2.173327  | 2.916995  | -1.743153 |
| H | 3.409569  | 1.743180  | -2.205589 |
| H | 1.848607  | 1.748149  | -3.038675 |

#### 4g

|   |           |           |           |
|---|-----------|-----------|-----------|
| C | -1.528247 | -1.071031 | 0.714916  |
| C | -0.257221 | -0.785779 | 0.081456  |
| C | -0.351605 | 0.506745  | -0.529433 |



|   |           |           |           |
|---|-----------|-----------|-----------|
| C | -1.702050 | 0.978771  | -0.376712 |
| N | -2.350368 | 0.009033  | 0.387864  |
| O | -1.872583 | -2.054805 | 1.369517  |
| O | -2.196344 | 2.026264  | -0.807266 |
| C | -3.730672 | 0.109121  | 0.788463  |
| H | -3.858365 | 0.914575  | 1.515127  |
| H | -4.353211 | 0.325291  | -0.079928 |
| H | -4.014653 | -0.838671 | 1.239125  |
| N | 0.527010  | 1.288256  | -1.179708 |
| H | 0.076285  | 2.049099  | -1.679523 |
| S | 0.932841  | -2.014415 | 0.055945  |
| C | 1.750874  | -1.779472 | -1.502000 |
| C | 3.137563  | -1.882397 | -1.544699 |
| C | 1.019040  | -1.573879 | -2.670000 |
| C | 3.793454  | -1.771849 | -2.760383 |
| H | 3.697298  | -2.030823 | -0.630628 |
| C | 1.686147  | -1.451693 | -3.876448 |
| H | -0.061061 | -1.518414 | -2.631092 |
| C | 3.071698  | -1.551657 | -3.924803 |
| H | 4.872972  | -1.845545 | -2.793836 |
| H | 1.120232  | -1.290889 | -4.785571 |
| H | 3.587666  | -1.459023 | -4.872289 |
| C | 1.919028  | 1.338163  | -1.068667 |
| C | 2.662904  | 1.785935  | -2.160994 |
| C | 2.563271  | 0.997744  | 0.121802  |
| C | 4.040004  | 1.870852  | -2.066025 |
| H | 2.154443  | 2.044442  | -3.081641 |
| C | 3.941116  | 1.083298  | 0.201782  |
| H | 1.981769  | 0.691388  | 0.980834  |
| C | 4.686947  | 1.514294  | -0.889114 |
| H | 4.613051  | 2.210720  | -2.919630 |
| H | 4.435822  | 0.823199  | 1.129462  |
| H | 5.765308  | 1.579895  | -0.819224 |

#### 4h

|   |           |           |           |
|---|-----------|-----------|-----------|
| C | -2.335272 | -2.874867 | 1.642833  |
| C | -1.699813 | -1.563266 | 1.617938  |
| C | -2.358489 | -0.766031 | 0.612193  |
| C | -3.331760 | -1.600061 | -0.048562 |
| N | -3.264636 | -2.826378 | 0.615222  |
| O | -2.088635 | -3.849688 | 2.347472  |
| O | -4.117720 | -1.273560 | -0.946433 |
| N | -2.360661 | 0.537831  | 0.344577  |
| H | -3.060551 | 0.784276  | -0.349288 |
| S | -0.363706 | -1.254464 | 2.625131  |
| H | -3.823560 | -3.626480 | 0.353490  |
| C | -1.699520 | 1.624781  | 1.037328  |
| C | -0.698312 | 2.370878  | 0.159329  |
| H | -1.210768 | 1.228032  | 1.925311  |
| H | -2.473069 | 2.321509  | 1.377087  |
| C | -0.068784 | 3.548803  | 0.894631  |
| H | 0.076752  | 1.679257  | -0.173847 |
| H | -1.212441 | 2.728896  | -0.738633 |
| C | 0.953931  | 4.288259  | 0.040788  |
| H | -0.854493 | 4.241941  | 1.212781  |
| H | 0.411614  | 3.185925  | 1.808736  |
| H | 1.390666  | 5.129449  | 0.582577  |
| H | 1.766453  | 3.621402  | -0.256938 |
| H | 0.494632  | 4.680058  | -0.870286 |
| C | 0.823450  | -0.512254 | 1.530478  |

|   |          |           |           |
|---|----------|-----------|-----------|
| C | 1.684503 | 0.453796  | 2.044912  |
| C | 0.943226 | -0.939528 | 0.209393  |
| C | 2.660947 | 0.999931  | 1.228398  |
| H | 1.583619 | 0.779296  | 3.073044  |
| C | 1.919135 | -0.379703 | -0.598905 |
| H | 0.287158 | -1.709923 | -0.173471 |
| C | 2.776906 | 0.589235  | -0.094234 |
| H | 3.328929 | 1.754355  | 1.624374  |
| H | 2.014711 | -0.709507 | -1.625674 |
| H | 3.539320 | 1.021511  | -0.729828 |

#### 4i

|   |           |           |           |
|---|-----------|-----------|-----------|
| C | -1.171471 | -1.071102 | -0.316305 |
| C | 0.098032  | -0.359329 | -0.389790 |
| C | -0.171015 | 1.039932  | -0.201362 |
| C | -1.594363 | 1.213500  | -0.044153 |
| N | -2.116132 | -0.074544 | -0.137198 |
| O | -1.411788 | -2.282551 | -0.353243 |
| O | -2.214015 | 2.273861  | 0.118584  |
| N | 0.607785  | 2.118884  | -0.238845 |
| H | 0.088102  | 2.984753  | -0.146558 |
| C | 2.055390  | 2.173779  | -0.253910 |
| H | 2.330667  | 3.169545  | -0.599596 |
| C | 2.681291  | 1.893637  | 1.109835  |
| H | 2.407951  | 0.902626  | 1.475356  |
| H | 3.769321  | 1.938781  | 1.034343  |
| H | 2.352499  | 2.632131  | 1.842214  |
| H | 2.424462  | 1.456505  | -0.992776 |
| S | 1.634042  | -1.070132 | -0.591072 |
| C | 1.315002  | -2.558796 | -1.597767 |
| C | 2.553383  | -3.440035 | -1.607128 |
| H | 1.062167  | -2.207354 | -2.599352 |
| H | 0.444384  | -3.054590 | -1.173845 |
| C | 2.349573  | -4.673423 | -2.483559 |
| H | 3.417737  | -2.874980 | -1.971594 |
| H | 2.787127  | -3.753914 | -0.585427 |
| C | 3.573963  | -5.580644 | -2.504720 |
| H | 1.481344  | -5.231672 | -2.120391 |
| H | 2.108273  | -4.355668 | -3.502911 |
| H | 3.407208  | -6.455346 | -3.135982 |
| H | 4.448588  | -5.051399 | -2.891463 |
| H | 3.817032  | -5.935417 | -1.500000 |
| H | -3.095997 | -0.283468 | -0.005600 |

#### 4j

|   |           |           |           |
|---|-----------|-----------|-----------|
| C | -1.039879 | -2.151995 | 0.401470  |
| C | -0.841055 | -0.713518 | 0.501834  |
| C | -2.116821 | -0.079298 | 0.317823  |
| C | -3.104478 | -1.100959 | 0.074837  |
| N | -2.388451 | -2.296564 | 0.129372  |
| O | -0.232419 | -3.080675 | 0.531064  |
| O | -4.314742 | -0.953043 | -0.139542 |
| N | -2.472261 | 1.200607  | 0.282691  |
| H | -3.449710 | 1.346709  | 0.053925  |
| S | 0.626964  | 0.084575  | 0.823245  |
| H | -2.824615 | -3.204258 | 0.045217  |
| C | -1.646597 | 2.354205  | 0.570097  |
| C | -2.447331 | 3.635723  | 0.418261  |
| H | -0.784339 | 2.359638  | -0.108398 |
| H | -1.246326 | 2.276532  | 1.588151  |

|   |           |           |           |
|---|-----------|-----------|-----------|
| C | -1.606173 | 4.875733  | 0.698512  |
| H | -2.851265 | 3.686341  | -0.598123 |
| H | -3.302304 | 3.608382  | 1.101970  |
| C | -2.401910 | 6.166778  | 0.548831  |
| H | -1.195721 | 4.812053  | 1.711325  |
| H | -0.748784 | 4.890859  | 0.018098  |
| H | -1.781124 | 7.040891  | 0.753270  |
| H | -2.798428 | 6.268148  | -0.464537 |
| H | -3.247917 | 6.188716  | 1.240344  |
| C | 1.907850  | -1.010973 | 0.087675  |
| H | 2.836148  | -0.627079 | 0.508400  |
| H | 1.714024  | -2.015771 | 0.451498  |
| C | 1.894806  | -0.936581 | -1.410230 |
| C | 2.534366  | 0.109006  | -2.072615 |
| C | 1.224960  | -1.905506 | -2.152263 |
| C | 2.504001  | 0.187292  | -3.456189 |
| H | 3.060357  | 0.865151  | -1.499865 |
| C | 1.195252  | -1.825983 | -3.537773 |
| H | 0.736025  | -2.721217 | -1.633727 |
| C | 1.830722  | -0.779945 | -4.192042 |
| H | 3.007872  | 1.002115  | -3.961834 |
| H | 0.674827  | -2.586184 | -4.107688 |
| H | 1.805772  | -0.719444 | -5.273318 |

## 10. REFERENCES

1. M. P. Robin, A. B. Mabire, J. C. Damborsky, E. S. Thom, U. H. Winzer-Serhan, J. E. Raymond and R. K. O'Reilly, *J. Am. Chem. Soc.*, 2013, **135**, 9518-9524.
2. M. Dubernet, V. Caubert, J. Guillard and M.-C. Viaud-Massuard, *Tetrahedron*, 2005, **61**, 4585-4593.
3. R. Nirogi, A. Dwarampudi, R. Kambhampati, V. Bhatta, L. Kota, A. Shinde, R. Badange, P. Jayarajan, G. Bhyrapuneni and P. K. Dubey, *Bioorg. Med. Chem. Lett.*, 2011, **21**, 4577-4580.
4. A. B. Mabire, M. P. Robin, W.-D. Quan, H. Willcock, V. G. Stavros and R. K. O'Reilly, *Chem. Commun*, 2015, **51**, 9733-9736.
5. C. Würth, M. Grabolle, J. Pauli, M. Spieles and U. Resch-Genger, *Nat. Protoc.*, 2013, **8**, 1535-1550.
6. K. I. Booker-Milburn, J. R. Baker and I. Bruce, *Org. Lett.*, 2004, **6**, 1481-1484.
7. T. Yanai, D. P. Tew and N. C. Handy, *Chem. Phys. Lett.*, 2004, **393**, 51-57.
8. W. J. Hehre, R. Ditchfield and J. A. Pople, *J. Chem. Phys.*, 1972, **56**, 2257-2261.
9. W. J. Hehre, L. Radom, P. v. R. Schleyer and J. A. Pople, *Ab Initio Molecular Orbital Theory*, Wiley, New York, 1986.
10. S. Grimme, J. Antony, S. Ehrlich and H. A. Krieg, *J. Chem. Phys.*, 2010, **132**, 154104.
11. E. R. Johnson and A. D. Becke, *J. Chem. Phys.*, 2006, **124**, 174104.
12. S. Grimme, S. Ehrlich and L. Goerigk, *J. Comput. Chem.*, 2011, **32**, 1456-1465.
13. M. Cossi, N. Rega, G. Scalmani and V. Barone, *J. Comput. Chem.*, 2003, **24**, 669-681.
14. J. Tomasi, B. Mennucci and R. Cammi, *Chem. Rev.*, 2005, **105**, 2999-3093.
15. R. Bauernschmitt and R. Ahlrichs, *Chem. Phys. Lett.* 1996, **256**, 454-464.
16. M. E. Casida, C. Jamorski, K. C. Casida and D. R. Salahub, *J. Chem. Phys.* 1998, **108**, 4439-4449.
17. R. E. Stratmann, G. E. Scuseria and M. J. Frisch, *J. Chem. Phys.* 1998, **109**, 8218-8224.
18. C. Van Caillie and R. D. Amos, *Chem. Phys. Lett.* **1999**, *308*, 249-255.
19. C. Van Caillie and R. D. Amos, *Chem. Phys. Lett.* **2000**, *317*, 159-164
20. F. Furche and R. Ahlrichs, *J. Chem. Phys.* **2002**, *117*, 7433-7447.
21. G. Scalmani, M. J. Frisch, B. Mennucci, J. Tomasi, R. Cammi and V. Barone, *J. Chem. Phys.* **2006**, *124*, 094107.
22. C. Adamo and D. Jacquemin, *Chem. Soc. Rev.*, **2013**, *42*, 845-856.
23. A. D. Laurent, C. Adamo and D. Jacquemin, *Phys. Chem. Chem. Phys.*, **2014**, *16*, 14334-14356.
24. A. E. Reed, L. A. Curtiss and F. Weinhold, *Chem. Rev.*, **1988**, *88*, 899-926.
25. M. J. Frisch, G. W. Trucks, H. B. Schlegel, G. E. Scuseria, M. A. Robb, J. R. Cheeseman, G. Scalmani, V. Barone, B. Mennucci, G. A. Petersson, H. Nakatsuji, M. Caricato, X. Li, H. P. Hratchian, A. F. Izmaylov, J. Bloino, G. Zheng, J. L. Sonnenberg, M. Hada, M. Ehara, K. Toyota, R. Fukuda, J. Hasegawa, M. Ishida, T. Nakajima, Y. Honda, O. Kitao, H. Nakai, T. Vreven, J. A. Montgomery Jr., J. E. Peralta, F. Ogliaro, M. Bearpark, J. J. Heyd, E. Brothers,

K. N. Kudin, V. N. Staroverov, R. Kobayashi, J. Normand, K. Raghavachari, A. Rendell, J. C. Burant, S. S. Iyengar, J. Tomasi, M. Cossi, N. Rega, J. M. Millam, M. Klene, J. E. Knox, J. B. Cross, V. Bakken, C. Adamo, J. Jaramillo, R. Gomperts, R. E. Stratmann, O. Yazyev, A. J. Austin, R. Cammi, C. Pomelli, J. W. Ochterski, R. L. Martin, K. Morokuma, V. G. Zakrzewski, G. A. Voth, P. Salvador, J. J. Dannenberg, S. Dapprich, A. D. Daniels, Ö. Farkas, J. B. Foresman, J. V. Ortiz, J. Cioslowski and D. J. Fox, *Gaussian 09, revision E.01*, Gaussian, Inc.: Wallingford, CT, 2009.
